# Supplementary material for: Theophylline-based hybrids as acetylcholinesterase inhibitors endowed with anti-inflammatory activity: synthesis, bioevaluation,in silicoand preliminary kinetic studies
Source: Royal Society of Chemistry journal article supplement (doi:10.1039/d3ra04867e), 2023-01-01
Supplement: d3ra04867e1.pdf [file d3ra04867e1.pdf]

## Supporting information

### **Theophylline-based hybrids as acetylcholinesterase inhibitors endowed with anti-inflammatory activity: Synthesis, bioevaluation, in silico and preliminary kinetic studies**

Abdullah A. Elgazar<sup>a</sup>, Ramadan A. El-Domany<sup>b</sup>, Wagdy M. Eldehna<sup>c</sup>, Farid A. Badria<sup>d\*</sup>

<sup>a</sup>*Department of Pharmacognosy, Faculty of Pharmacy, Kafrelsheikh University, Kafrelsheikh, P.O. Box 33516, Egypt*

<sup>b</sup>*Department of Microbiology and Immunology, Faculty of Pharmacy, Kafrelsheikh University, Kafrelsheikh, P.O. Box 33516, Egypt*

<sup>c</sup>*Department of Pharmaceutical Chemistry, Faculty of Pharmacy, Kafrelsheikh University, Kafrelsheikh, P.O. Box 33516, Egypt*

<sup>d</sup>*Department of Pharmacognosy, Faculty of Pharmacy, Mansoura University, Mansoura, Egypt*

\*Corresponding author:

Farid A. Badria Tel.: (+20)1001762927, E-mail address: faridbadria@gmail.com

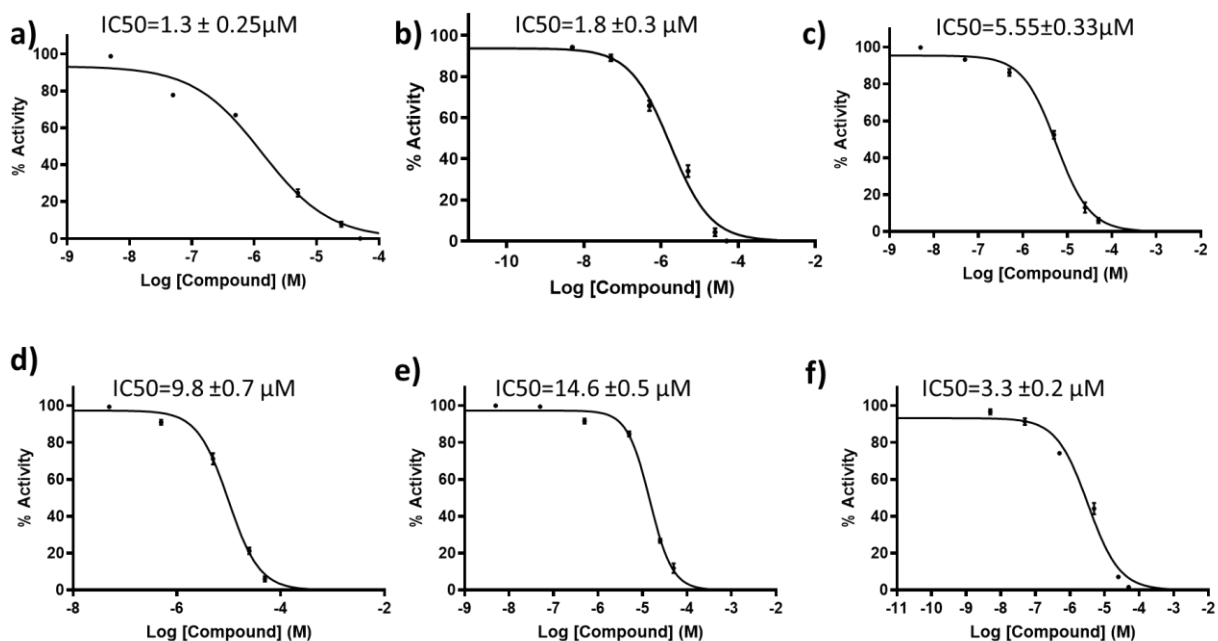

**Figure S1:**  $IC_{50}$  of the most active hybrid against Acetylcholinesterase (AChE). a) Galantamine b) 6d c) 9c d) 15c e) 18j f) 19

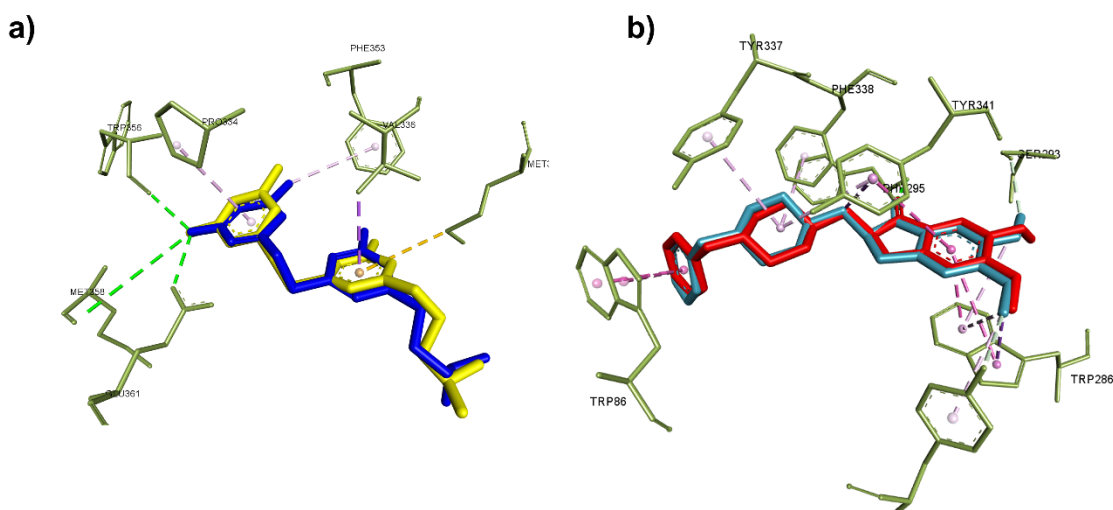

**Figure S2:** a) Redocking the co-crystallized ligand W69 in the active site of nitric oxide synthase, PDB: 6AV7 where the redocked pose represented as blue sticks and the experimental pose as yellow sticks. B) Redocking the co-crystallized ligand E20 in the active site of acetylcholinesterase, PDB: 4ey7 where the redocked pose represented as cyan sticks and the experimental pose as red sticks

**Table.s1 NMR assignment of ACEFYLLINE-menthol hybrid 4a**

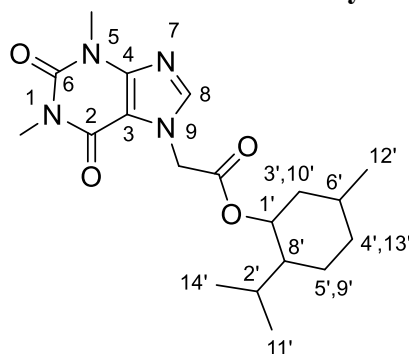

| Parent compound |                    |                               |                          | Hybrid compound |                                               |                          |
|-----------------|--------------------|-------------------------------|--------------------------|-----------------|-----------------------------------------------|--------------------------|
| C/H             | Atom               | <sup>1</sup> H(δ, (J,Hz) ppm) | <sup>13</sup> C (δ, ppm) | DEPT            | <sup>1</sup> H (δ, (J,Hz) ppm)                | <sup>13</sup> C (δ, ppm) |
|                 | COOH               |                               | 169.48                   | C               | ---                                           | 166.60                   |
|                 | 1                  | -                             | 154.3                    | C               | --                                            | 155.16                   |
|                 | 2                  | --                            | 151.13                   | C               | --                                            | 151.69                   |
|                 | 3                  | --                            | 148.36                   | C               | --                                            | 148.29                   |
|                 | 4                  | 8.04                          | 143.63                   | CH              | 7.59 (s, 1H)                                  | 141.79                   |
|                 | 5                  | --                            | 106.83                   | C               | --                                            | 107.20                   |
|                 | 1'                 | 3.4<br>td,(j=10.4,4.3)        | 71.5                     | CH              | 4.71 (td, <i>J</i> = 10.9, 4.4 Hz, 1H)        | 76.88                    |
|                 | 8'                 | 1.1                           | 50.12                    | CH              | 1.36 (dtt, <i>J</i> = 38.3, 11.3, 3.0 Hz, 1H) | 47.62                    |
|                 | CH <sub>2</sub> CO | 5.07                          | 47.6                     | CH <sub>2</sub> | 5.01 (s, 2H)                                  | 46.90                    |
|                 | 3'                 | 1.9                           | 45                       | CH              | 1.78 (qt, <i>J</i> = 7.2, 3.2 Hz, 1H)         | 40.62                    |
|                 | 10'                | 0.95                          | 45                       | CH              | 1.05 – 0.89 (m, 1H)                           | 40.62                    |
|                 | 13'                | 0.84                          | 34.52                    | CH              | 0.83 (t, <i>J</i> = 7.0 Hz, 1H)               | 34.02                    |
|                 | 4'                 | 1.66                          | 34.5                     | CH              | 1.61 (dt, <i>J</i> = 12.1, 2.8 Hz, 1H)        | 34.02                    |
|                 | 6'                 | 1.43                          | 31.6                     | CH              | 1.61 (dt, <i>J</i> = 12.1, 2.8 Hz, 1H)        | 31.40                    |
|                 | 6                  | 3.44                          | 29.92                    | CH <sub>3</sub> | 3.53 (s, 3H)                                  | 29.91                    |
|                 | 7                  | 3.20                          | 27.9                     | CH <sub>3</sub> | 3.31 (s, 3H)                                  | 27.93                    |
|                 | 2'                 | 2.17                          | 25.8                     | CH              | 1.96 (d, <i>J</i> = 11.5 Hz, 1H)              | 26.19                    |
|                 | 5'                 | 0.97                          | 23.1                     | CH              | 1.36 (dtt, <i>J</i> = 38.3, 11.3, 3.0 Hz, 1H) | 23.27                    |
|                 | 9'                 | 0.97                          | 23.1                     | CH              | 1.05 – 0.89 (m, 1H)                           | 23.27                    |
|                 | 12'                | 0.91                          | 22.2                     | CH <sub>3</sub> | 0.83 (t, <i>J</i> = 7.0 Hz, 3H)               | 21.95                    |
|                 | 11'                | 0.92                          | 21                       | CH <sub>3</sub> | 0.83 (t, <i>J</i> = 7.0 Hz, 3H)               | 20.76                    |
|                 | 14'                | 0.8                           | 16                       | CH <sub>3</sub> | 0.68 (d, <i>J</i> = 6.9 Hz, 3H)               | 16.23                    |
|                 | 7'                 | 1.35                          | --                       | --              | --                                            |                          |

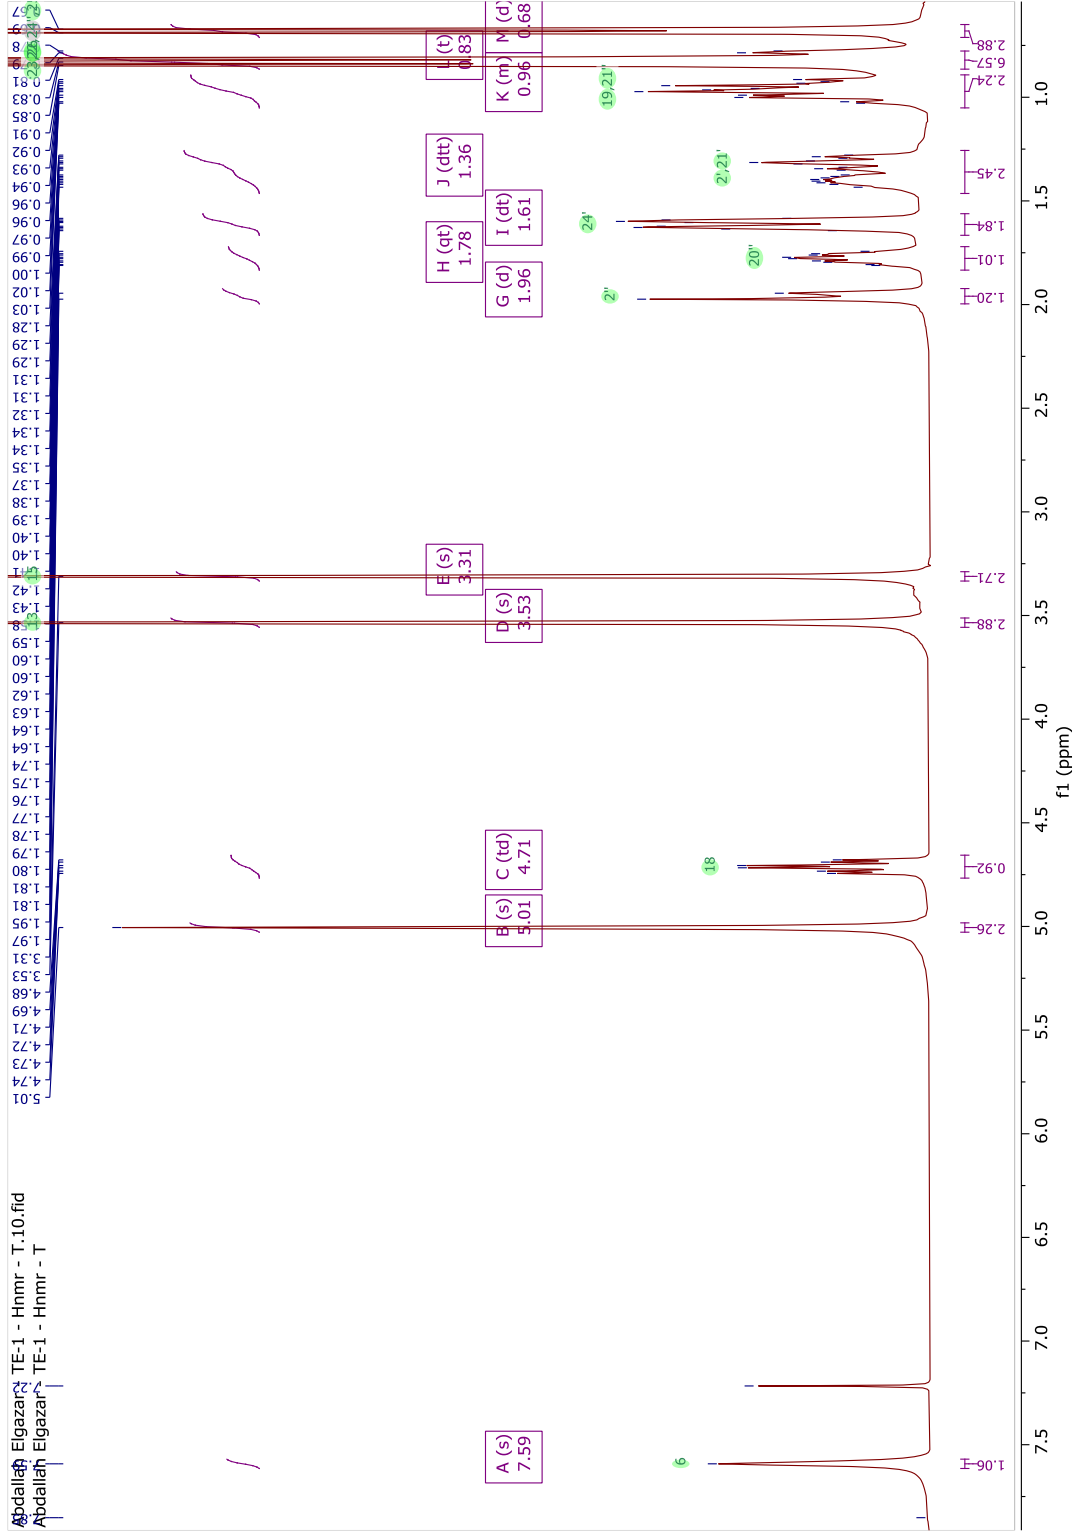

**<sup>1</sup>H NMR spectrum of compound 4a**

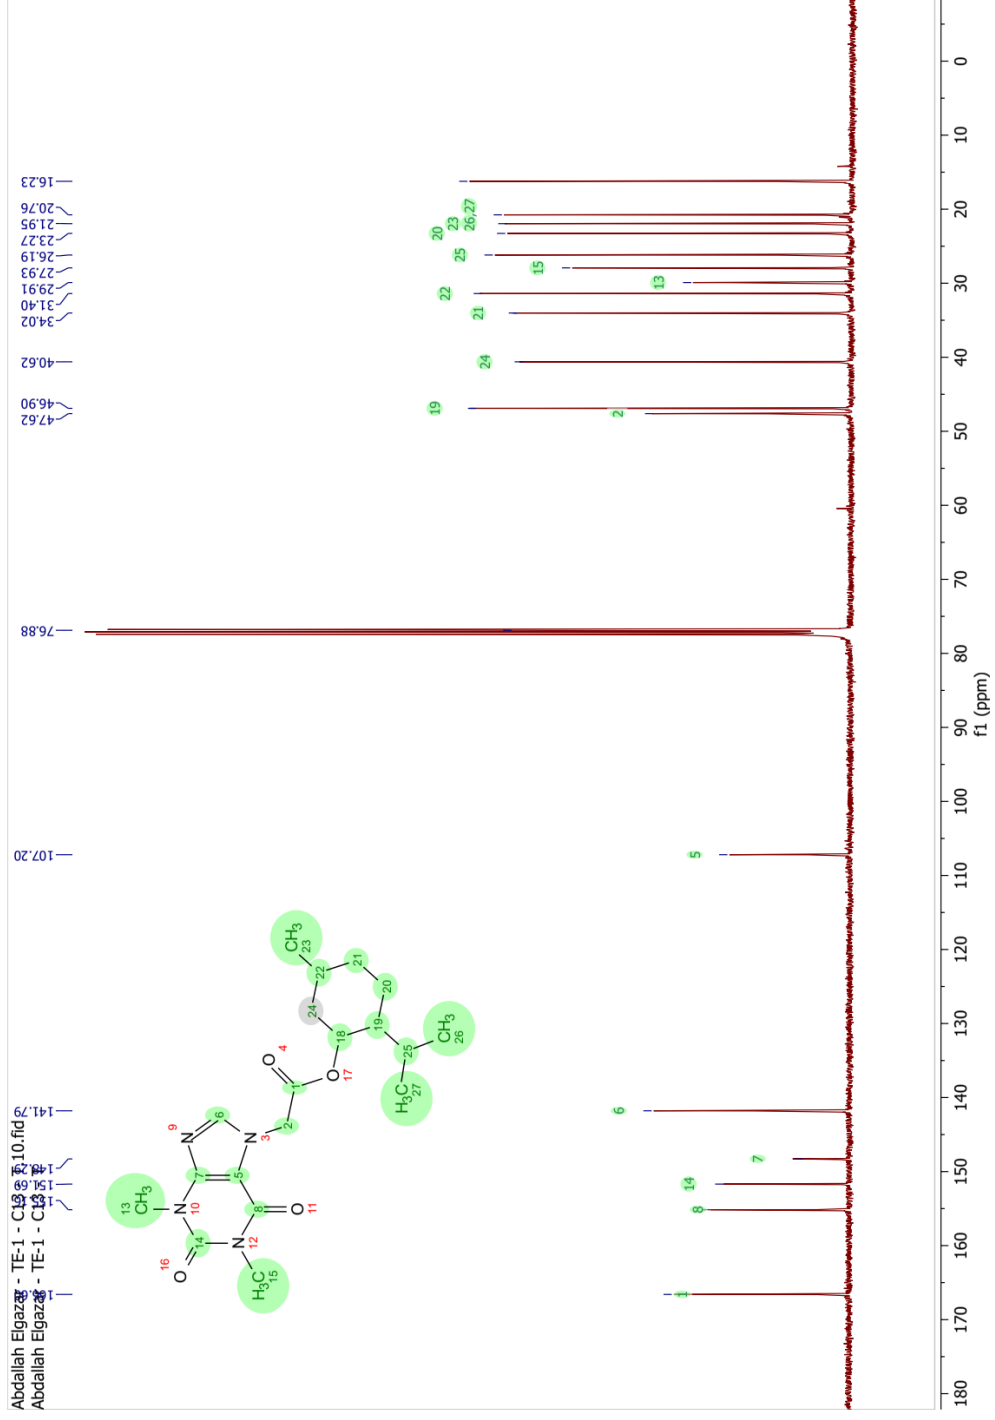

$^{13}\text{C}$  NMR spectrum of compound 4a

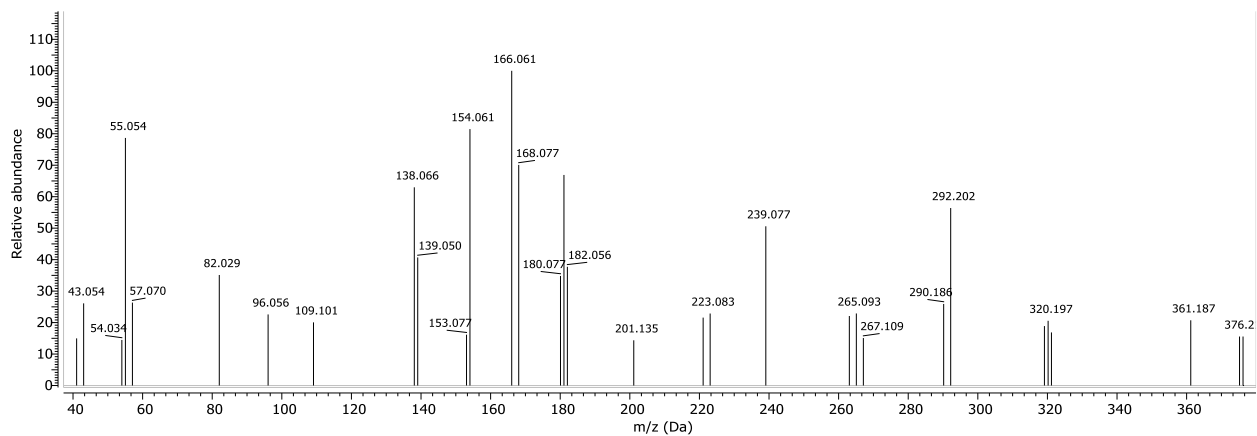

Mass spectrum of compound 4a

Table.S2 NMR assignment of ACEFYLLINE-thymol hybrid 4b

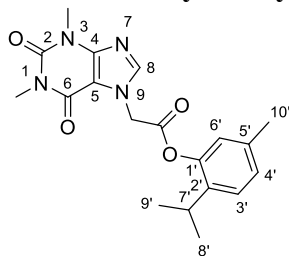

| Parent compound    |                                     |                             | Hybrid compound |                                       |                             |
|--------------------|-------------------------------------|-----------------------------|-----------------|---------------------------------------|-----------------------------|
| Atom<br>C/H        | <sup>1</sup> H(δ,<br>(J,Hz)<br>ppm) | <sup>13</sup> C<br>(δ, ppm) | DEPT            | <sup>1</sup> H(δ,ppm)(J,Hz)           | <sup>13</sup> C<br>(δ, ppm) |
| COOH               | 10                                  | 169.48                      | C               | --                                    | 165.80                      |
| 1                  | -                                   | 154.3                       | C               | --                                    | 155.19                      |
| 2                  | --                                  | 151.13                      | C               | --                                    | 151.57                      |
| 1 <sup>1</sup>     | -                                   | 150.2                       | C               | --                                    | 148.36                      |
| 3                  | --                                  | 148.36                      | C               | --                                    | 147.18                      |
| 4                  | 8.04                                | 143.63                      | CH              | 7.64 (d, <i>J</i> = 6.2 Hz, 1H)       | 141.61                      |
| 3'                 | -                                   | 138.4                       | C               | --                                    | 136.79                      |
| 6'                 | --                                  | 131.7                       | C               | --                                    | 136.70                      |
| 4'                 | 7.08                                | 126.3                       | CH              | 7.12 (dd, <i>J</i> = 8.0, 2.2 Hz, 1H) | 127.70                      |
| 5'                 | 7.08                                | 126.3                       | CH              | 7.00 – 6.93 (m, 1H)                   | 126.54                      |
| 2'                 | 5.4                                 | 116.9                       | CH              | 6.80 (d, <i>J</i> = 2.2 Hz, 1H)       | 122.14                      |
| 5                  | --                                  | 106.83                      | C               | --                                    | 107.12                      |
| CH <sub>2</sub> CO | 5.07                                | 47.6                        | CH <sub>2</sub> | 5.28 (d, <i>J</i> = 2.3 Hz, 2H)       | 47.44                       |
| 6                  | 3.44                                | 29.92                       | CH <sub>3</sub> | 3.53 (d, <i>J</i> = 2.2 Hz, 3H)       | 29.84                       |
| 7                  | 3.20                                | 27.9                        | CH <sub>3</sub> | 3.33 (d, <i>J</i> = 2.2 Hz, 3H)       | 27.87                       |
| 8'                 | 1.05                                | 26.1                        | CH <sub>3</sub> | 1.09 (dd, <i>J</i> = 6.9, 2.2 Hz, 3H) | 26.86                       |
| 9'                 | 1.05                                | 26.1                        | CH <sub>3</sub> | 1.09 (dd, <i>J</i> = 6.9, 2.2 Hz, 3H) | 26.86                       |
| 7'                 | 3.38                                | 25.5                        | CH              | 2.98 – 2.86 (m, 1H)                   | 23.00                       |
| 10'                | 2.2                                 | 18.7                        | CH <sub>3</sub> | 2.22 (s, 3H)                          | 20.73                       |

Abdallah Elgazar - TE-2 - Hnmr - T.10.fid  
 Abdallah Elgazar - TE-2 - Hnmr - T

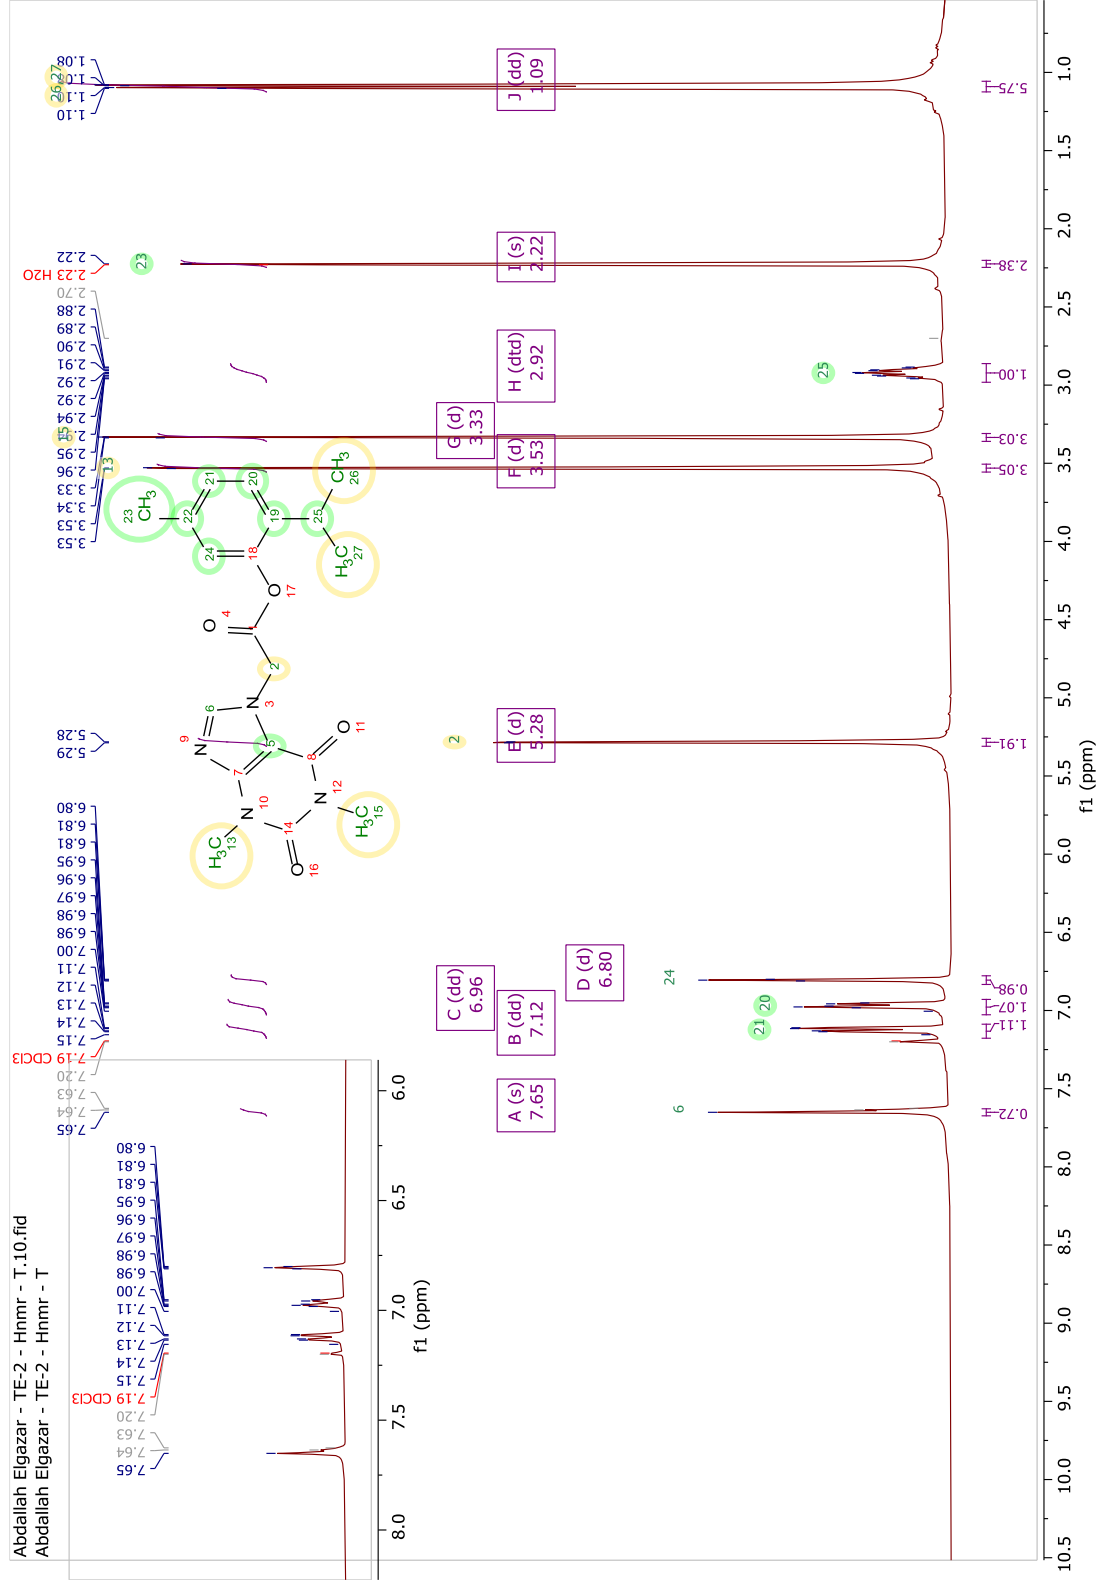

<sup>1</sup>H NMR spectrum of compound 4b

Abdallah Elgazaz - TE-2 - C13 - 010.tif  
 Abdallah Elgazaz - TE-2 - c13.mf

29.84  
 27.87  
 26.86  
 23.00  
 20.73

47.44

107.12

122.14  
 127.70  
 126.54

141.61  
 136.79  
 136.70

151.11  
 148.81  
 147.11  
 146.81

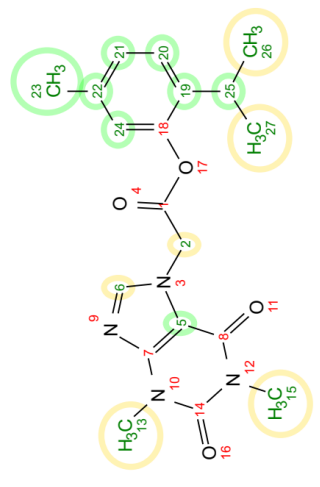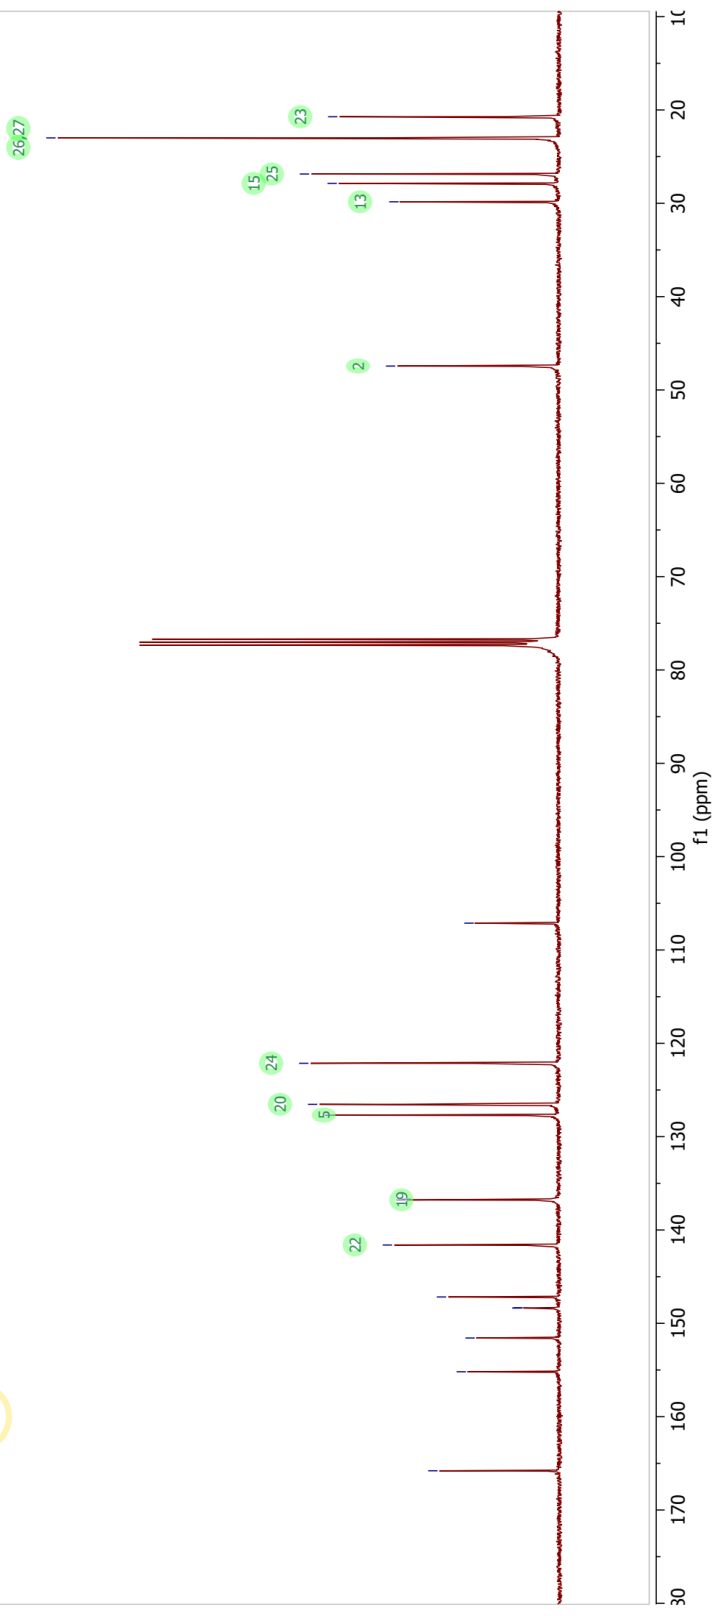

**<sup>13</sup>C NMR spectrum of compound 4b**



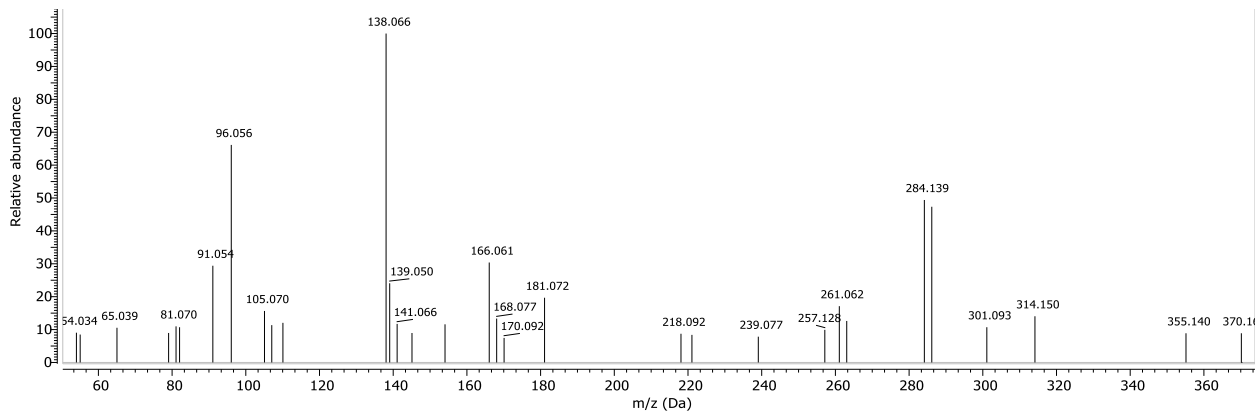

**Mass spectrum of compound 4b**

Table.S3 NMR assignment of ACEFYLLINE-vanillin hybrid **4c**

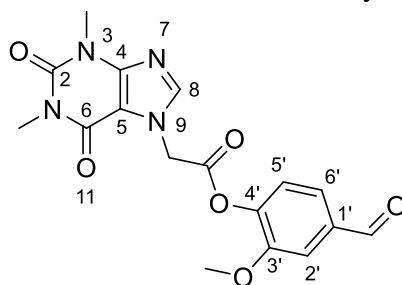

| Parent compound   |      |                                  |                             | Hybrid compound |                             |                             |
|-------------------|------|----------------------------------|-----------------------------|-----------------|-----------------------------|-----------------------------|
| C/H               | Atom | <sup>1</sup> H(δ, ppm)<br>(J,Hz) | <sup>13</sup> C<br>(δ, ppm) | DEPT            | <sup>1</sup> H(δ,ppm)(J,Hz) | <sup>13</sup> C<br>(δ, ppm) |
| HC=O              |      | 10.11                            | 191.2                       | CH              | 9.84 (s, 1H)                | 191.11                      |
| COOH              |      | 10                               | 169.48                      | C               | -                           | 168.80                      |
| 1                 |      | -                                | 154.3                       | C               | -                           | 156.26                      |
| 4'                |      | -                                | 152.18                      | C               | --                          | 151.67                      |
| 2                 |      | --                               | 151.13                      | C               | --                          | 151.67                      |
| 3                 |      | --                               | 148.36                      | C               | --                          | 148.99                      |
| 3'                |      | --                               | 147.5                       | C               | --                          | 148.99                      |
| 4                 |      | 8.04                             | 143.63                      | CH              | 7.85 (s, 1H)                | 140.23                      |
| 1 <sup>1</sup>    |      | --                               | 129.77                      | C               | --                          | 140.23                      |
| 6'                |      | 6.9 d(J=7.5)                     | 127.49                      | CH              | 7.06 (d, J = 8.5 Hz, 1H)    | 127.70                      |
| 5'                |      | 7.2                              | 114.75                      | CH              | 7.48 – 7.41 (m, 1H)         | 114.55                      |
| 2'                |      | 7.3 d(J=1.50)                    | 109.14                      | CH              | 7.48 – 7.41 (m, 1H)         | 107.03                      |
| 5                 |      | --                               | 106.83                      | C               | --                          | 107.03                      |
| -OCH3<br>vanillin |      | 3.84                             | 56.2                        | CH3             | 3.68 (s, 3H)                | 56.26                       |
| CH2CO             |      | 5.07                             | 47.6                        | CH2             | 3.98 (d, J = 5.1 Hz, 2H)    | 50.97                       |
| 6                 |      | 3.44                             | 29.92                       | CH3             | 3.51 (d, J = 5.9 Hz, 3H)    | 30.40                       |
| 7                 |      | 3.20                             | 27.9                        | CH3             | 3.51 (d, J = 5.9 Hz, 3H)    | 28.63                       |

Abdallah Elgazar - TE-3 - Hnmr - T.10.fid  
 Abdallah Elgazar - TE-3 - Hnmr - T

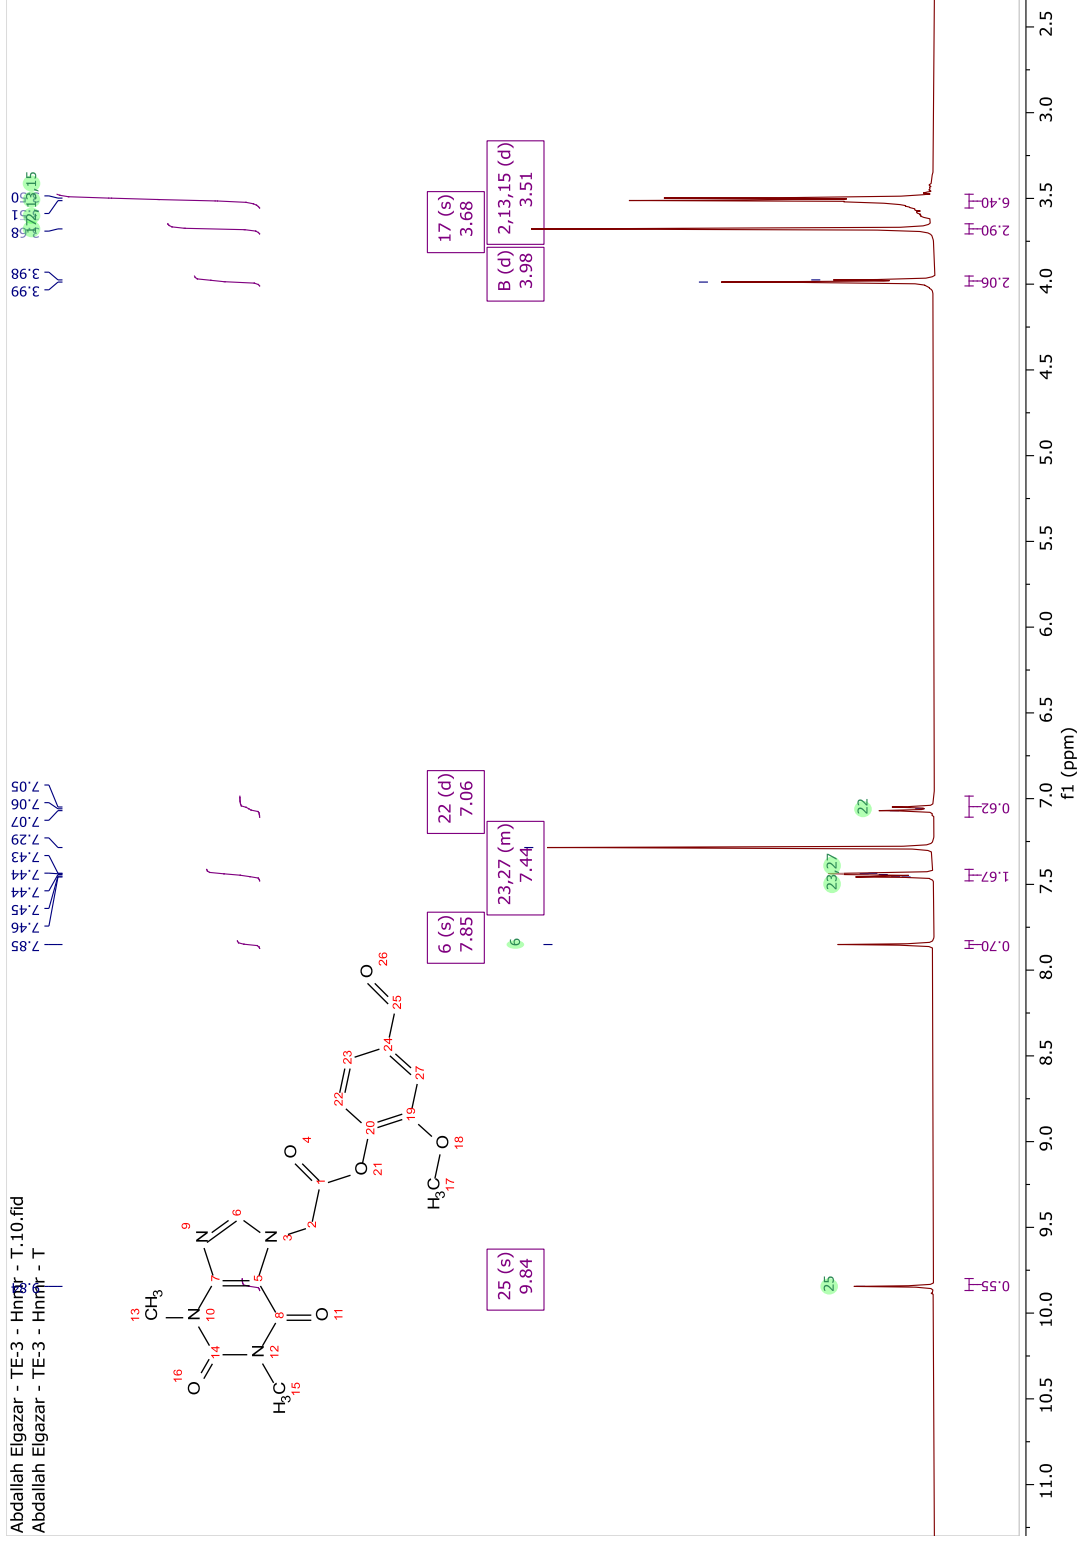

<sup>1</sup>H NMR spectrum of compound 4c

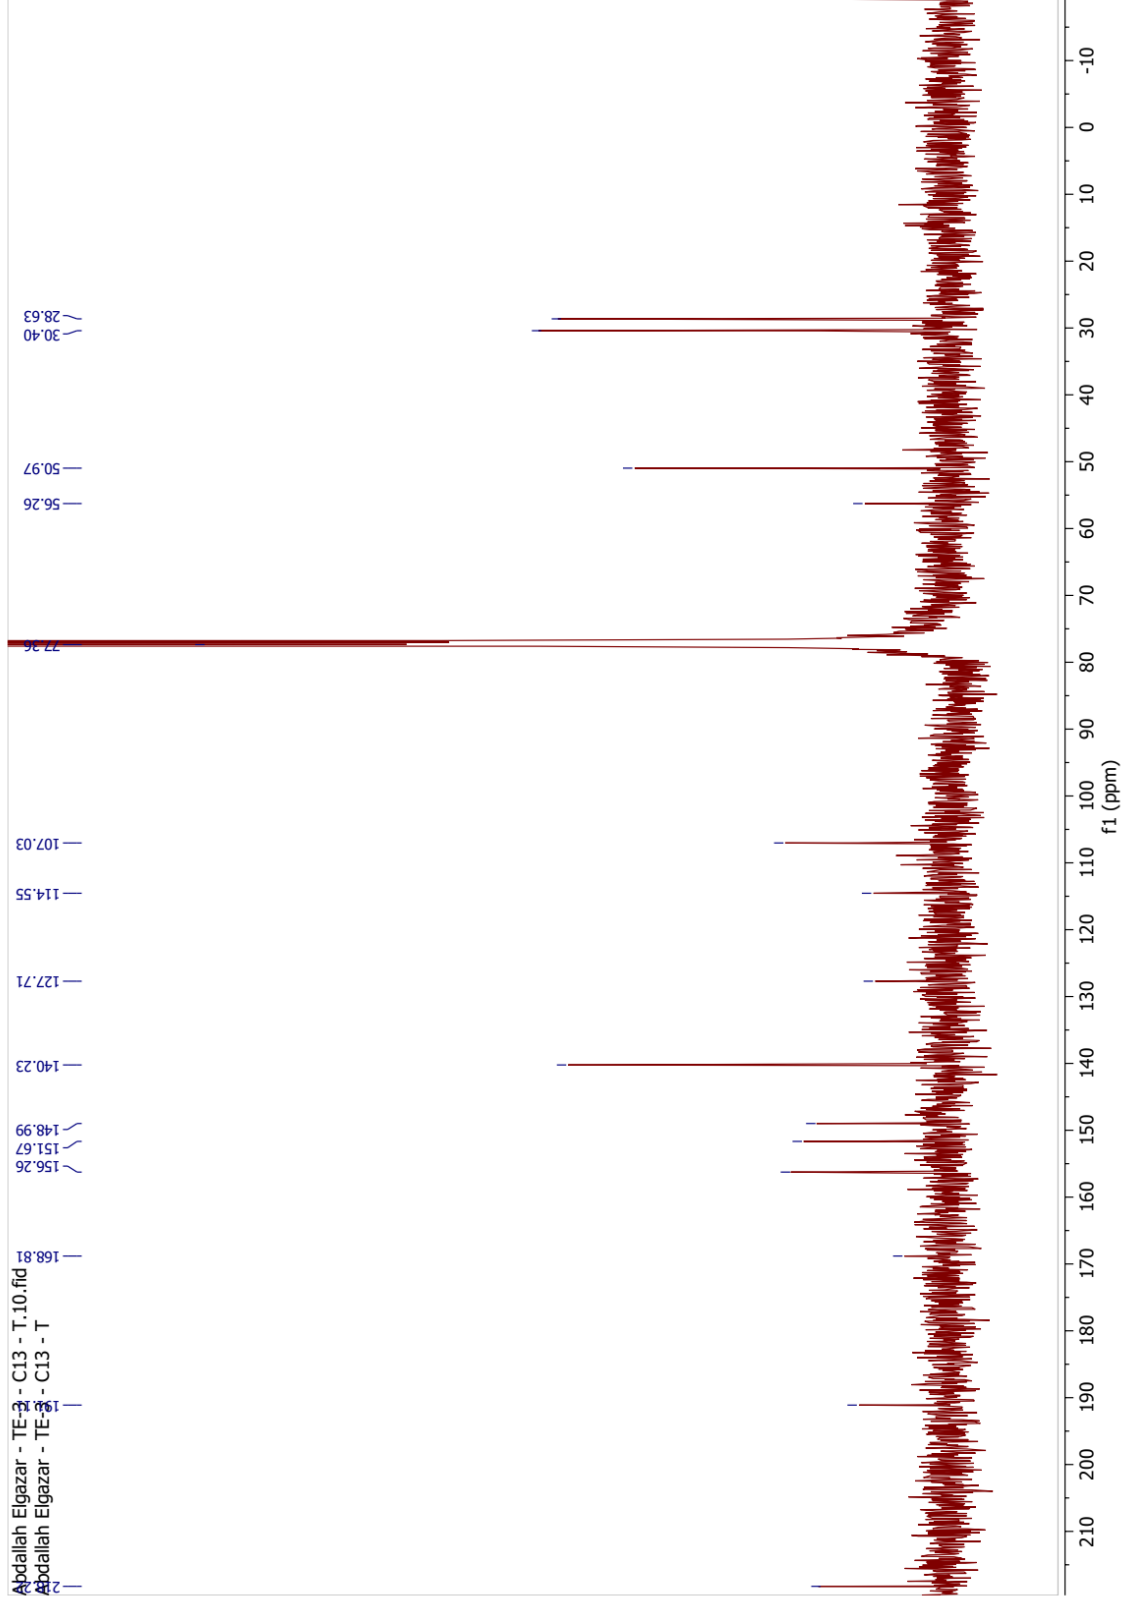

**<sup>13</sup>C NMR spectrum of compound 4c**

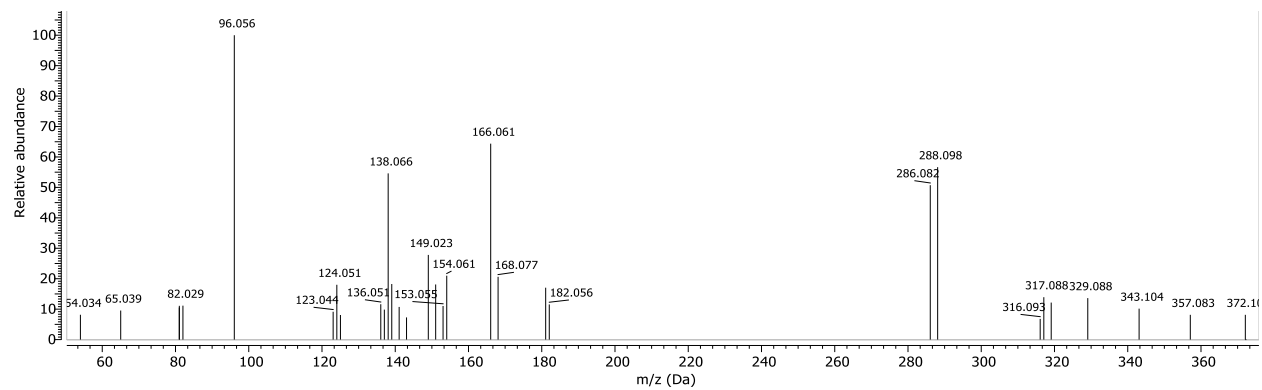

Mass spectrum of compound 4c

Table.S4 NMR assignment of ACEFYLLINE-menthol hybrid 4d

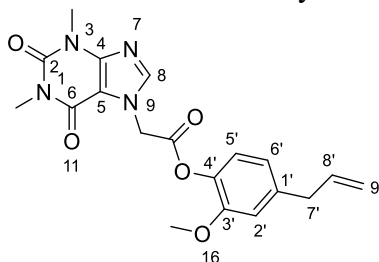

| Parent compound                 |      |                                  |                             | Hybrid compound |                                  |                             |
|---------------------------------|------|----------------------------------|-----------------------------|-----------------|----------------------------------|-----------------------------|
| C/H                             | Atom | <sup>1</sup> H(δ, ppm)<br>(J,Hz) | <sup>13</sup> C<br>(δ, ppm) | DEPT            | <sup>1</sup> H(δ,ppm)(J,Hz)      | <sup>13</sup> C<br>(δ, ppm) |
| COOH                            |      | 10                               | 169.48                      | C               | --                               | 165.49                      |
| 1                               |      | -                                | 154.3                       | C               |                                  | 155.29                      |
| 2                               |      | --                               | 151.13                      | C               | --                               | 151.70                      |
| 3                               |      | --                               | 148.36                      | C               | --                               | 150.41                      |
| 1 <sup>1</sup>                  |      | --                               | 146.6                       | C               | --                               | 148.50                      |
| 2'                              |      | --                               | 144.03                      | C               | --                               | 141.99                      |
| 4                               |      | 8.04                             | 143.63                      | CH              | 7.63 (s, 1H)                     | 139.76                      |
| -CH=<br>eugenol                 |      | 5.9                              | 137.9                       | CH              | 5.91 – 5.81 (m, 1H)              | 137.27                      |
| 5'                              |      | --                               | 131.94                      | C               | --                               | 136.85                      |
| 4'                              |      | 6.67                             | 121.2                       | CH              | 6.69 (d, <i>J</i> = 10.4 Hz, 1H) | 122.27                      |
| 3'                              |      | 6.82                             | 115.49                      | CH              | 6.96 (d, <i>J</i> = 7.8 Hz, 1H)  | 120.78                      |
| 6'                              |      | 6.66                             | 114.46                      | CH              | 6.69 (d, <i>J</i> = 10.4 Hz, 1H) | 116.35                      |
| EugenolCH=CH2-                  |      | 5.06, 5.04                       | 111.8                       | CH <sub>2</sub> | 5.06 – 4.98 (m, 2H)              | 112.74                      |
| 5                               |      | --                               | 106.83                      | C               | --                               | 107.16                      |
| -OCH <sub>3</sub> Eugenol       |      | 3.8                              | 55.8                        | CH <sub>3</sub> | 3.74 (s, 3H)                     | 55.85                       |
| CH <sub>2</sub> CO              |      | 5.07                             | 47.6                        | CH <sub>2</sub> | 5.30 (s, 2H)                     | 47.14                       |
| CH <sub>2</sub> -CH=<br>eugenol |      | 3.29                             | 39.9                        | CH <sub>2</sub> | 3.29 (d, <i>J</i> = 6.9 Hz, 2H)  | 40.05                       |
| 6                               |      | 3.44                             | 29.92                       | CH <sub>3</sub> | 3.52 (s, 3H)                     | 29.86                       |
| 7                               |      | 3.20                             | 27.9                        | CH <sub>3</sub> | 3.33 (s, 3H)                     | 27.96                       |

Abdallah Elbazar - TE-4 - Hnmr - T6.tif  
 Abdallah Elbazar - TE-4 - Hnmr - T6.tif

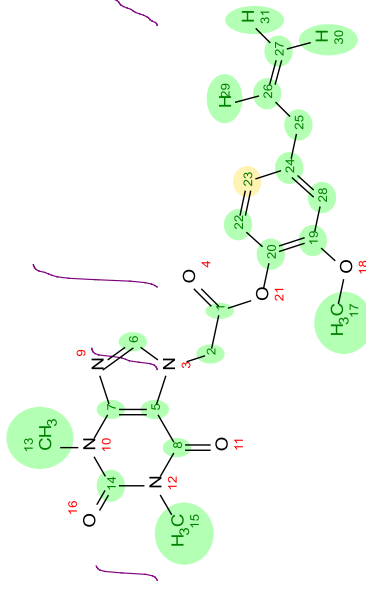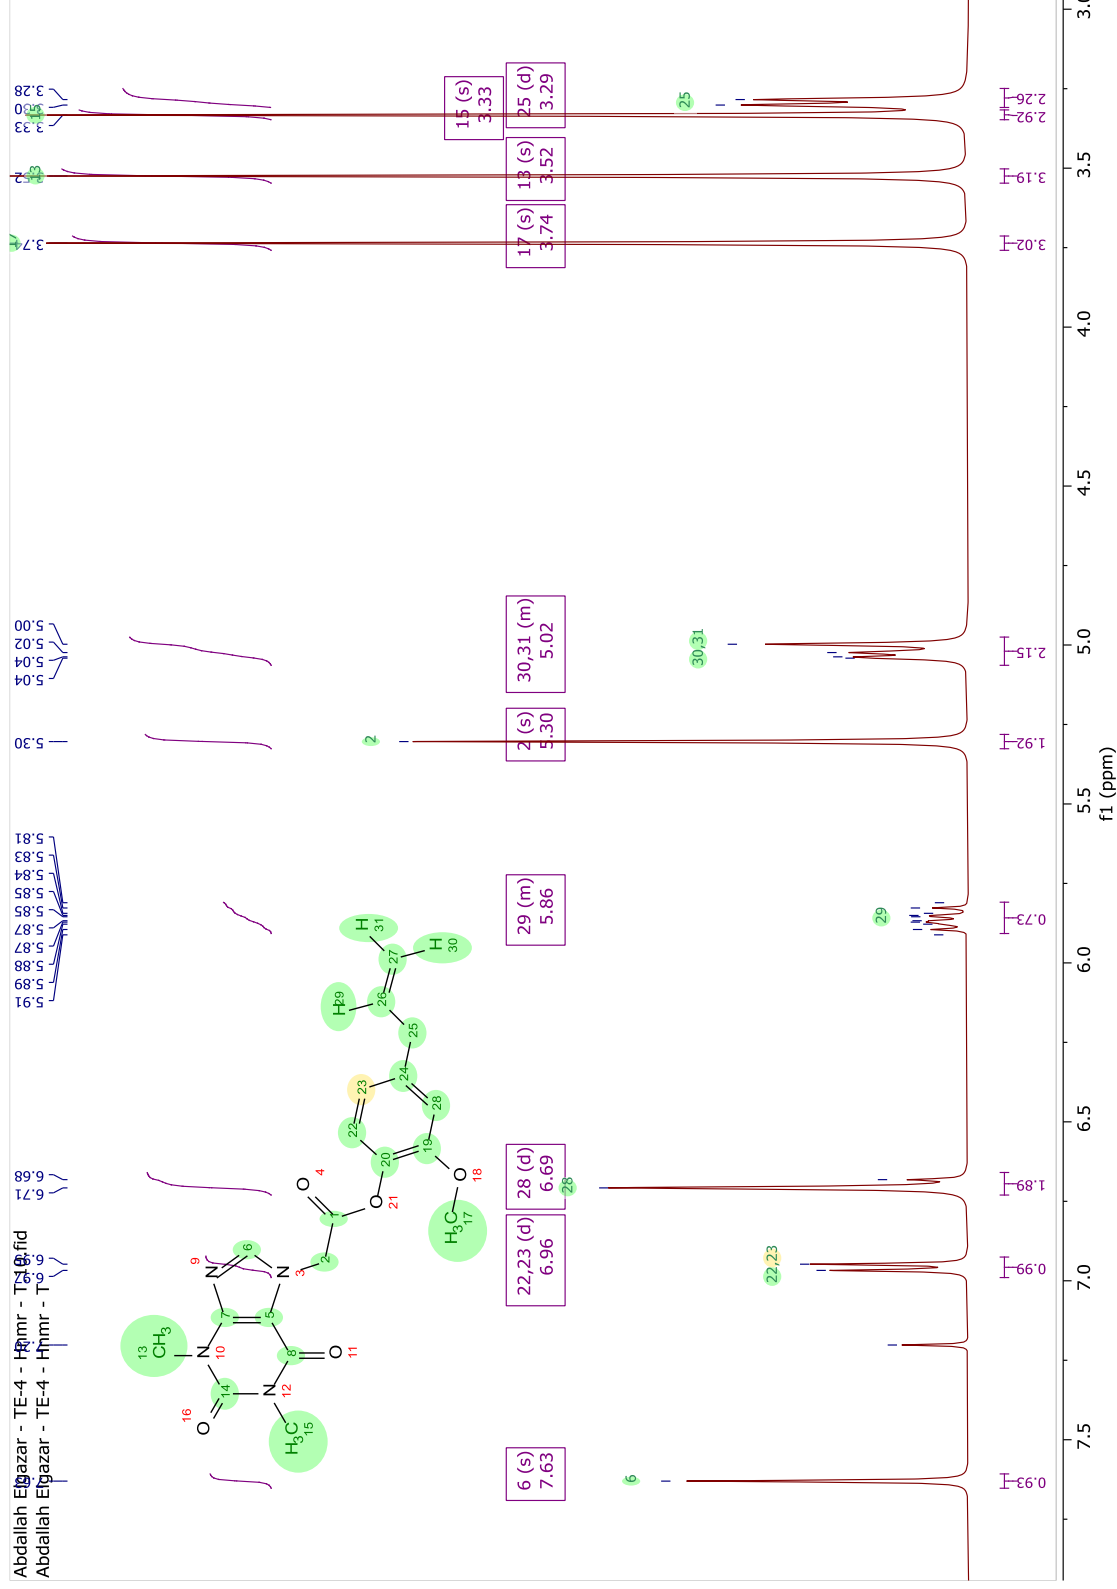

**<sup>1</sup>H NMR spectrum of compound 4d**

Abdallah Elgazar - TE-4 - 613 - 2010.fid  
 170.00  
 168.27  
 167.13  
 150.41  
 149.27  
 141.99  
 139.76  
 137.27  
 136.85  
 122.27  
 120.78  
 116.35  
 112.74  
 107.16

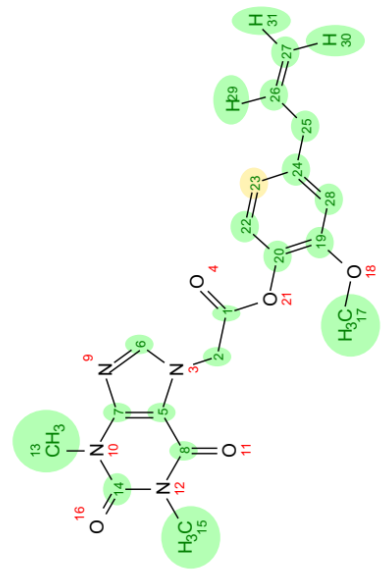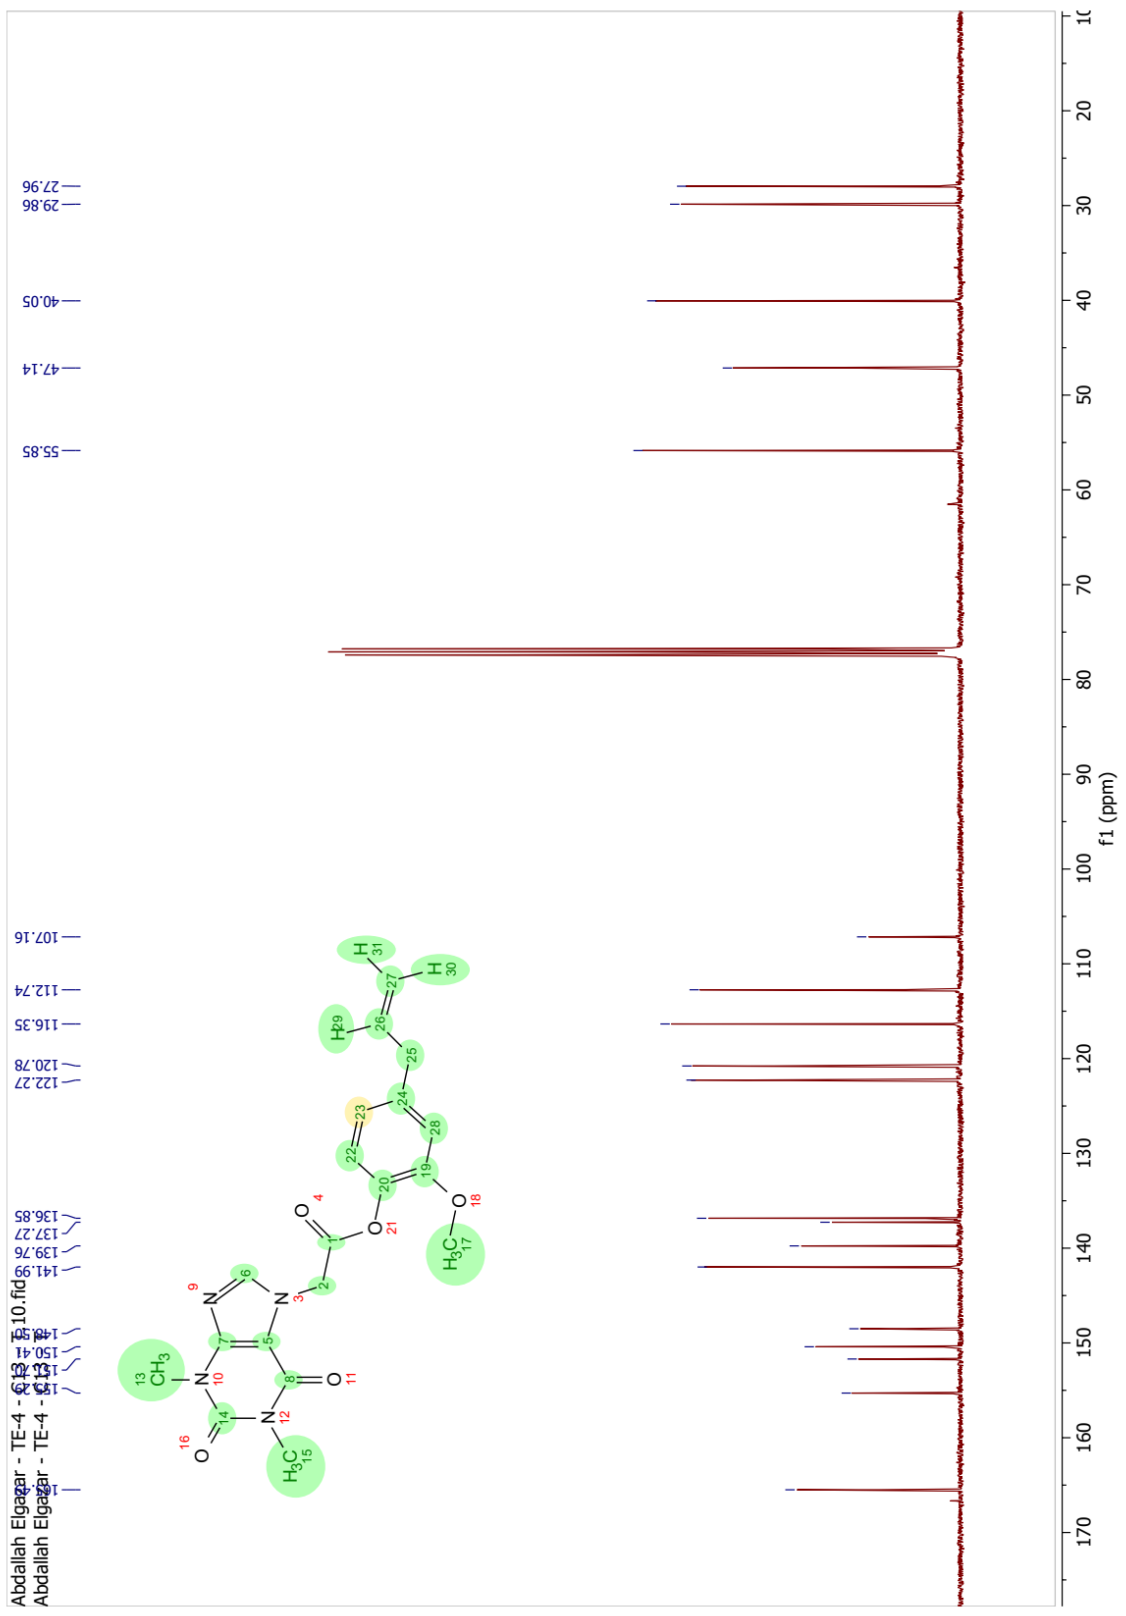

<sup>13</sup>C NMR spectrum of compound 4d

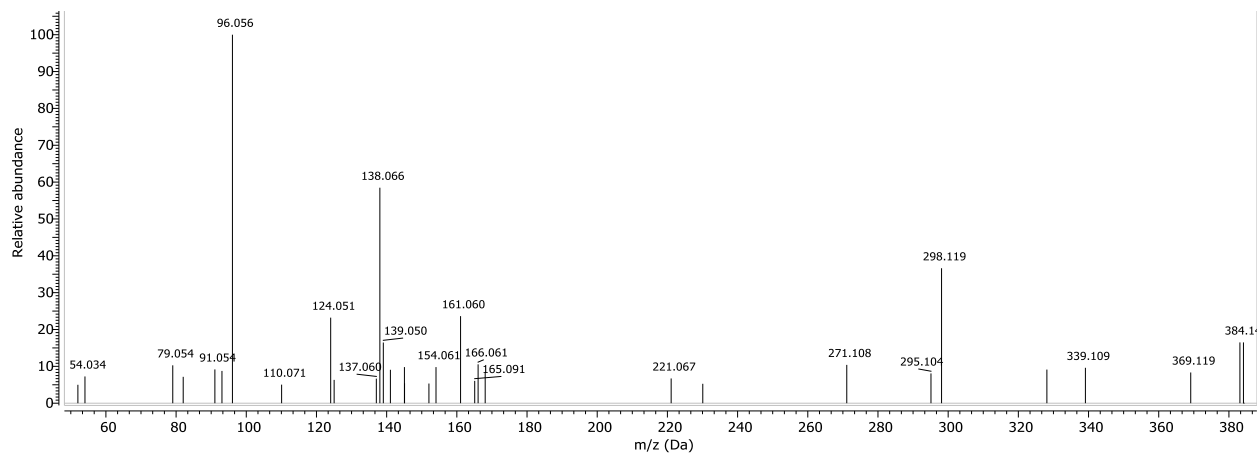

Mass spectrum of compound 4d

Table.S5 NMR assignment of ACEFYLLINE-acetyl-menthol hybrid 6a

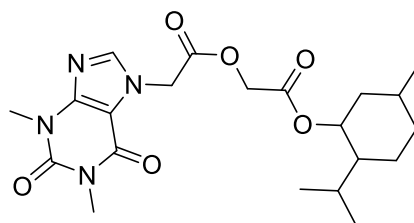

| Parent compound |                                  |                             | Hybrid compound |                                 |                             |
|-----------------|----------------------------------|-----------------------------|-----------------|---------------------------------|-----------------------------|
| Atom<br>C/H     | <sup>1</sup> H(δ, ppm)<br>(J,Hz) | <sup>13</sup> C<br>(δ, ppm) | DEPT            | <sup>1</sup> H(δ,ppm)(J,Hz)     | <sup>13</sup> C<br>(δ, ppm) |
| COOH            | --                               | 169.48                      | C               | ---                             | 166.68                      |
| C=O-Linker      | --                               | 165.6                       | C               |                                 | 166.57                      |
| 1               | -                                | 154.3                       | C               | --                              | 155.29                      |
| 2               | --                               | 151.13                      | C               | --                              | 151.64                      |
| 3               | --                               | 148.36                      | C               | --                              | 148.43                      |
| 4               | 8.04                             | 143.63                      | CH              | 7.63 (s, 1H)                    | 141.95                      |
| 5               | --                               | 106.83                      | C               | --                              | 107.06                      |
| 1'              | 3.4td(j=10.4,4.3)                | 71.5                        | CH              | 4.70 (td, J = 11.0, 4.5 Hz, 1H) | 76.21                       |
| CH2LINKER       | 4.9                              | 60                          | CH2             | 4.64 (s, 2H)                    | 61.92                       |
| 8'              | 1.1                              | 50.12                       | CH              | 1.47 – 1.26 (m, 1H)             | 47.09                       |
| CH2CO           | 5.07                             | 47.6                        | CH2             | 5.18 (s, 2H)                    | 46.89                       |
| 3'              | 1.9                              | 45                          | CH              | 1.79 – 1.67 (m, 1H)             | 40.67                       |
| 10'             | 0.95                             | 45                          | CH              | 1.06 – 0.90 (m, 1H)             | 40.67                       |
| 13'             | 0.84                             | 34.52                       | CH              | 0.82 (t, J = 7.0 Hz, 1H)        | 34.05                       |
| 4'              | 1.66                             | 34.5                        | CH              | 1.66 – 1.57 (m, 1H)             | 34.05                       |
| 6'              | 1.43                             | 31.6                        | CH              | 1.66 – 1.57 (m, 1H)             | 31.39                       |
| 6               | 3.44                             | 29.92                       | CH3             | 3.54 (s, 3H)                    | 29.94                       |
| 7               | 3.20                             | 27.9                        | CH3             | 3.32 (s, 3H)                    | 27.96                       |
| 2'              | 2.17                             | 25.8                        | CH              | 1.95 – 1.86 (m, 1H)             | 26.26                       |
| 5'              | 1.6                              | 23.1                        | CH              | 1.47 – 1.26 (m, 1H)             | 23.27                       |
| 9'              | 0.97                             | 23.1                        | CH              | 1.06 – 0.90 (m, 1H)             | 23.38                       |
| 12'             | 0.91                             | 22.2                        | CH3             | 0.82 (t, J = 7.0 Hz, 3H)        | 21.96                       |
| 11'             | 0.92                             | 21                          | CH3             | 0.82 (t, J = 7.0 Hz, 3H)        | 20.69                       |
| 14'             | 0.8                              | 16                          | CH3             | 0.67 (d, J = 7.0 Hz, 3H)        | 16.27                       |
| 7'              | 1.35                             | --                          | --              | --                              | --                          |





Abdallah Elgazar - TH-1 - Cl3 - T.11.fid  
Abdallah Elgazar - TH-1 - Cl3 - T

166.57  
166.68  
155.29  
151.64  
148.43  
141.95  
107.06  
76.21  
61.92  
47.09  
46.89  
40.67  
34.05  
31.39  
29.94  
27.96  
26.26  
23.38  
21.96  
20.69  
16.27

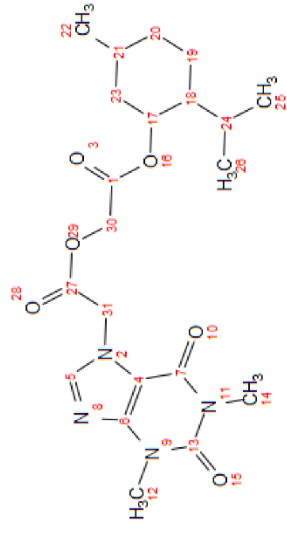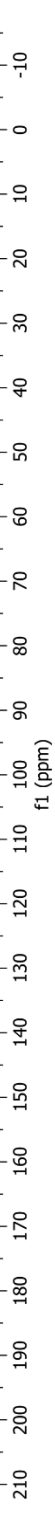

<sup>13</sup>C NMR spectrum of compound 6a

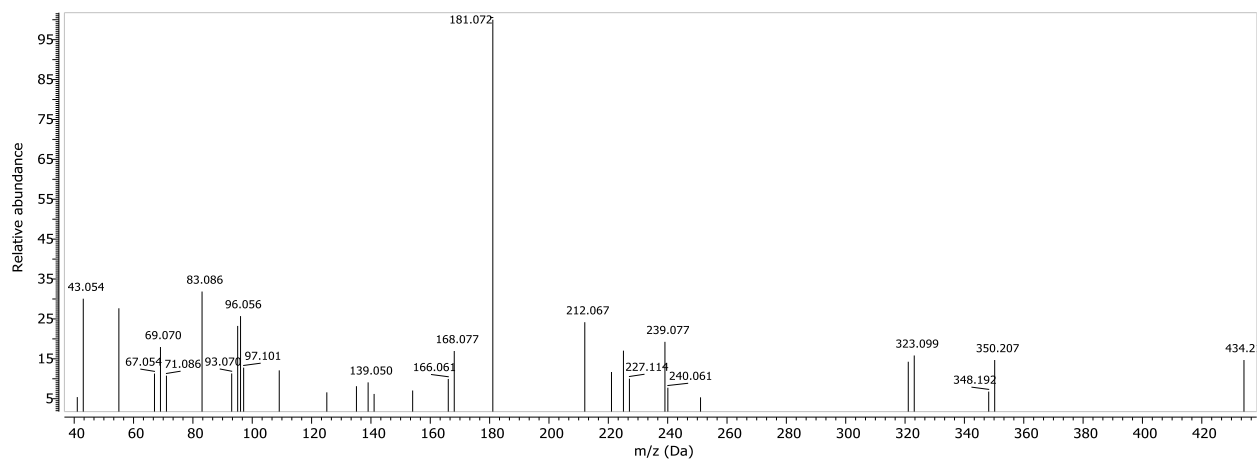

Mass spectrum of compound 6a

Table.S6 NMR assignment of ACEFYLLINE-acetyl-thymyl hybrid 6b

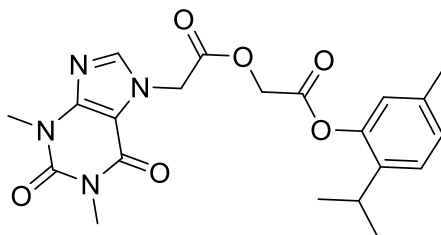

| Parent compound        |                                  |                         | Hybrid compound |                                        |                         |
|------------------------|----------------------------------|-------------------------|-----------------|----------------------------------------|-------------------------|
| Atom C/H               | <sup>1</sup> H(δ, ppm)<br>(J,Hz) | <sup>13</sup> C(δ, ppm) | DEPT            | <sup>1</sup> H(δ, ppm)<br>(J,Hz)       | <sup>13</sup> C(δ, ppm) |
| COOH                   | 10                               | 169.48                  | C               | --                                     | 166.73                  |
| 4                      | 8.04                             | 143.63                  | CH              | 7.60 (s, 1H)                           | 141.89                  |
| 4'                     | 7.08                             | 126.3                   | CH              | 7.13 (d, <i>J</i> = 7.9 Hz, 1H)        | 127.77                  |
| 5'                     | 7.08                             | 126.3                   | CH              | 6.98 (dd, <i>J</i> = 8.0, 1.8 Hz, 1H)  | 126.69                  |
| 2'                     | 5.4                              | 116.9                   | CH              | 6.77 – 6.70 (m, 1H)                    | 122.25                  |
| CH <sub>2</sub> CO     | 5.07                             | 47.6                    | CH <sub>2</sub> | 5.19 (s, 2H)                           | 47.09                   |
| CH <sub>2</sub> LINKER | 4.9                              | 60                      | CH <sub>2</sub> | 4.94 (s, 2H)                           | 61.71                   |
| 6                      | 3.44                             | 29.92                   | CH <sub>3</sub> | 3.53 (s, 3H)                           | 29.94                   |
| 7'                     | 3.38                             | 25.5                    | CH              | 2.85 (dt, <i>J</i> = 13.7, 6.8 Hz, 1H) | 23.02                   |
| 7                      | 3.20                             | 27.9                    | CH <sub>3</sub> | 3.33 (d, <i>J</i> = 2.2 Hz, 3H)        | 27.93                   |
| 10'                    | 2.2                              | 18.7                    | CH <sub>3</sub> | 2.23 (s, 3H)                           | 20.79                   |
| 8'                     | 1.05                             | 26.1                    | CH <sub>3</sub> | 1.09 (d, <i>J</i> = 6.9 Hz, 3H)        | 27.06                   |
| 9'                     | 1.05                             | 26.1                    | CH <sub>3</sub> | 1.09 (d, <i>J</i> = 6.9 Hz, 3H)        | 27.06                   |
| CO-LINKER              | --                               | 165.6                   | C               | --                                     | 165.92                  |
| 1                      | -                                | 154.3                   | C               | --                                     | 155.30                  |
| 2                      | --                               | 151.13                  | C               | --                                     | 151.61                  |
| 1 <sup>1</sup>         | -                                | 150.2                   | C               | --                                     | 148.44                  |
| 3                      | --                               | 148.36                  | C               | --                                     | 147.04                  |
| 3'                     | -                                | 138.4                   | C               | --                                     | 136.89                  |
| 6'                     | --                               | 131.7                   | C               | --                                     | 136.87                  |
| 5                      | --                               | 106.83                  | C               | --                                     | 107.5                   |



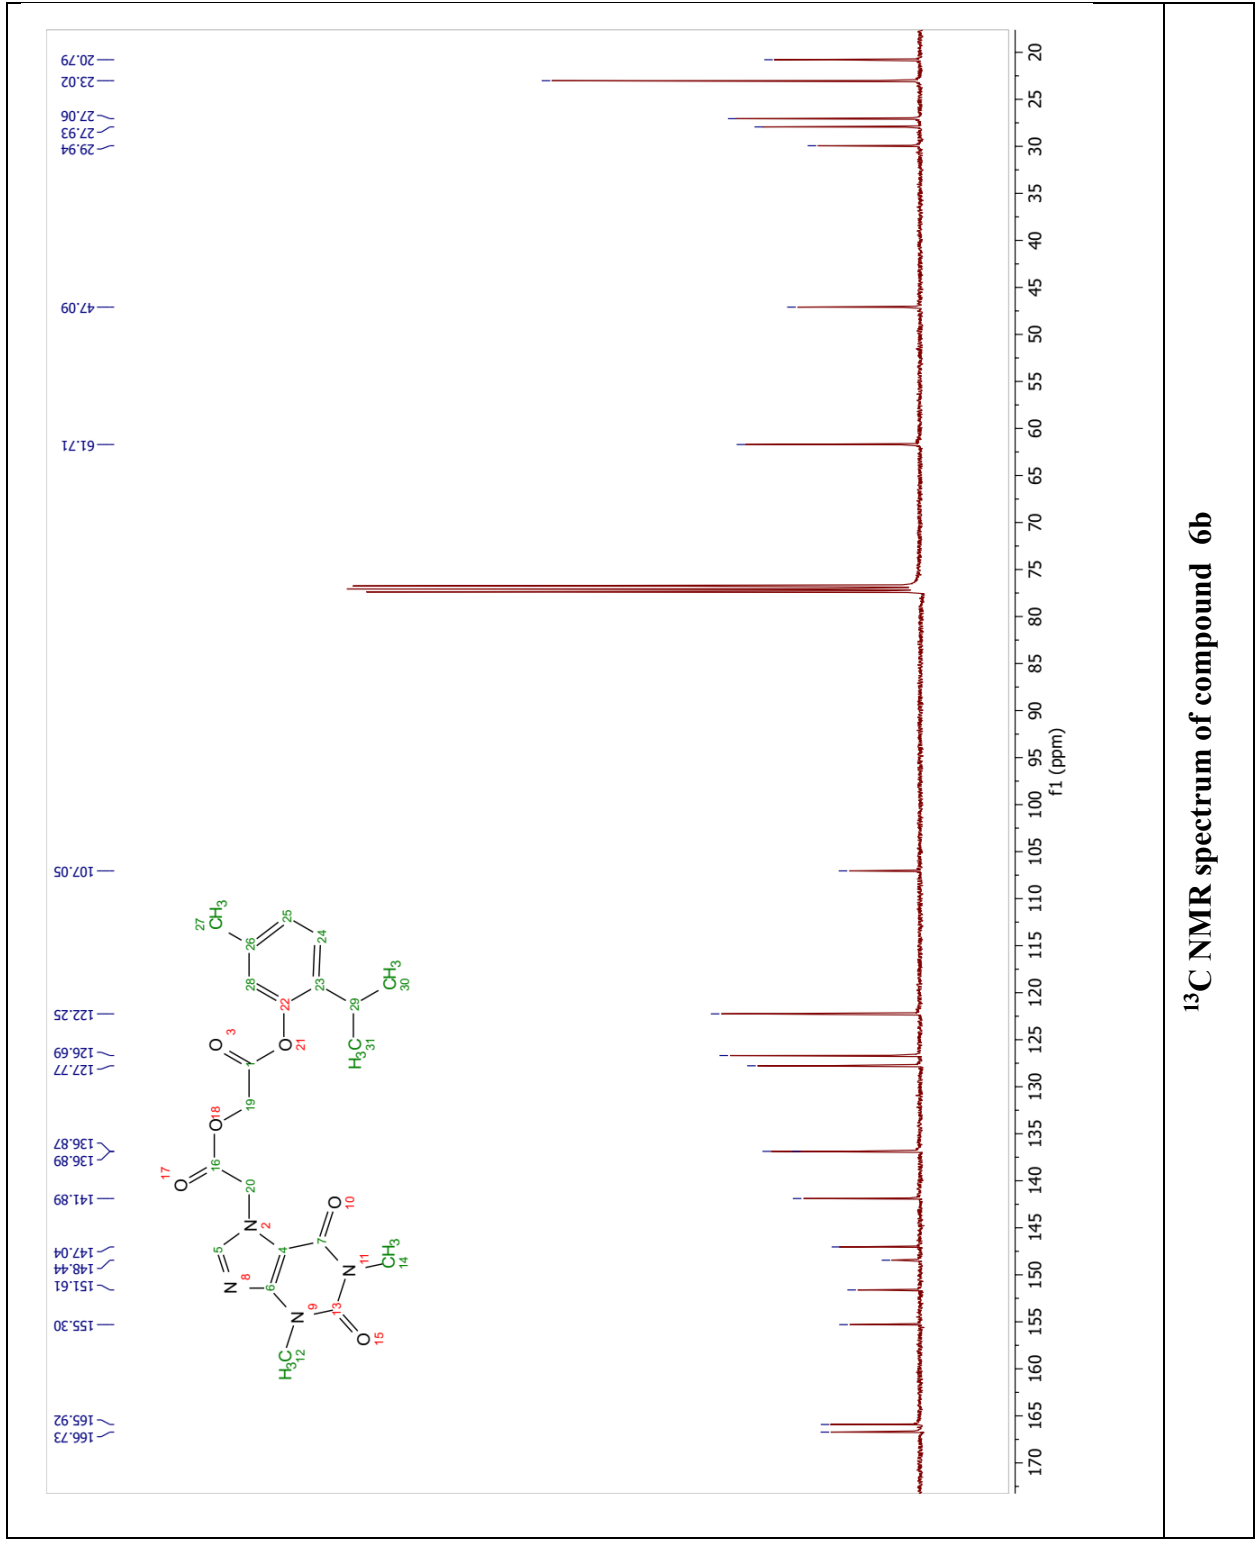

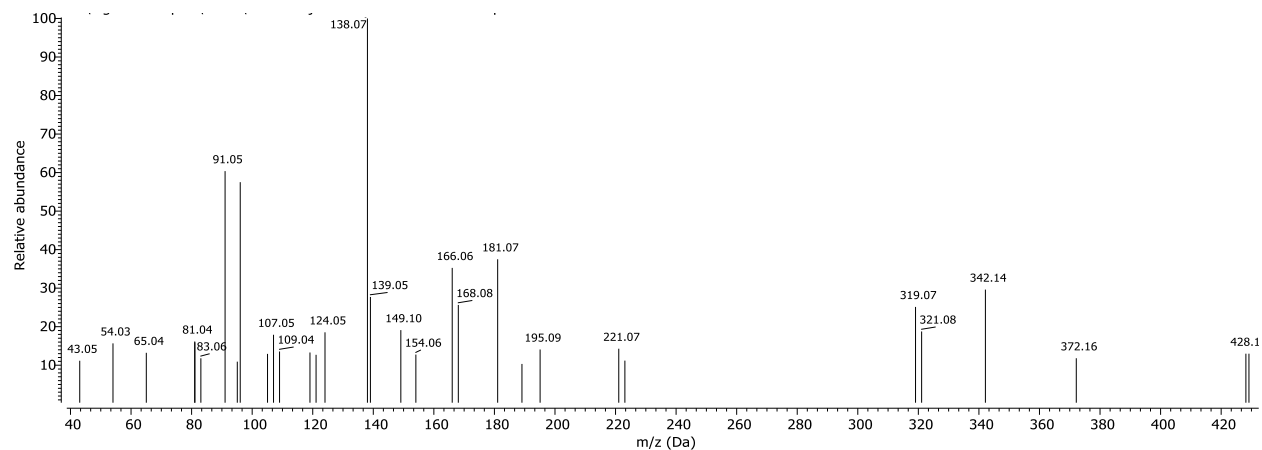

Mass spectrum of compound 6b

Table.S7 NMR assignment of ACEFYLLINE-acetyl-vanillin hybrid 6c

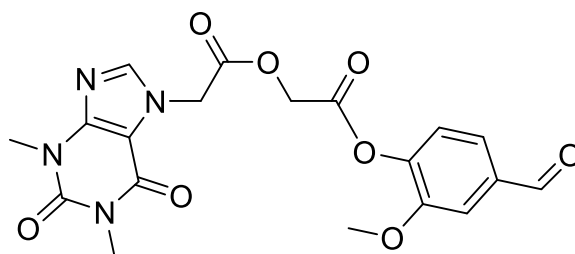

| Parent compound |      |                              |                         | Hybrid compound |                                |                         |
|-----------------|------|------------------------------|-------------------------|-----------------|--------------------------------|-------------------------|
| C/H             | Atom | <sup>1</sup> H(δ, ppm)(J,Hz) | <sup>13</sup> C(δ, ppm) | DEPT            | <sup>1</sup> H(δ,ppm)(J,Hz)    | <sup>13</sup> C(δ, ppm) |
| HC=O            |      | 10.11                        | 191.2                   | CH              | 9.88 (s, 1H)                   | 190.95                  |
| COOH            |      | 10                           | 169.48                  | C               | -                              | 166.61                  |
| CO-LINKER       |      | --                           | 165.6                   | C               | --                             | 164.67                  |
| 1               |      | -                            | 154.3                   | C               | -                              | 155.32                  |
| 4'              |      | -                            | 152.18                  | C               | --                             | 151.62                  |
| 2               |      | --                           | 151.13                  | C               | --                             | 148.55                  |
| 3               |      | --                           | 148.36                  | C               | --                             | 148.51                  |
| 3'              |      | --                           | 147.5                   | C               | --                             | 143.78                  |
| 4               |      | 8.04                         | 143.63                  | CH              | 7.61 (d, J = 1.8 Hz, 1H)       | 141.94                  |
| 1 <sup>1</sup>  |      | --                           | 129.77                  | C               | --                             | 135.66                  |
| 6'              |      | 6.9d(J=7.5)                  | 127.49                  | CH              | 7.18 (dd, J = 7.9, 3.0 Hz, 1H) | 124.66                  |
| 5'              |      | 7.2                          | 114.75                  | CH              | 7.42 (dt, J = 9.7, 1.6 Hz, 1H) | 123.17                  |
| 2'              |      | 7.3 d(J=1.50)                | 109.14                  | CH              | 7.42 (dt, J = 9.7, 1.6 Hz, 2H) | 110.94                  |
| 5               |      | --                           | 106.83                  | C               | --                             | 107.06                  |
| CH2-LINKER      |      | 4.9                          | 60                      | CH2             | 4.97 (d, J = 17.3 Hz, 2H)      | 61.36                   |
| -OCH3vanillin   |      | 3.84                         | 56.2                    | CH3             | 3.83 (d, J = 3.9 Hz, 3H)       | 56.20                   |
| CH2CO           |      | 5.07                         | 47.6                    | CH2             | 5.25 – 5.15 (m, 2H)            | 47.07                   |
| 6               |      | 3.44                         | 29.92                   | CH3             | 3.53 (s, 3H)                   | 29.91                   |
| 7               |      | 3.20                         | 27.9                    | CH3             | 3.30 (d, J = 2.1 Hz, 3H)       | 27.94                   |

AbdallaElgazar - TH-3 - Hnmr - T-10.fid

AbdallaElgazar - TH-3 - Hnmr - T

7.62  
7.61  
7.43  
7.43  
7.43  
7.42  
7.41  
7.40  
7.40  
7.20  
7.19  
7.18  
7.17

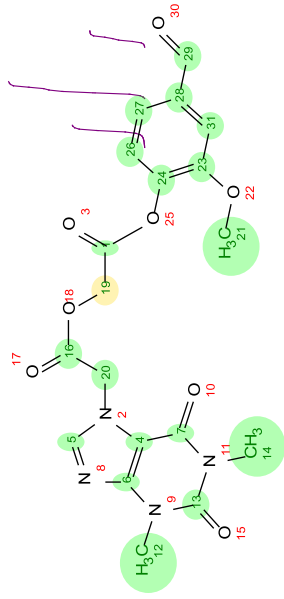

5.20  
5.18  
5.18  
5.17  
4.99  
4.94  
3.83  
3.82  
3.53  
3.31  
3.30

29 (s) 9.88  
31 (d) 7.61  
27 (dd) 7.18  
5,26 (dt) 7.42  
F (d) 4.97  
E (m) 5.18  
G (d) 3.83  
12,14,21 (s) 3.53  
19,20 (c) 1.99, 2.01  
12,14,21 (c) 3.30

0.99  
1.15  
2.17  
0.87  
2.15  
1.96  
2.64  
2.85  
3.22

10.0 9.5 9.0 8.5 8.0 7.5 7.0 6.5 6.0 5.5 5.0 4.5 4.0 3.5

f1 (ppm)

**<sup>1</sup>H NMR spectrum of compound 6c**

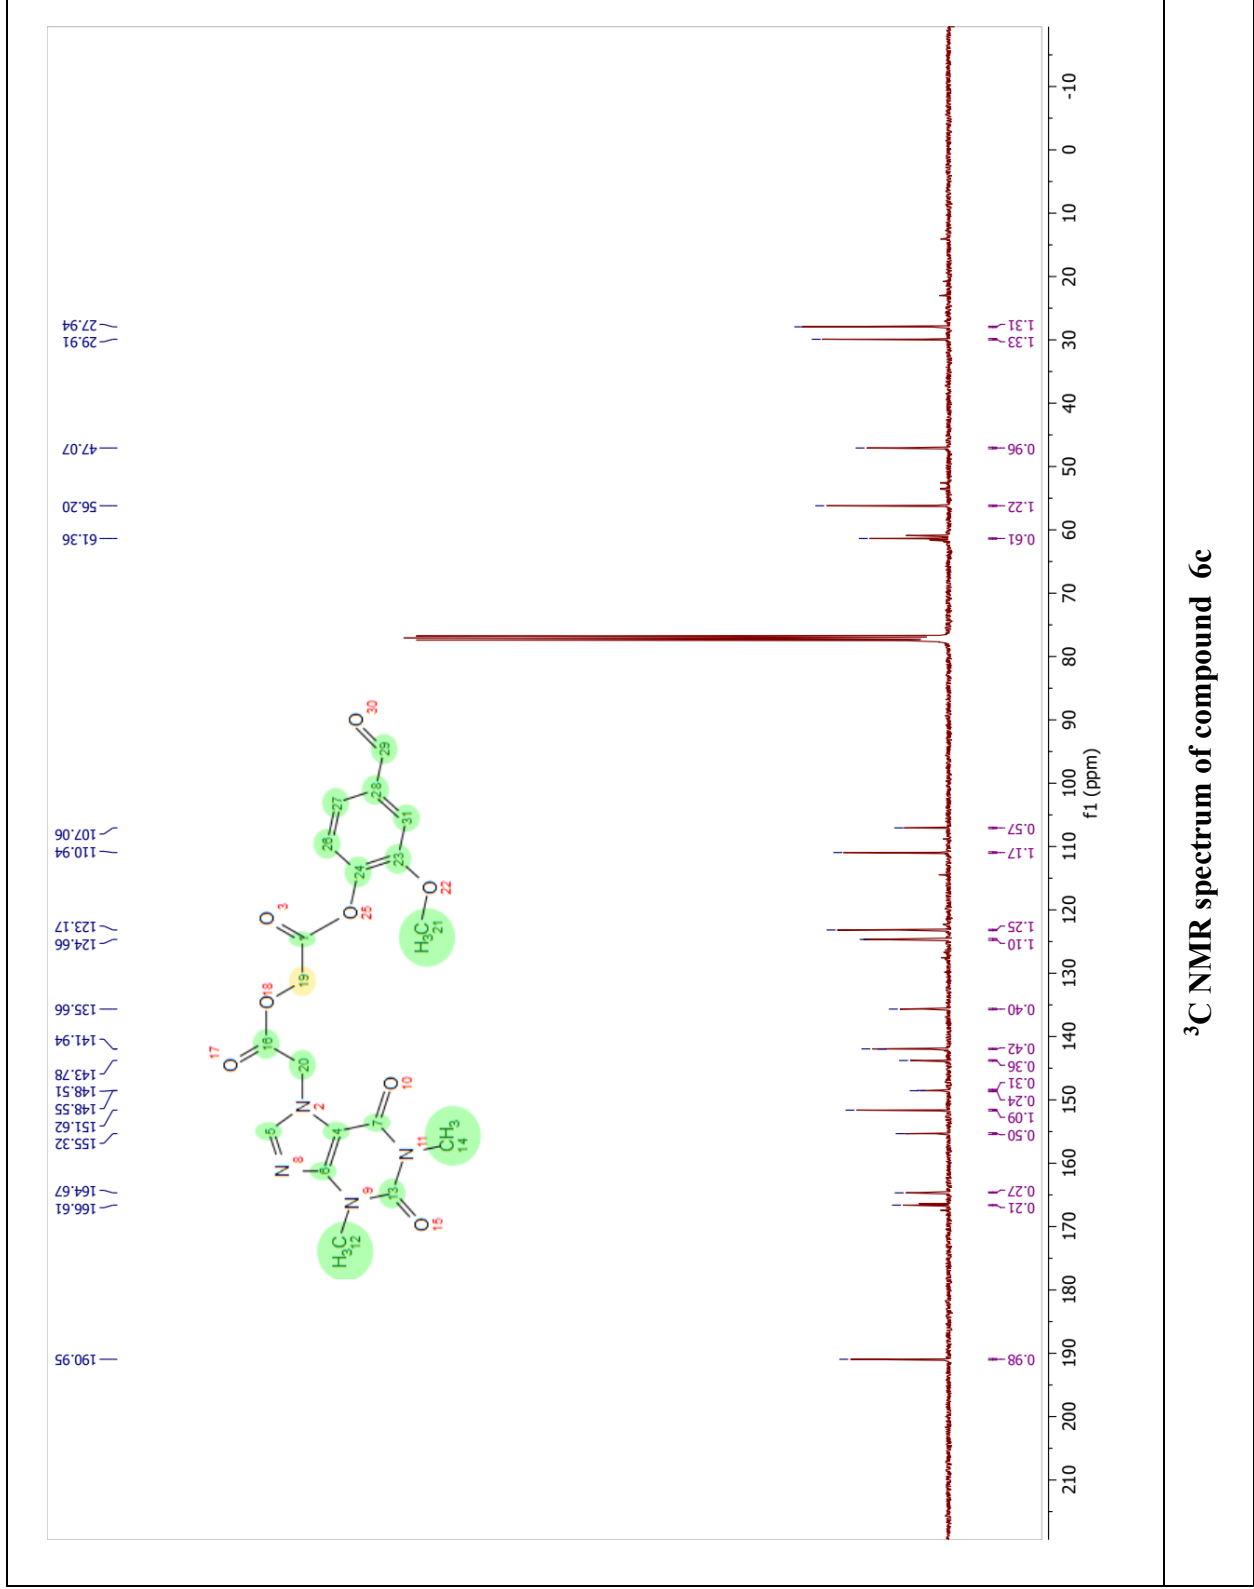

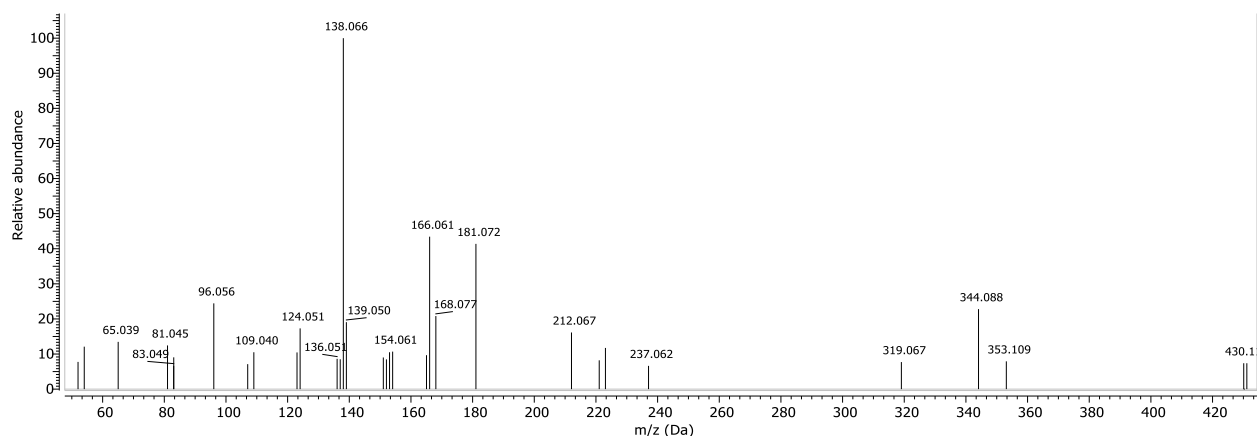

Mass spectrum of compound 6c

Table.s8 NMR assignment of acefylline-acetyl-eugenol hybrid 6d

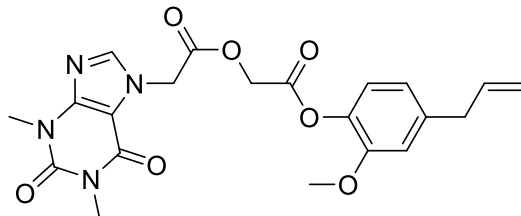

| C/H                         | Parent compound |                               |                          | Hybrid compound |                             |                          |
|-----------------------------|-----------------|-------------------------------|--------------------------|-----------------|-----------------------------|--------------------------|
|                             | Atom            | <sup>1</sup> H(δ, (J,Hz) ppm) | <sup>13</sup> C (δ, ppm) | DEPT            | <sup>1</sup> H(δ,ppm)(J,Hz) | <sup>13</sup> C (δ, ppm) |
| COOH                        |                 | 10                            | 169.48                   | C               | --                          | 166.61                   |
| 4                           |                 | 8.04                          | 143.63                   | CH              | 7.59 (s, 1H)                | 139.74                   |
| 3'                          |                 | 6.82                          | 115.49                   | CH              | 6.89 (d, J = 8.0 Hz, 1H)    | 120.73                   |
| 4'                          |                 | 6.67                          | 121.2                    | CH              | 6.74 – 6.66 (m, 1H)         | 122.19                   |
| 6'                          |                 | 6.66                          | 114.46                   | CH              | 6.74 – 6.66 (m, 1H)         | 116.35                   |
| -CH=eugenol                 |                 | 5.9                           | 137.9                    | CH              | 5.93 – 5.82 (m, 1H)         | 137.04                   |
| CH <sub>2</sub> CO          |                 | 5.07                          | 47.6                     | CH <sub>2</sub> | 5.18 (s, 2H)                | 47.03                    |
| Eugeno-CH=CH <sub>2</sub>   |                 | 5.06, 5.04                    | 111.8                    | CH <sub>2</sub> | 5.08 – 4.98 (m, 2H)         | 112.79                   |
| CH <sub>2</sub> -LINKER     |                 | 4.9                           | 60                       | CH <sub>2</sub> | 4.95 (s, 2H)                | 61.55                    |
| OCH <sub>3</sub> Eugenol    |                 | 3.8                           | 55.8                     | CH <sub>3</sub> | 3.73 (s, 3H)                | 55.85                    |
| 6                           |                 | 3.44                          | 29.92                    | CH <sub>3</sub> | 3.53 (s, 3H)                | 29.92                    |
| CH <sub>2</sub> -CH=eugenol |                 | 3.29                          | 39.9                     | CH <sub>2</sub> | 3.36 – 3.27 (m, 2H)         | 40.07                    |
| 7                           |                 | 3.20                          | 27.9                     | CH <sub>3</sub> | 3.30 (s, 3H)                | 27.94                    |
| CO-LINKER                   |                 | --                            | 165.6                    | C               | --                          | 165.38                   |
| 1                           |                 | -                             | 154.3                    | C               | --                          | 155.31                   |
| 2                           |                 | --                            | 151.13                   | C               | --                          | 151.63                   |
| 3                           |                 | --                            | 148.36                   | C               | --                          | 150.50                   |
| 1 <sup>1</sup>              |                 | --                            | 146.6                    | C               | --                          | 148.47                   |
| 2'                          |                 | --                            | 144.03                   | C               | --                          | 141.95                   |
| 5'                          |                 | --                            | 131.94                   | C               | --                          | 136.85                   |
| 5                           |                 | --                            | 106.83                   | C               | --                          | 107.06                   |



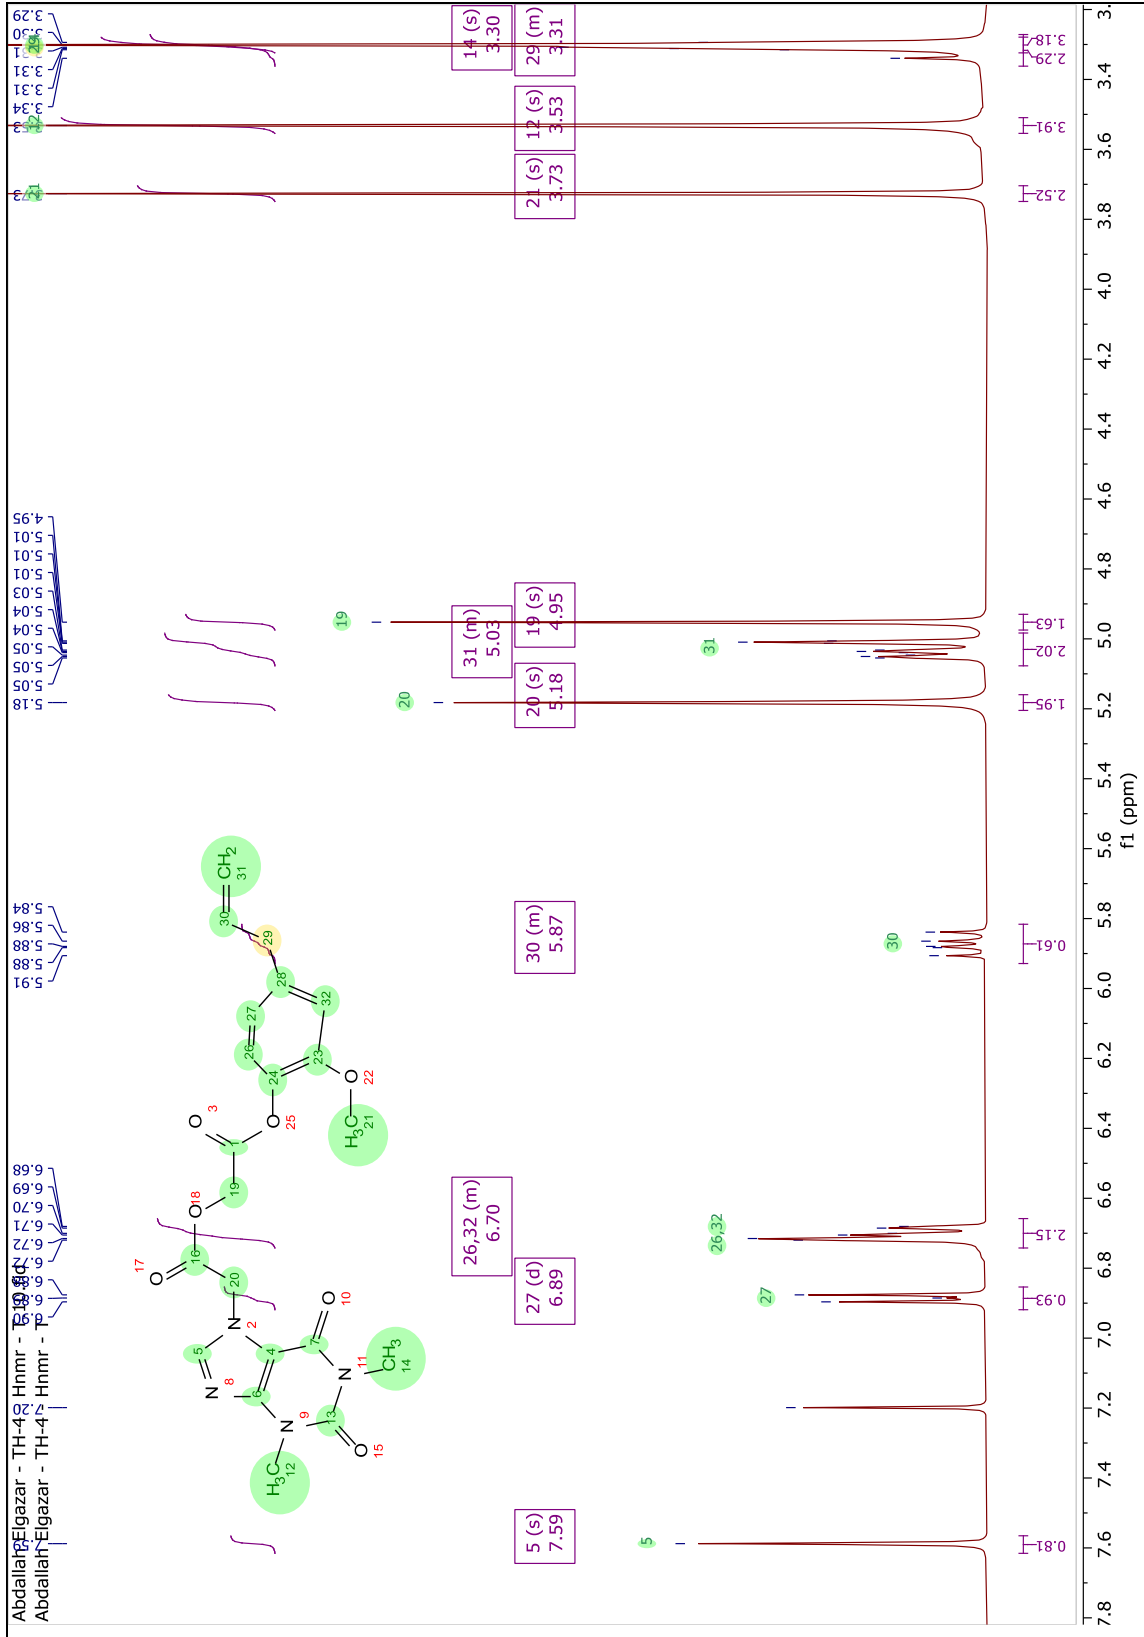

**<sup>1</sup>H NMR spectrum of compound 6d**

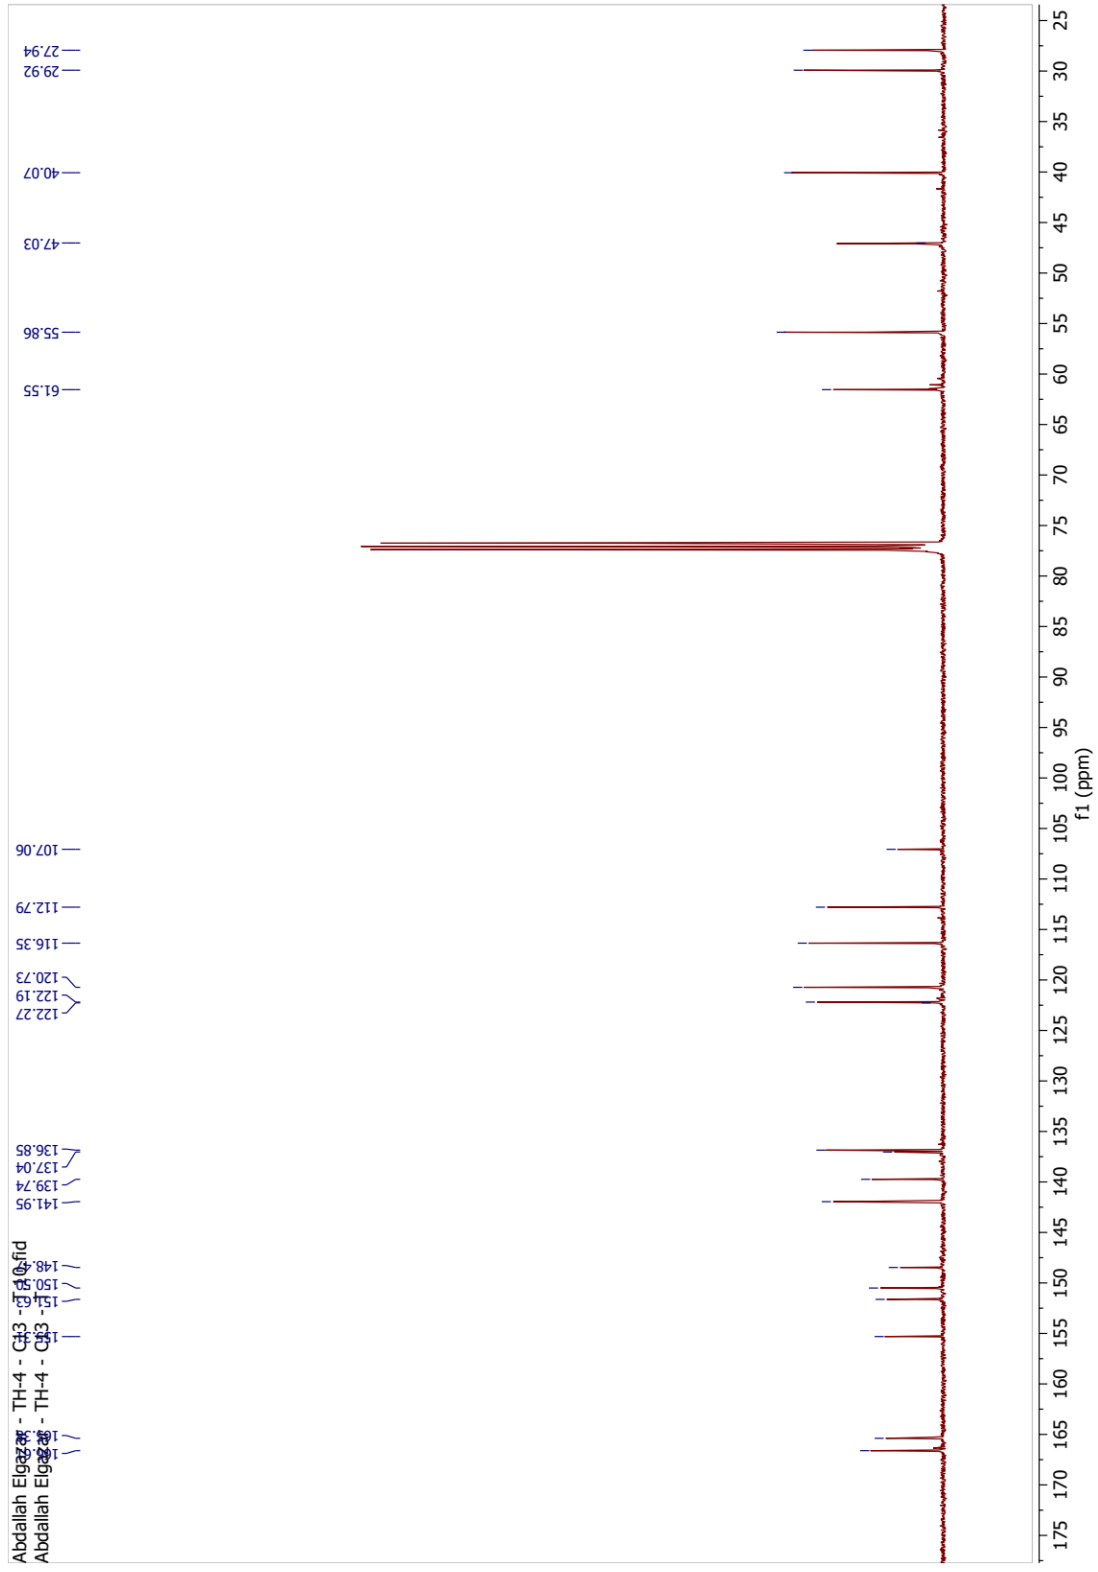

**<sup>13</sup>C NMR spectrum of compound 6d**

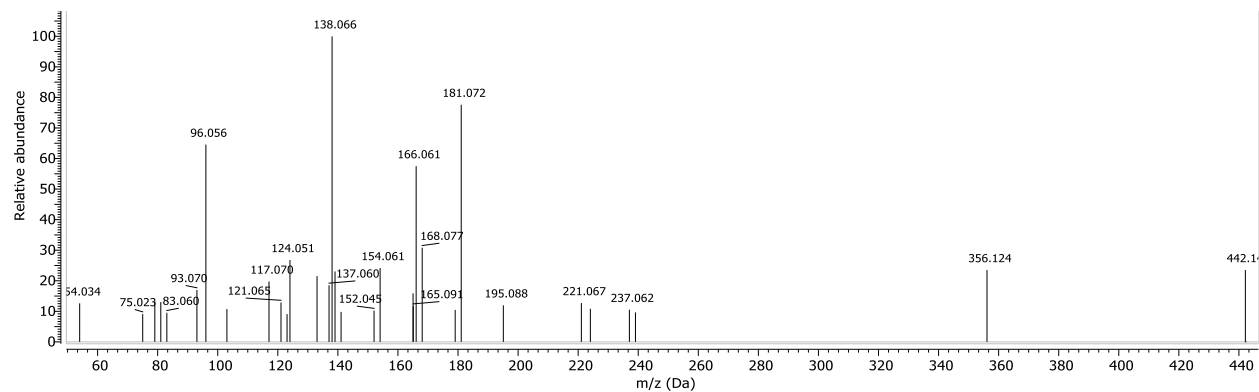

Mass spectrum of compound 6d

Table.s9 NMR assignment of acefylline-oxadiazole-menthol hybrid 9a

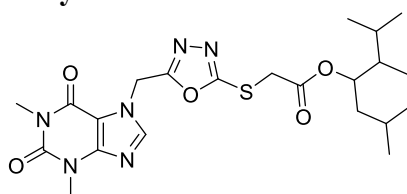

| Parent compound |      |                               |                          | Hybrid compound |                                              |                          |
|-----------------|------|-------------------------------|--------------------------|-----------------|----------------------------------------------|--------------------------|
| C/H             | Atom | <sup>1</sup> H(δ, (J,Hz) ppm) | <sup>13</sup> C (δ, ppm) | DEPT            | <sup>1</sup> H(δ,ppm)(J,Hz)                  | <sup>13</sup> C (δ, ppm) |
| 7'              |      | 1.35                          | --                       | --              | --                                           | --                       |
| 14'             |      | 0.8                           | 16                       | CH3             | 0.66 (d, <i>J</i> = 6.9 Hz, 3H)              | 16.21                    |
| 11'             |      | 0.92                          | 21                       | CH3             | 0.82 (dd, <i>J</i> = 9.0, 6.7 Hz, 3H)        | 20.73                    |
| 12'             |      | 0.91                          | 22.2                     | CH3             | 0.82 (dd, <i>J</i> = 9.0, 6.7 Hz, 3H)        | 21.97                    |
| 5'              |      | 1.61                          | 23.1                     | CH              | 1.66 – 1.56 (m, 1H)                          | 23.30                    |
| 9'              |      | 0.97                          | 23.1                     | CH              | 1.04 – 0.90 (m, 1H)                          | 23.30                    |
| 2'              |      | 2.17                          | 25.8                     | CH              | 1.97 – 1.87 (m, 1H)                          | 26.18                    |
| 7               |      | 3.20                          | 27.9                     | CH3             | 3.33 (s, 3H)                                 | 28.04                    |
| 6               |      | 3.44                          | 29.92                    | CH3             | 3.54 (s, 3H)                                 | 29.92                    |
| 6'              |      | 1.43                          | 31.6                     | CH              | 1.66 – 1.56 (m, 1H)                          | 31.39                    |
| 4'              |      | 1.66                          | 34.5                     | CH              | 1.77 (ddd, <i>J</i> = 11.3, 8.4, 5.7 Hz, 1H) | 34.05                    |
| 13'             |      | 0.84                          | 34.52                    | CH              | 0.82 (dd, <i>J</i> = 9.0, 6.7 Hz, 1H)        | 34.05                    |
| CH2LINKER       |      | 4.9                           | 38                       | CH2             | 3.97 (s, 2H)                                 | 34.64                    |
| 3'              |      | 1.9                           | 45                       | CH              | 1.77 (ddd, <i>J</i> = 11.3, 8.4, 5.7 Hz, 1H) | 40.38                    |
| 10'             |      | 0.95                          | 45                       | CH              | 1.04 – 0.90 (m, 1H)                          | 40.38                    |
| CH2CO           |      | 5.07                          | 43                       | CH2             | 5.73 (s, 2H)                                 | 40.58                    |
| 8'              |      | 1.1                           | 50.12                    | CH              | 1.38 – 1.21 (m, 1H)                          | 46.89                    |
| 1'              |      | 3.4 td, ( <i>j</i> =10.4,4.3) | 71.5                     | CH              | 4.67 (td, <i>J</i> = 10.9, 4.4 Hz, 1H)       | 76.93                    |
| 5               |      | --                            | 106.83                   | C               | --                                           | 106.70                   |
| 4               |      | 8.04                          | 143.63                   | CH              | 7.68 (s, 1H)                                 | 141.35                   |
| 3               |      | --                            | 148.36                   | C               | --                                           | 148.66                   |
| 2               |      | --                            | 151.13                   | C               | --                                           | 151.56                   |
| 1               |      | -                             | 154.3                    | C               | --                                           | 155.19                   |
| S-C=N           |      | --                            | 164                      | C               | --                                           | 162.15                   |
| C=O-Linker      |      | --                            | 165.6                    | C               | --                                           | 165.19                   |
| CH2-C=N         |      | --                            | 163                      | C               | ---                                          | 166.68                   |

Abdallah Elgazar - TO-3 - Hnmr 2010.fid  
Abdallah Elgazar - TO-3 - Hnmr 2010

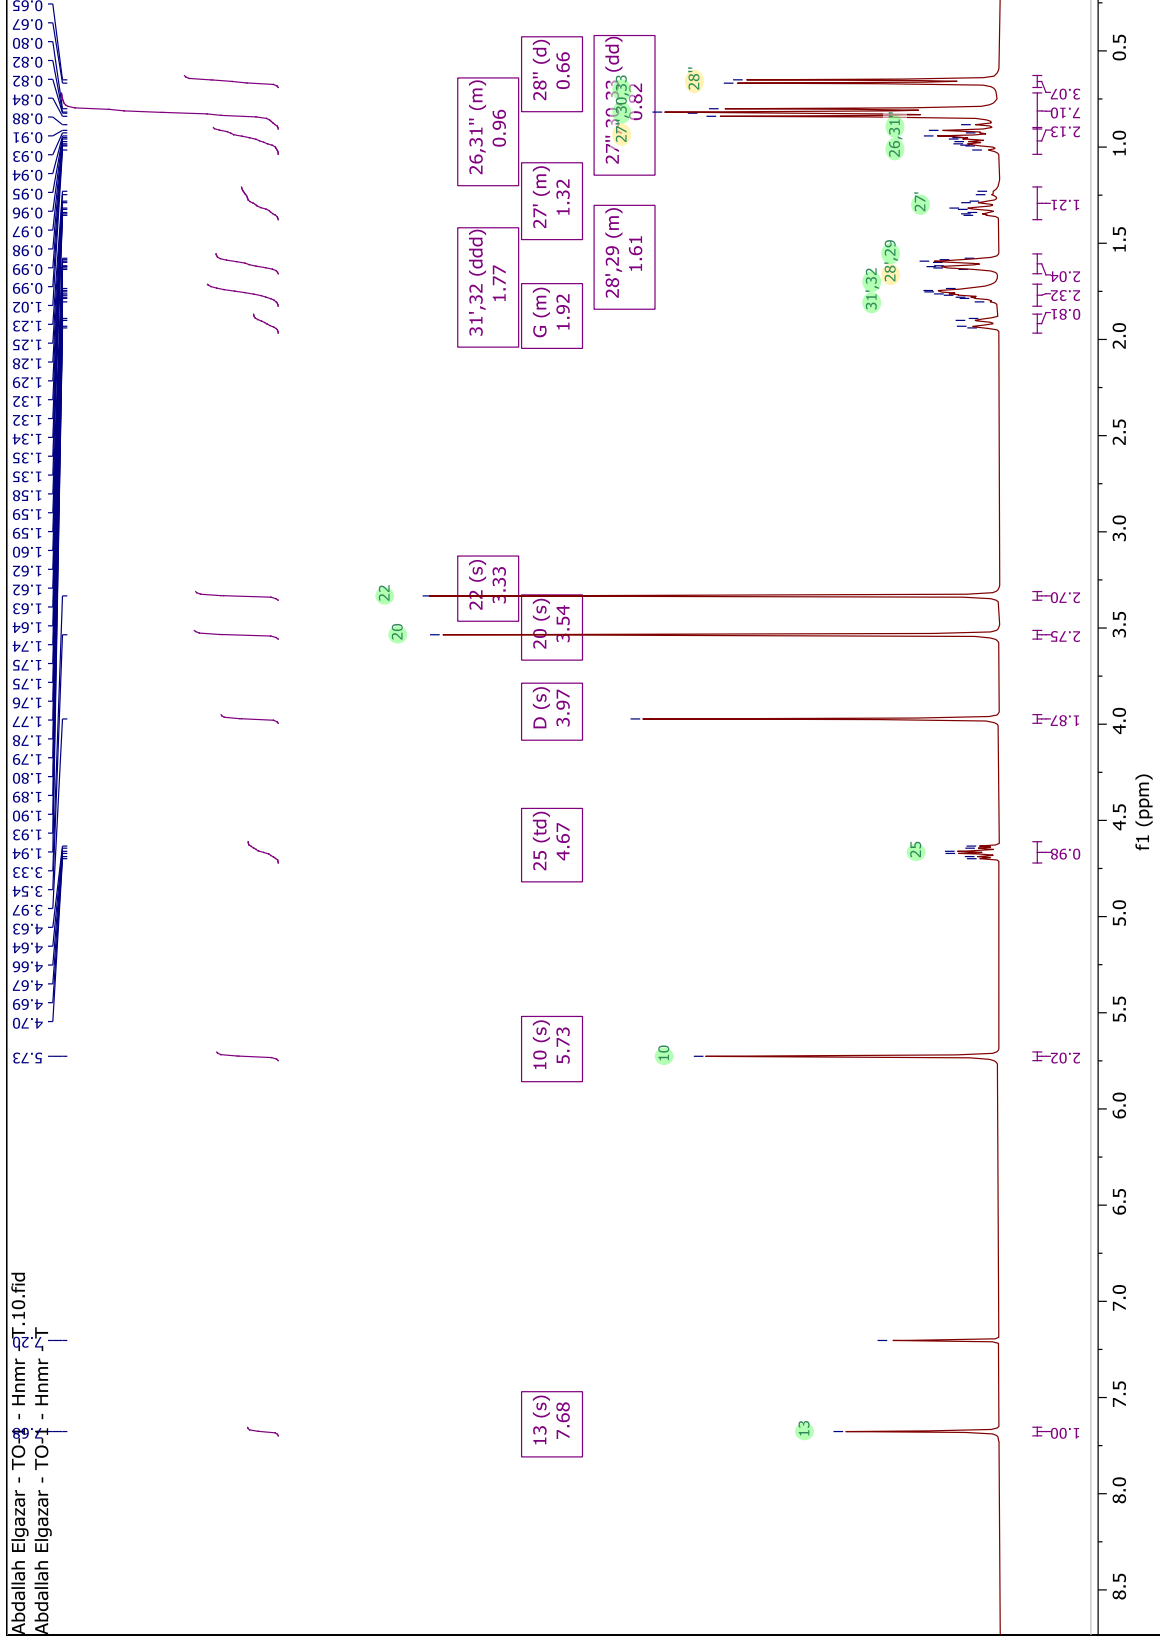

<sup>1</sup>H NMR spectrum of compound 9a

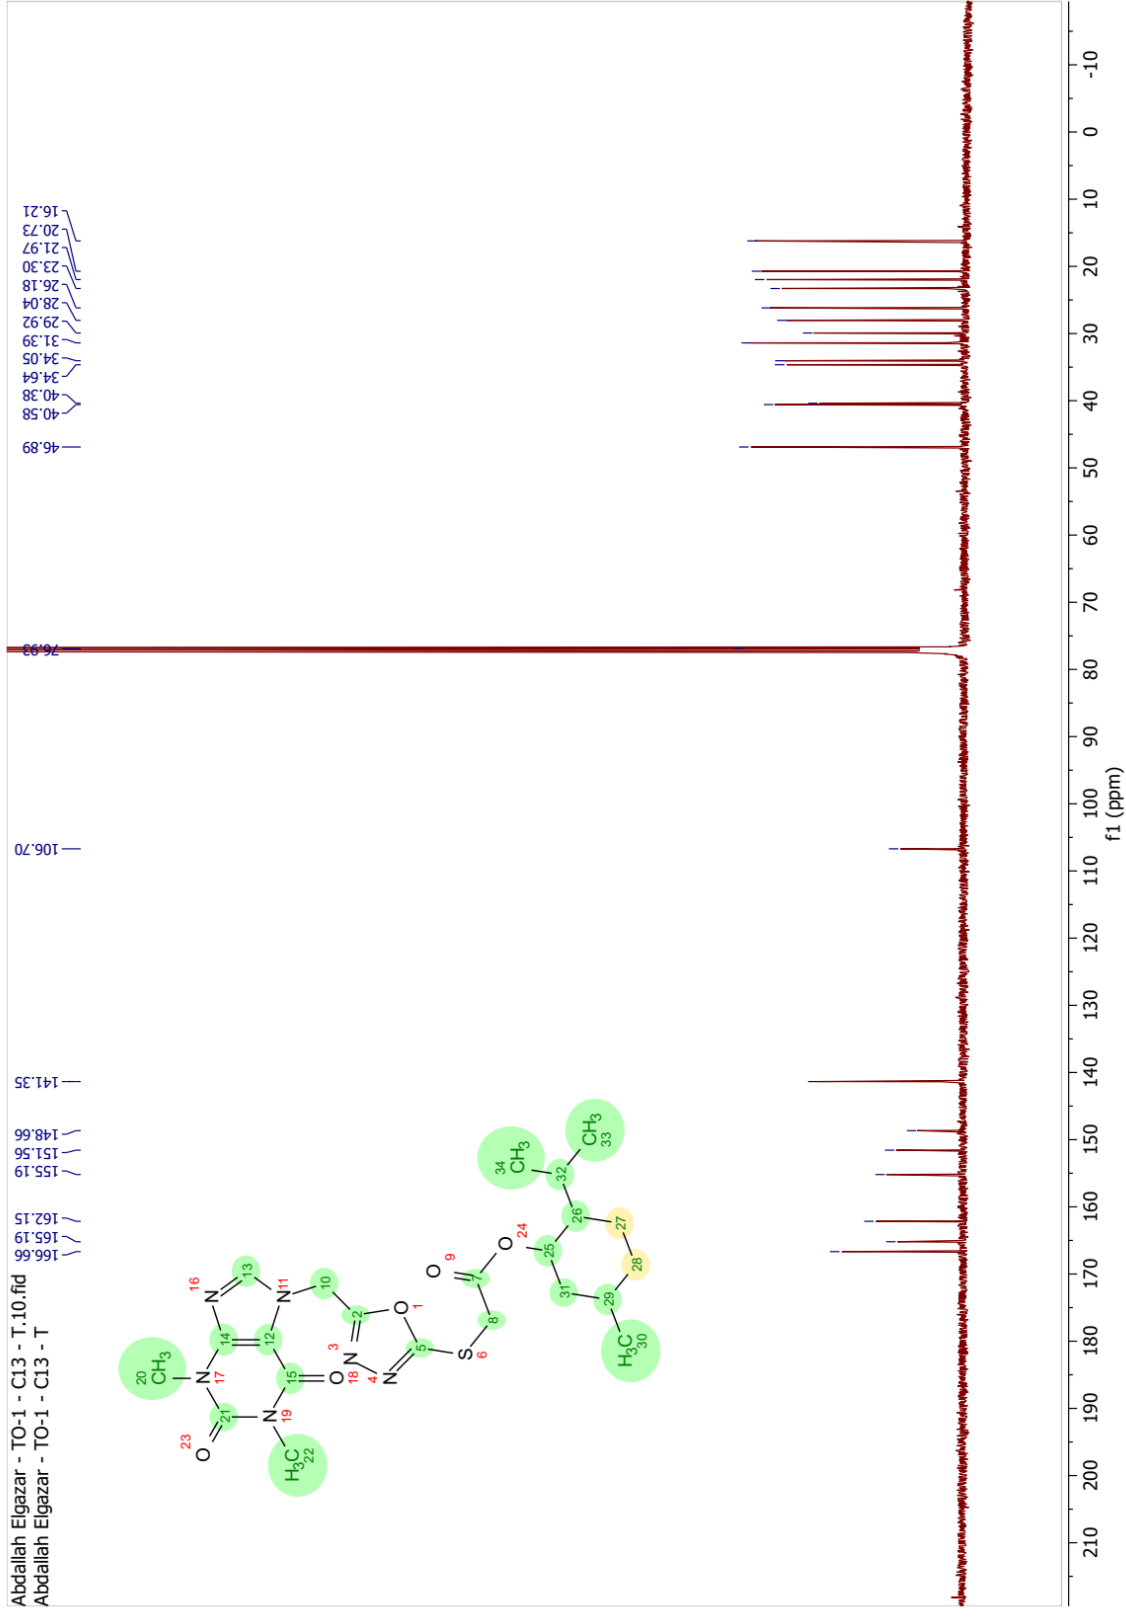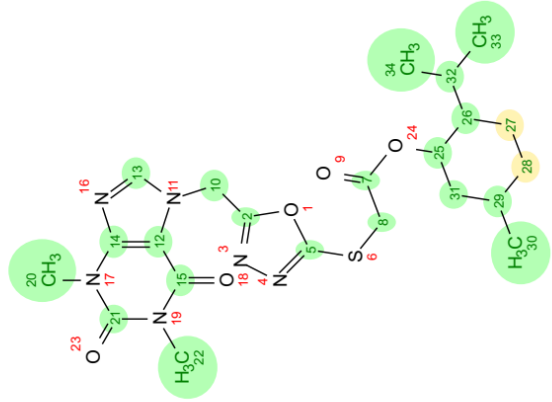

**<sup>13</sup>C NMR spectrum of compound 9a**

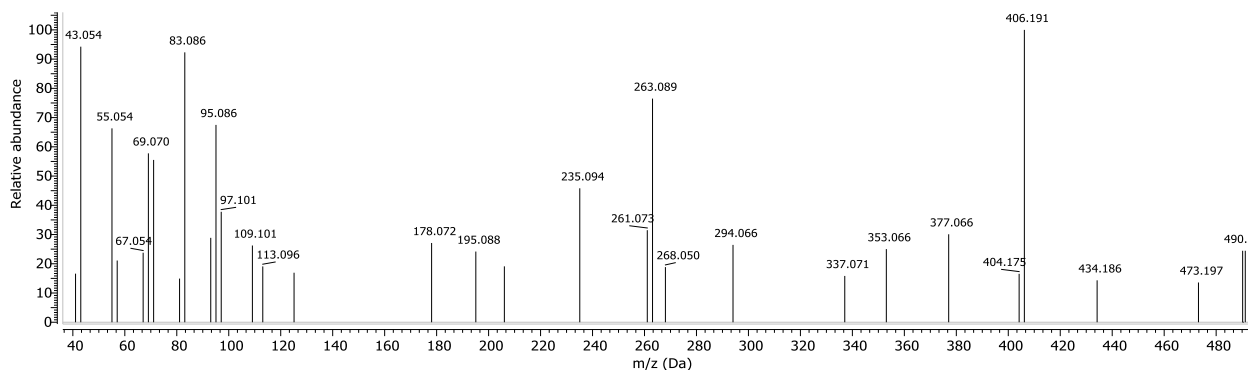

Mass spectrum of compound 9a

Table.s10 NMR assignment of acefylline-oxadiazole-thymol hybrid 9b

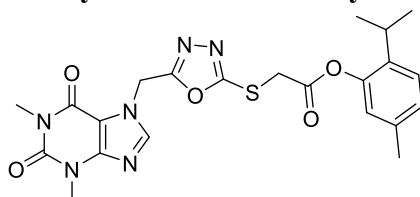

| Parent compound |                |                                  |                             | Hybrid compound |                             |                             |
|-----------------|----------------|----------------------------------|-----------------------------|-----------------|-----------------------------|-----------------------------|
| C/H             | Atom           | <sup>1</sup> H(δ, ppm)<br>(J,Hz) | <sup>13</sup> C<br>(δ, ppm) | DEPT            | <sup>1</sup> H(δ,ppm)(J,Hz) | <sup>13</sup> C<br>(δ, ppm) |
|                 | C=N            | --                               | 164                         | C               | --                          | 166.10                      |
|                 | CO-LINKER      | --                               | 165.6                       | C               | --                          | 164.89                      |
|                 | C=N-S          | --                               | 163                         | C               | --                          | 162.40                      |
|                 | 1              | -                                | 154.3                       | C               | --                          | 155.18                      |
|                 | 2              | --                               | 151.13                      | C               | --                          | 151.54                      |
|                 | 1 <sup>1</sup> | -                                | 150.2                       | C               | --                          | 148.61                      |
|                 | 3              | --                               | 148.36                      | C               | --                          | 147.58                      |
|                 | 4              | 8.04                             | 143.63                      | CH              | 7.68 (s, 1H)                | 141.33                      |
|                 | 3'             | -                                | 138.4                       | C               | --                          | 136.84                      |
|                 | 6'             | --                               | 131.7                       | C               | --                          | 136.82                      |
|                 | 4'             | 7.08                             | 126.3                       | CH              | 7.12 (d, J= 7.9 Hz, 1H)     | 127.73                      |
|                 | 5'             | 7.08                             | 126.3                       | CH              | 7.01 – 6.94 (m, 1H)         | 126.60                      |
|                 | 2'             | 5.4                              | 116.9                       | CH              | 6.78 – 6.73 (m, 1H)         | 122.23                      |
|                 | 5              | --                               | 106.83                      | C               | --                          | 106.69                      |
|                 | CH2-LINKER     | 4.9                              | 43                          | CH2             | 4.24 (s, 2H)                | 40.43                       |
|                 | CH2CO          | 5.07                             | 38                          | CH2             | 5.73 (s, 2H)                | 34.26                       |
|                 | 6              | 3.44                             | 29.92                       | CH3             | 3.53 (s, 3H)                | 29.95                       |
|                 | 7              | 3.20                             | 27.9                        | CH3             | 3.33 (s, 3H)                | 28.04                       |
|                 | 8'             | 1.05                             | 26.1                        | CH3             | 1.08 (d, J= 6.9 Hz, 3H)     | 26.98                       |
|                 | 9'             | 1.05                             | 26.1                        | CH3             | 1.08 (d, J= 6.9 Hz, 3H)     | 26.98                       |
|                 | 7'             | 3.38                             | 25.5                        | CH              | 2.89 (p, J= 6.9 Hz, 1H)     | 23.05                       |
|                 | 10'            | 2.2                              | 18.7                        | CH3             | 2.23 (s, 3H)                | 20.83                       |



Abdallah Elgazar - TO-2 - C13 - T.10.fid  
Abdallah Elgazar - TO-2 - C13 - T

166.10  
164.89  
162.40  
155.18  
151.54  
148.61  
147.58  
141.33  
136.84  
136.82  
127.73  
126.60  
122.23  
106.69  
40.43  
34.26  
29.95  
28.04  
26.98  
23.05  
20.83

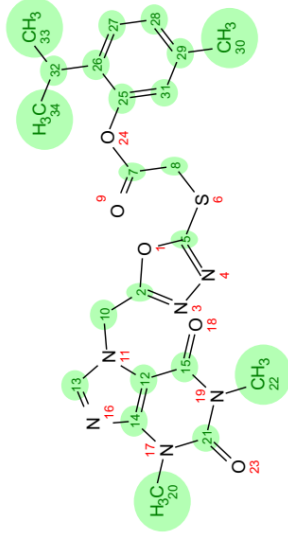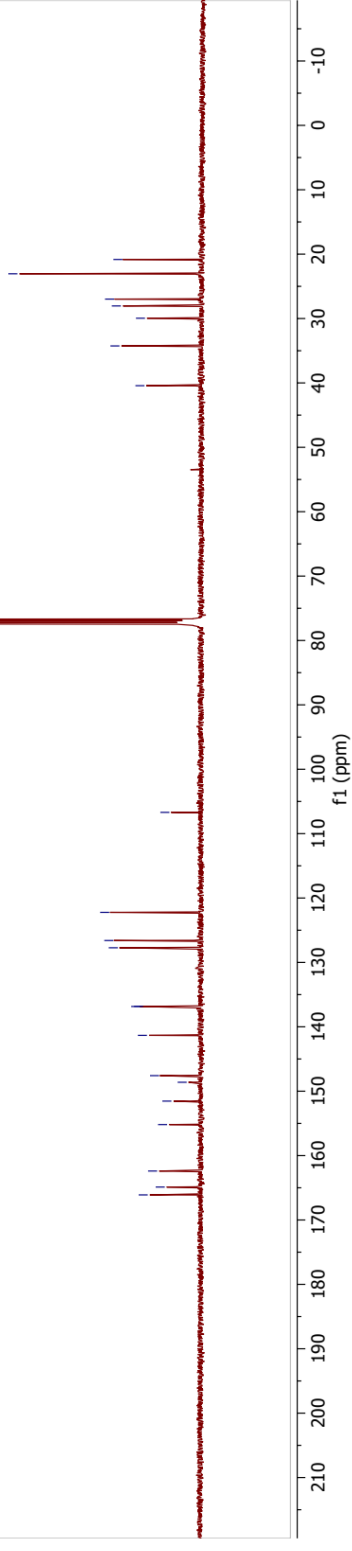

**<sup>13</sup>C NMR spectrum of compound 9b**



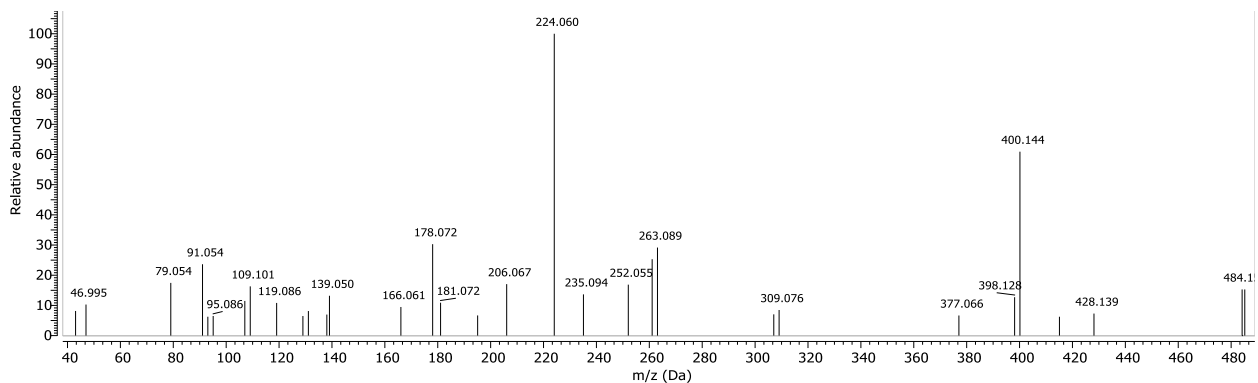

**Mass spectrum of compound 9b**

**Table.s11 NMR assignment of acefylline-oxadiazole-vanillin hybrid 9c**

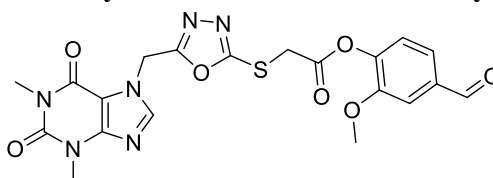

| Parent compound           |      |                               |                          | Hybrid compound |                             |                          |
|---------------------------|------|-------------------------------|--------------------------|-----------------|-----------------------------|--------------------------|
| C/H                       | Atom | <sup>1</sup> H(δ, (J,Hz) ppm) | <sup>13</sup> C (δ, ppm) | DEPT            | <sup>1</sup> H(δ,ppm)(J,Hz) | <sup>13</sup> C (δ, ppm) |
| HC=O                      |      | 10.11                         | 191.2                    | CH              | 9.87 (s, 1H)                | 190.97                   |
| CO-LINKER                 |      | --                            | 165.6                    | C               | --                          | 164.99                   |
| C=N                       |      | --                            | 164                      | C               | --                          | 164.62                   |
| C=N-S                     |      | --                            | 163                      | C               | --                          | 162.53                   |
| 1                         |      | -                             | 154.3                    | C               | -                           | 155.17                   |
| 4'                        |      | -                             | 152.18                   | C               | --                          | 151.60                   |
| 2                         |      | --                            | 151.13                   | C               | --                          | 151.51                   |
| 3                         |      | --                            | 148.36                   | C               | --                          | 148.69                   |
| 3'                        |      | --                            | 147.5                    | C               | --                          | 144.26                   |
| 4                         |      | 8.04                          | 143.63                   | CH              | 7.69 (s, 1H)                | 141.44                   |
| 1 <sup>1</sup>            |      | --                            | 129.77                   | C               | --                          | 135.60                   |
| 6'                        |      | 6.9d(J=7.5)                   | 127.49                   | CH              | 7.23 – 7.15 (m, 1H)         | 124.68                   |
| 2'                        |      | 7.3 d(J=1.50)                 | 109.14                   | CH              | 7.40 (d, J= 6.9 Hz, 1H)     | 110.89                   |
| 5'                        |      | 7.2                           | 114.75                   | CH              | 7.40 (d, J= 6.9 Hz, 1H)     | 123.15                   |
| 5                         |      | --                            | 106.83                   | C               | --                          | 106.68                   |
| OCH <sub>3</sub> vanillin |      | 3.84                          | 56.2                     | CH <sub>3</sub> | 3.79 (s, 3H)                | 56.18                    |
| CH <sub>2</sub> CO        |      | 5.07                          | 43                       | CH <sub>2</sub> | 5.73 (s, 2H)                | 40.41                    |
| CH <sub>2</sub> LINKER    |      | 4.9                           | 38                       | CH <sub>2</sub> | 4.25 (s, 2H)                | 33.88                    |
| 6                         |      | 3.44                          | 29.92                    | CH <sub>3</sub> | 3.50 (s, 3H)                | 29.89                    |
| 7                         |      | 3.20                          | 27.9                     | CH <sub>3</sub> | 3.31 (s, 3H)                | 28.02                    |

Abdallah Elgazar - TO-3 - Hnmr - T.10.fid  
Abdallah Elgazar - TO-3 - Hnmr - T

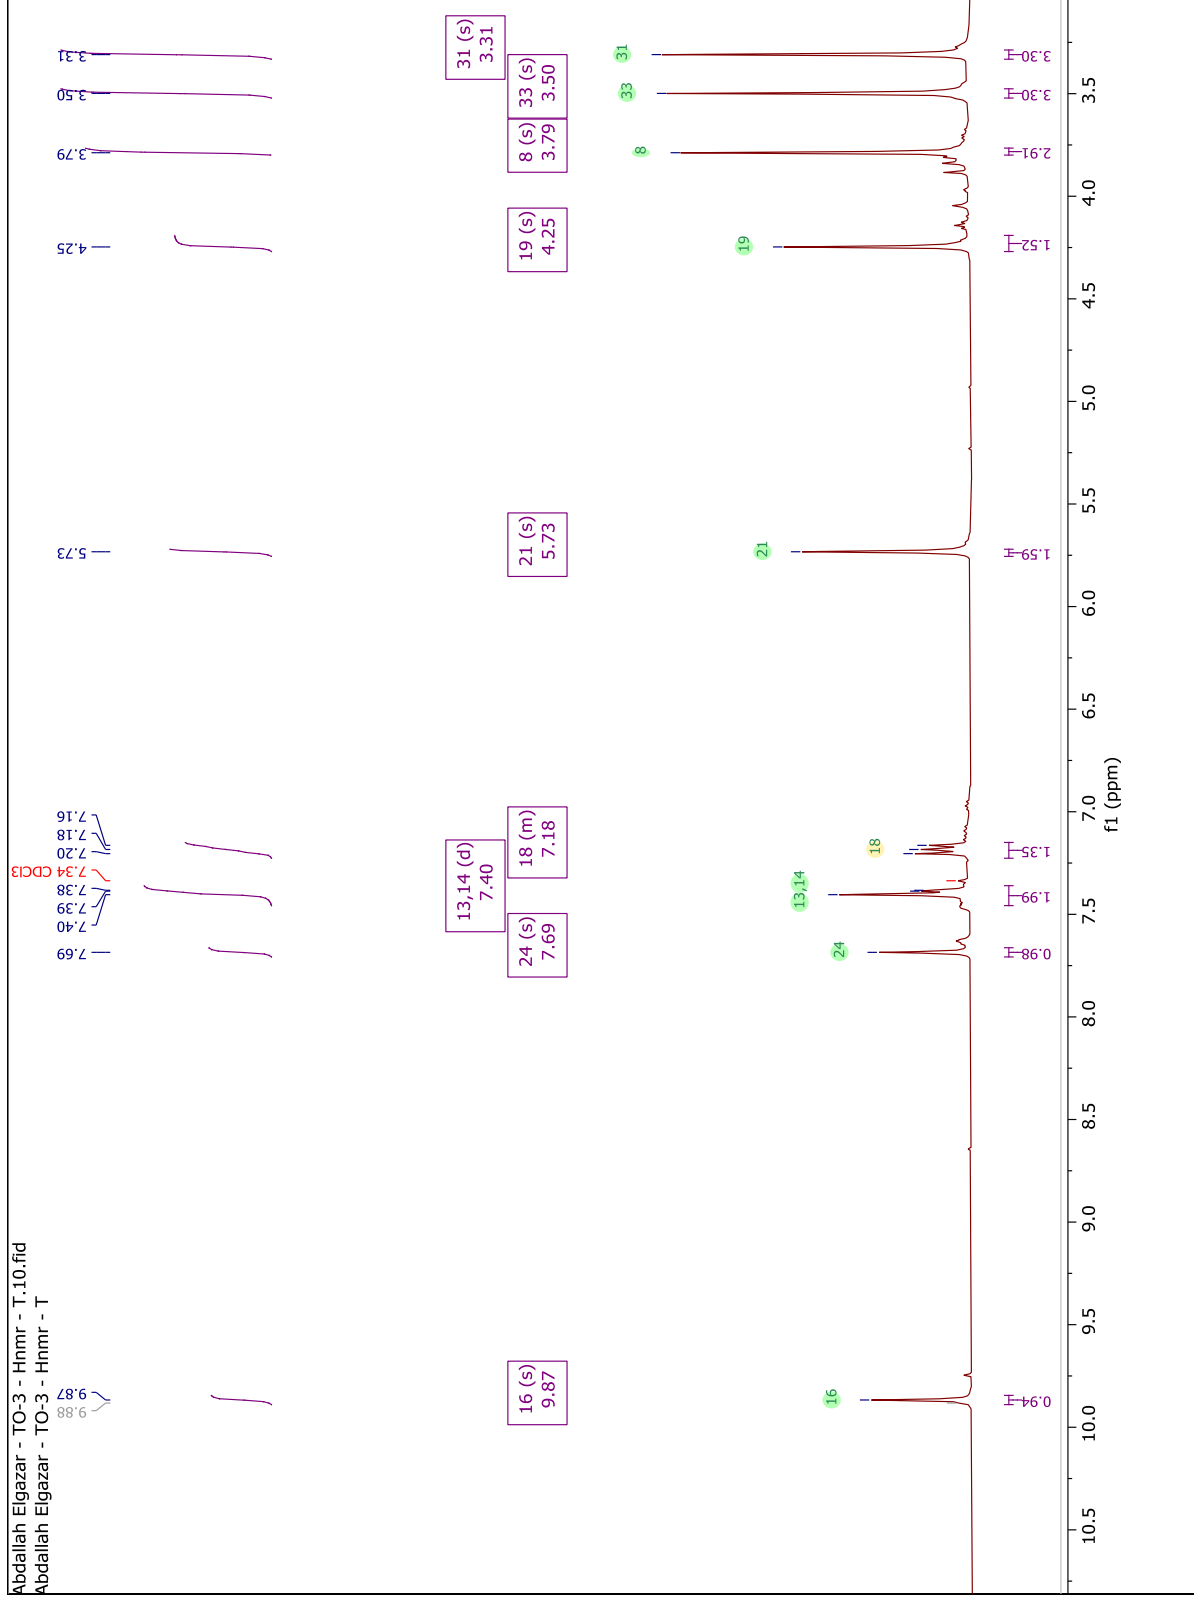

<sup>1</sup>H NMR spectrum of compound 9c

ibdallah Elgazar - TO3 - C13 - T.10.fid  
ibdallah Elgazar - TO3 - C13 - T

188.02  
164.99  
162.53  
155.17  
151.60  
151.51  
148.69  
144.26  
141.44  
135.60  
124.68  
123.15  
110.89  
106.68  
56.18  
40.41  
33.88  
29.89  
28.02

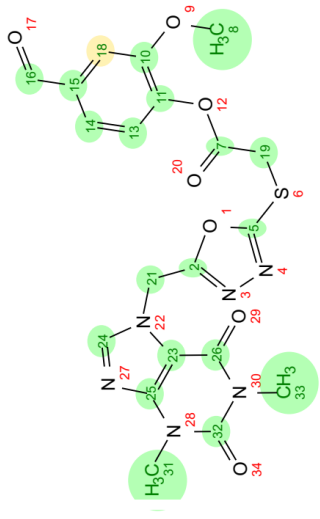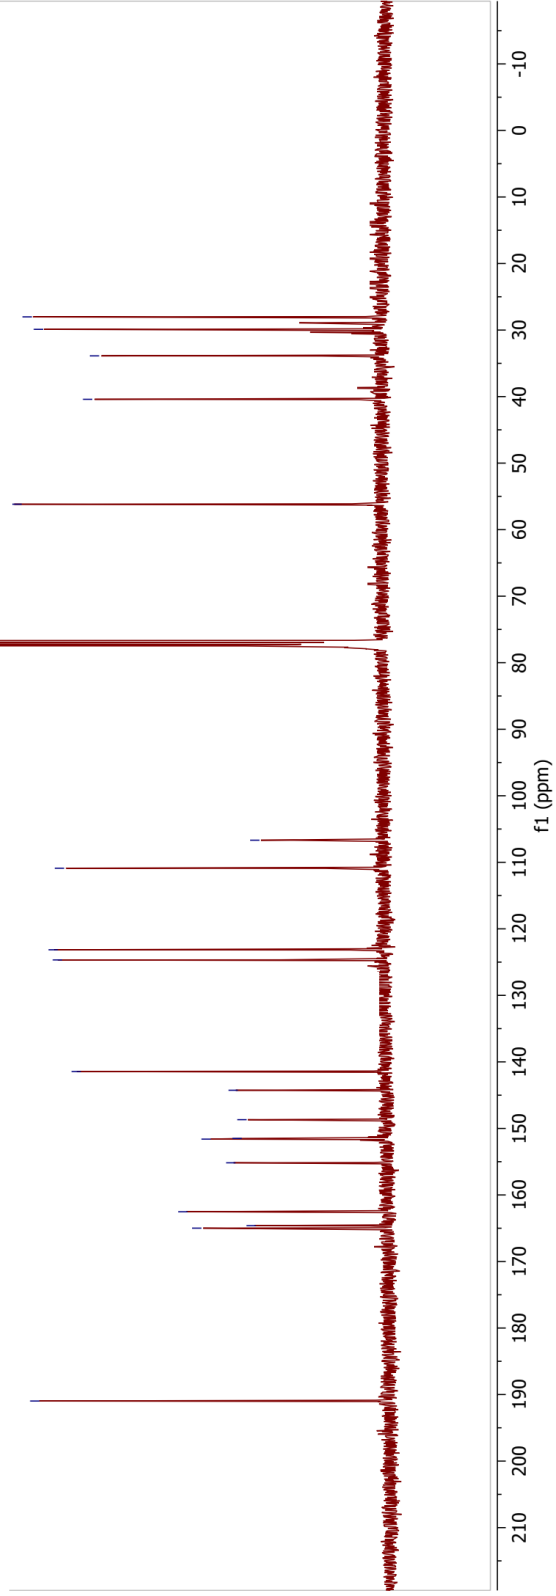

<sup>13</sup>C NMR spectrum of compound 9c

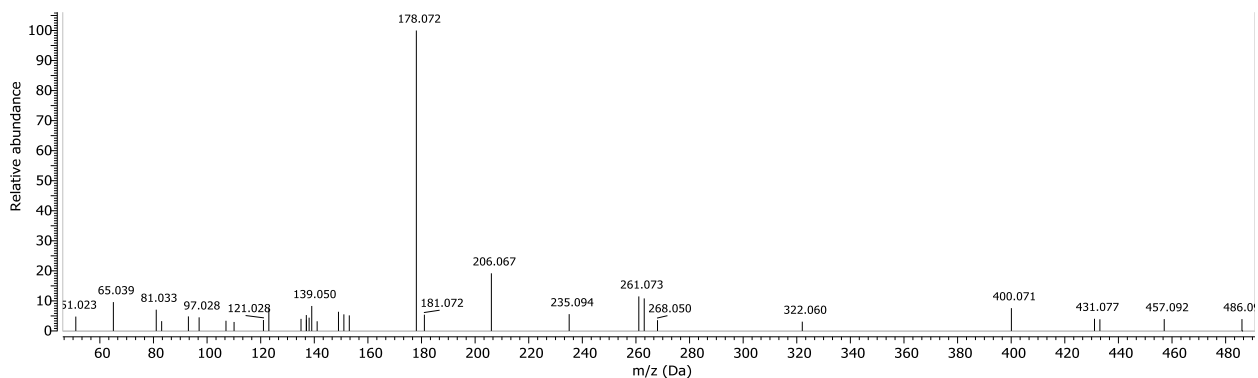

**Mass spectrum of compound 9c**

**Table.s12 NMR assignment of ACEFYLLINE-oxadiazole-eugenol hybrid 9d**

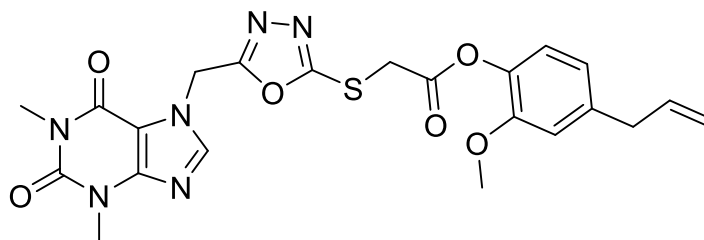

| Parent compound |            |                              |                         | Hybrid compound |                                 |                         |
|-----------------|------------|------------------------------|-------------------------|-----------------|---------------------------------|-------------------------|
| C/H             | Atom       | <sup>1</sup> H(δ, ppm)(J,Hz) | <sup>13</sup> C(δ, ppm) | DEPT            | <sup>1</sup> H(δ,ppm)(J,Hz)     | <sup>13</sup> C(δ, ppm) |
| CO-LINKER       | --         | --                           | 165.6                   | C               | --                              | 165.66                  |
| C=N             | --         | --                           | 164                     | C               | --                              | 164.81                  |
| C=N-S           | --         | --                           | 163                     | C               | --                              | 162.35                  |
| 1               | -          | --                           | 154.3                   | C               | --                              | 155.18                  |
| 2               | --         | --                           | 151.13                  | C               | --                              | 151.53                  |
| 3               | --         | --                           | 148.36                  | C               | --                              | 150.46                  |
| 1 <sup>1</sup>  | --         | --                           | 146.6                   | C               | --                              | 148.68                  |
| 2'              | --         | --                           | 144.03                  | C               | --                              | 141.40                  |
| 4               | 8.04       | --                           | 143.63                  | CH              | 7.68 (d, <i>J</i> = 1.9 Hz, 1H) | 139.68                  |
| -CH=eugenol     | 5.9        | --                           | 137.9                   | CH              | 5.94 – 5.79 (m, 1H)             | 137.54                  |
| 5'              | --         | --                           | 131.94                  | C               | --                              | 136.84                  |
| 4'              | 6.67       | --                           | 121.2                   | CH              | 6.68 (t, <i>J</i> = 4.6 Hz, 1H) | 122.11                  |
| 3'              | 6.82       | --                           | 115.49                  | CH              | 6.91 – 6.84 (m, 1H)             | 120.69                  |
| 6'              | 6.66       | --                           | 114.46                  | CH              | 6.68 (t, <i>J</i> = 4.6 Hz, 1H) | 116.36                  |
| EugenolCH=CH2   | 5.06, 5.04 | --                           | 111.8                   | CH2             | 5.07 – 4.98 (m, 2H)             | 112.74                  |
| 5               | --         | --                           | 106.83                  | C               | --                              | 106.69                  |
| OCH3Eugenol     | 3.8        | --                           | 55.8                    | CH3             | 3.69 (s, 3H)                    | 55.85                   |
| CH2CO           | 5.07       | --                           | 43                      | CH2             | 5.73 (d, <i>J</i> = 2.1 Hz, 2H) | 40.38                   |
| CH2-CH=eugenol  | 3.29       | --                           | 39.9                    | CH2             | 3.35 – 3.27 (m, 2H)             | 40.07                   |
| CH2-LINKER      | 4.9        | --                           | 38                      | CH2             | 4.26 – 4.19 (m, 2H)             | 34.00                   |
| 6               | 3.44       | --                           | 29.92                   | CH3             | 3.58 – 3.47 (m, 3H)             | 29.87                   |
| 7               | 3.20       | --                           | 27.9                    | CH3             | 3.35 – 3.27 (m, 3H)             | 28.02                   |

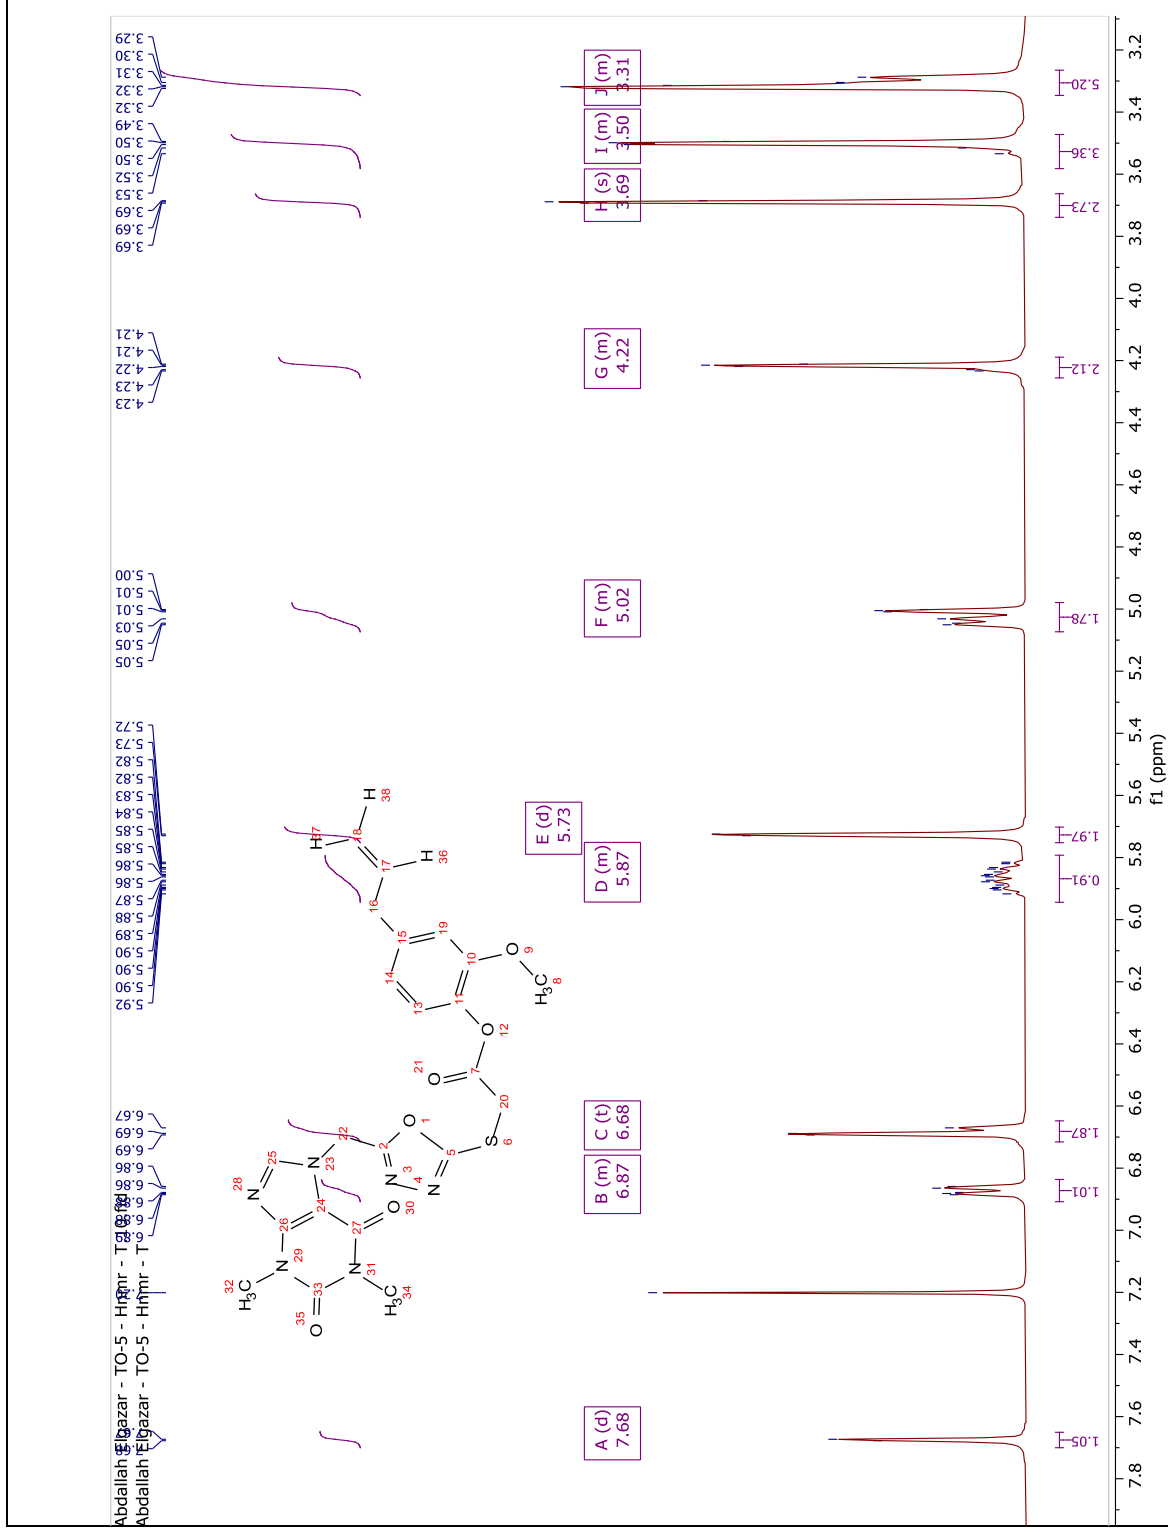

**<sup>1</sup>H NMR spectrum of compound 9d**

Abdallah Elgazar - TO-5 - C13 - T.10.fid  
Abdallah Elgazar - TO-5 - C13 - T

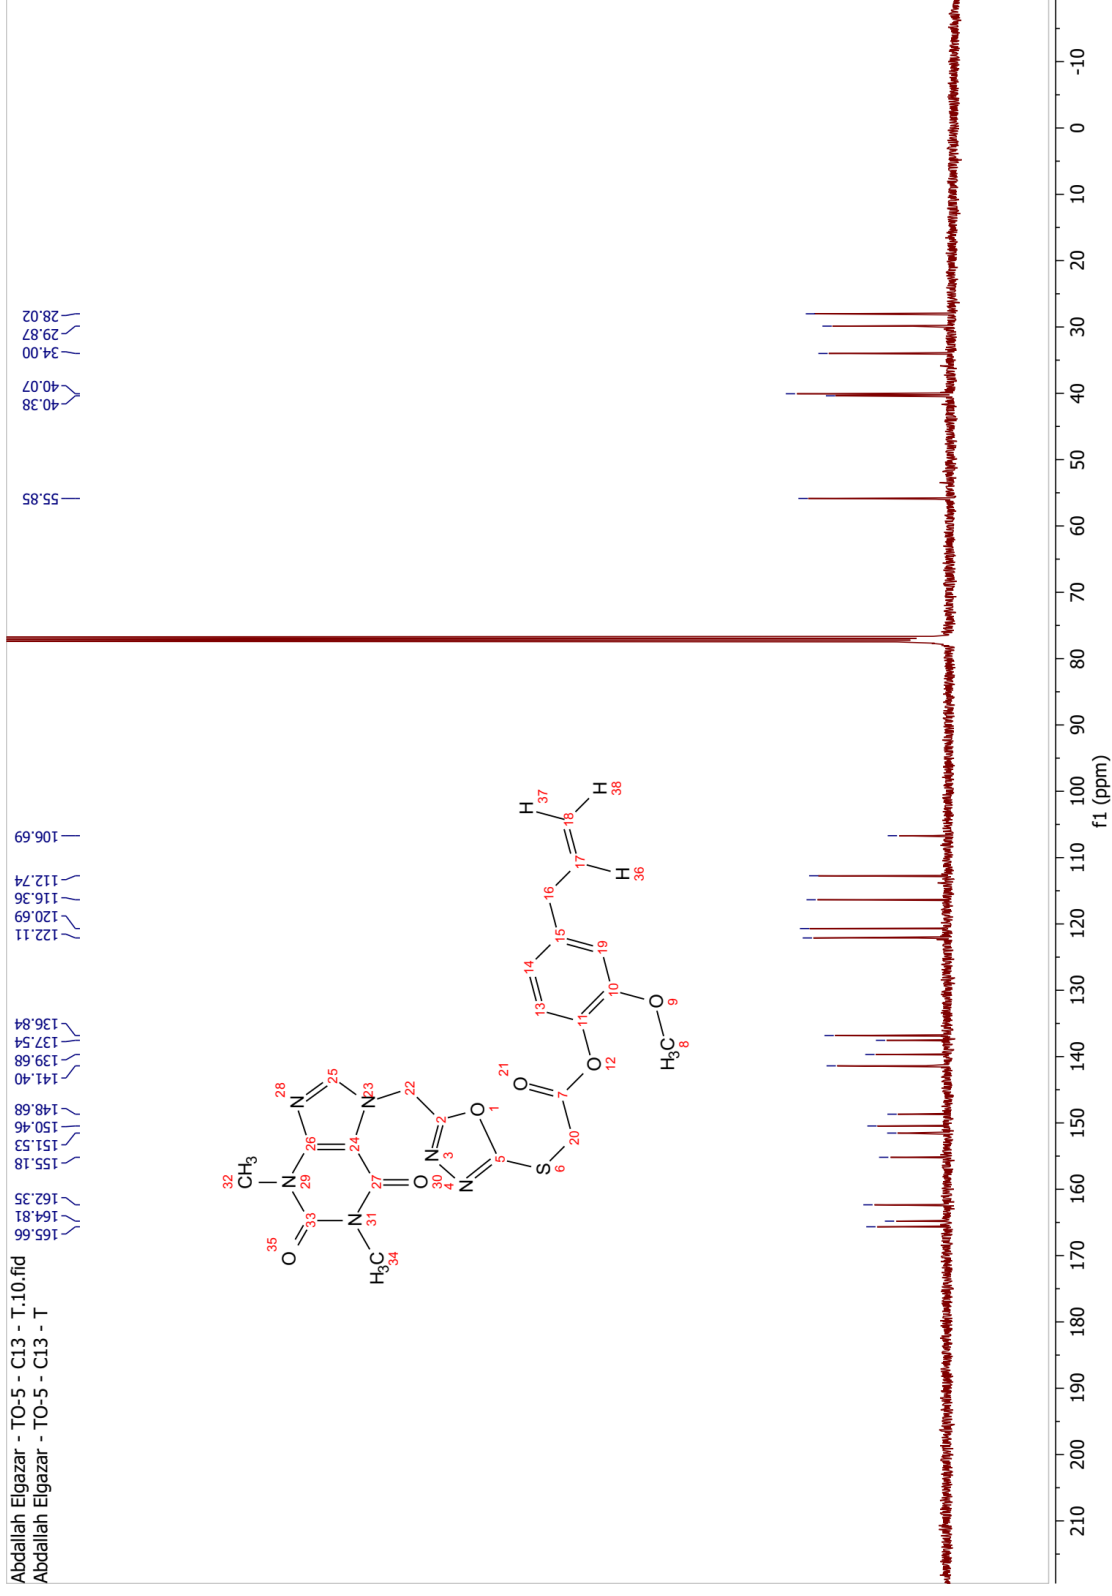

<sup>13</sup>C NMR spectrum of compound 9d

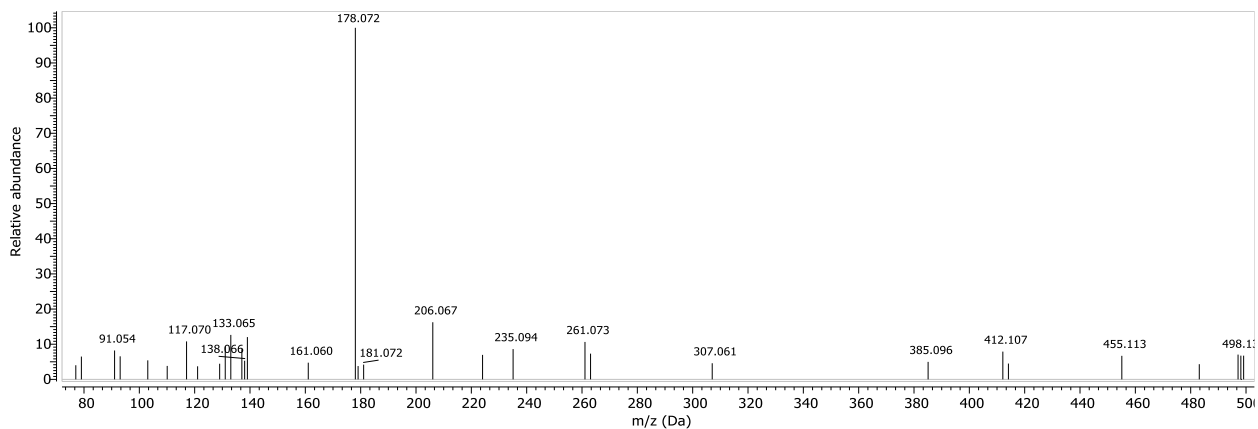

Mass spectrum of compound 9d

Table.s13 NMR assignment of acefylline-triazole-menthol hybrid 15a

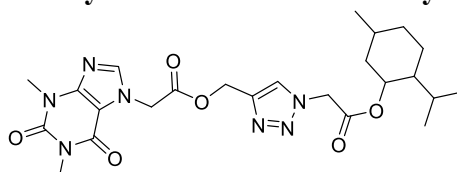

| Parent compound |      |                             |                          | Hybrid compound |                                 |                          |
|-----------------|------|-----------------------------|--------------------------|-----------------|---------------------------------|--------------------------|
| C/H             | Atom | <sup>1</sup> H(δ,ppm)(J,Hz) | <sup>13</sup> C (δ, ppm) | DEPT            | <sup>1</sup> H(δ,ppm)(J,Hz)     | <sup>13</sup> C (δ, ppm) |
| COO             |      | --                          | 169.48                   | C               | --                              | 167.02                   |
| C=O-Linker      |      | --                          | 165.6                    | C               | --                              | 165.65                   |
| 1               |      | -                           | 154.3                    | C               | --                              | 155.30                   |
| 2               |      | --                          | 151.13                   | C               | --                              | 151.62                   |
| 3               |      | --                          | 148.36                   | C               | --                              | 148.52                   |
| 4               |      | 8.04                        | 143.63                   | CH              | 7.57 (s, 1H)                    | 141.85                   |
| C=C TRIAZOLE    |      | --                          | 142                      | C               | --                              | 141.85                   |
| CH=C-TRIAZOLE   |      | 8                           | 122                      | CH              | 7.79 (s, 1H)                    | 125.75                   |
| 5               |      | --                          | 106.83                   | C               | --                              | 107.19                   |
| 1'              |      | 3.4,td,(j=10.4,4.3)         | 71.5                     | CH              | 4.72 (td, J = 10.9, 4.4 Hz, 1H) | 77.13                    |
| CH2-C=          |      | 5.23                        | 60                       | CH2             | 5.32 (s, 2H)                    | 59.11                    |
| 8'              |      | 1.1                         | 50.12                    | CH              | 1.37 – 1.29 (m, 1H)             | 51.10                    |
| CH2CO           |      | 5.07                        | 47.6                     | CH2             | 5.16 – 5.03 (m, 2H)             | 47.41                    |
| CH2-LINKER      |      | 4.9                         | 50                       | CH2             | 5.16 – 5.03 (m, 2H)             | 46.84                    |
| 3'              |      | 1.9                         | 45                       | CH              | 1.72 (pd, J = 6.9, 2.5 Hz, 1H)  | 40.65                    |
| 10'             |      | 0.95                        | 45                       | CH              | 1.06 – 0.89 (m, 1H)             | 40.65                    |
| 4'              |      | 1.66                        | 34.5                     | CH              | 1.67 – 1.57 (m, 1H)             | 33.96                    |
| 13'             |      | 0.84                        | 34.52                    | CH              | 0.84 (t, J = 7.0 Hz, 1H)        | 33.96                    |
| 6'              |      | 1.43                        | 31.6                     | CH              | 1.46 – 1.38 (m, 1H)             | 31.38                    |
| 6               |      | 3.44                        | 29.92                    | CH3             | 3.54 (s, 3H)                    | 29.92                    |
| 7               |      | 3.20                        | 27.9                     | CH3             | 3.31 (d, J = 1.1 Hz, 3H)        | 27.93                    |
| 2'              |      | 2.17                        | 25.8                     | CH              | 2.00 – 1.89 (m, 1H)             | 26.30                    |
| 5'              |      | 1.6                         | 23.1                     | CH              | 1.67 – 1.57 (m, 1H)             | 23.29                    |
| 9'              |      | 0.97                        | 23.1                     | CH              | 1.06 – 0.89 (m, 1H)             | 23.29                    |
| 12'             |      | 0.91                        | 22.2                     | CH3             | 0.84 (t, J = 7.0 Hz, 3H)        | 21.94                    |
| 11'             |      | 0.92                        | 21                       | CH3             | 0.84 (t, J = 7.0 Hz, 3H)        | 20.73                    |
| 14'             |      | 0.8                         | 16                       | CH3             | 0.68 (d, J = 6.9 Hz, 3H)        | 16.26                    |
| 7'              |      | 1.35                        | --                       | --              | --                              | --                       |

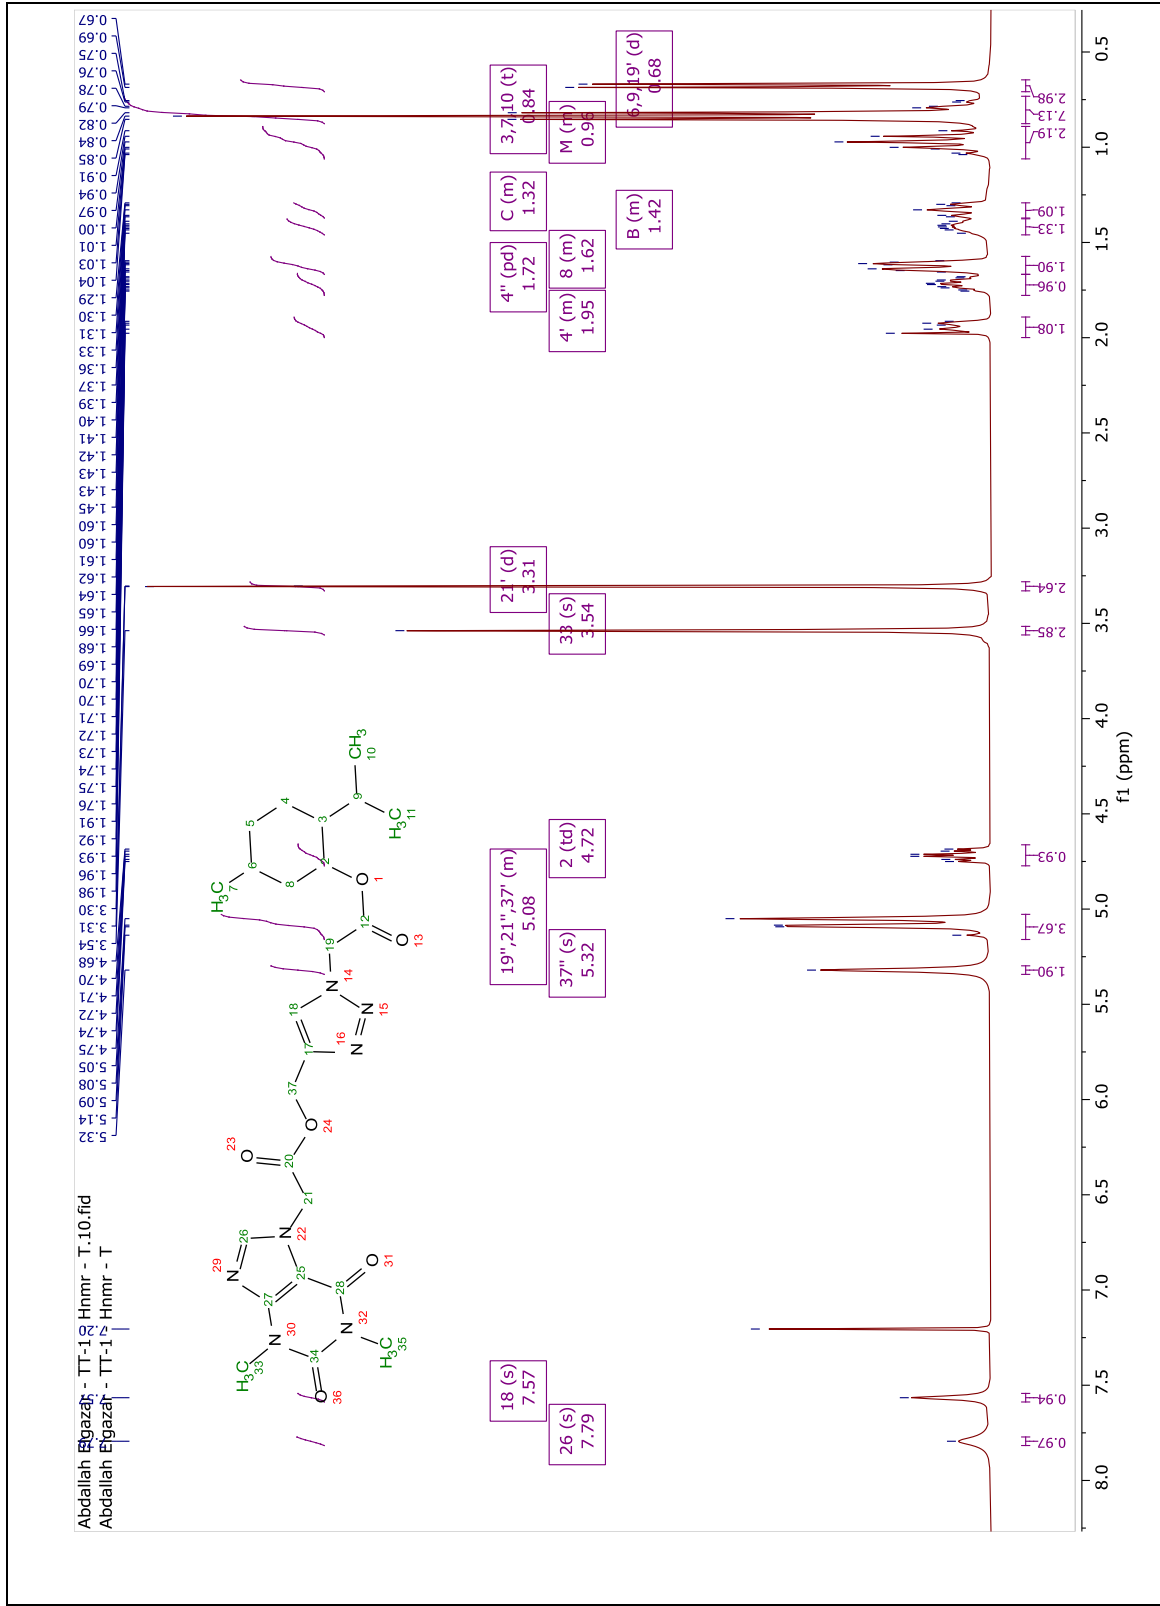

<sup>1</sup>H NMR spectrum of compound 15a



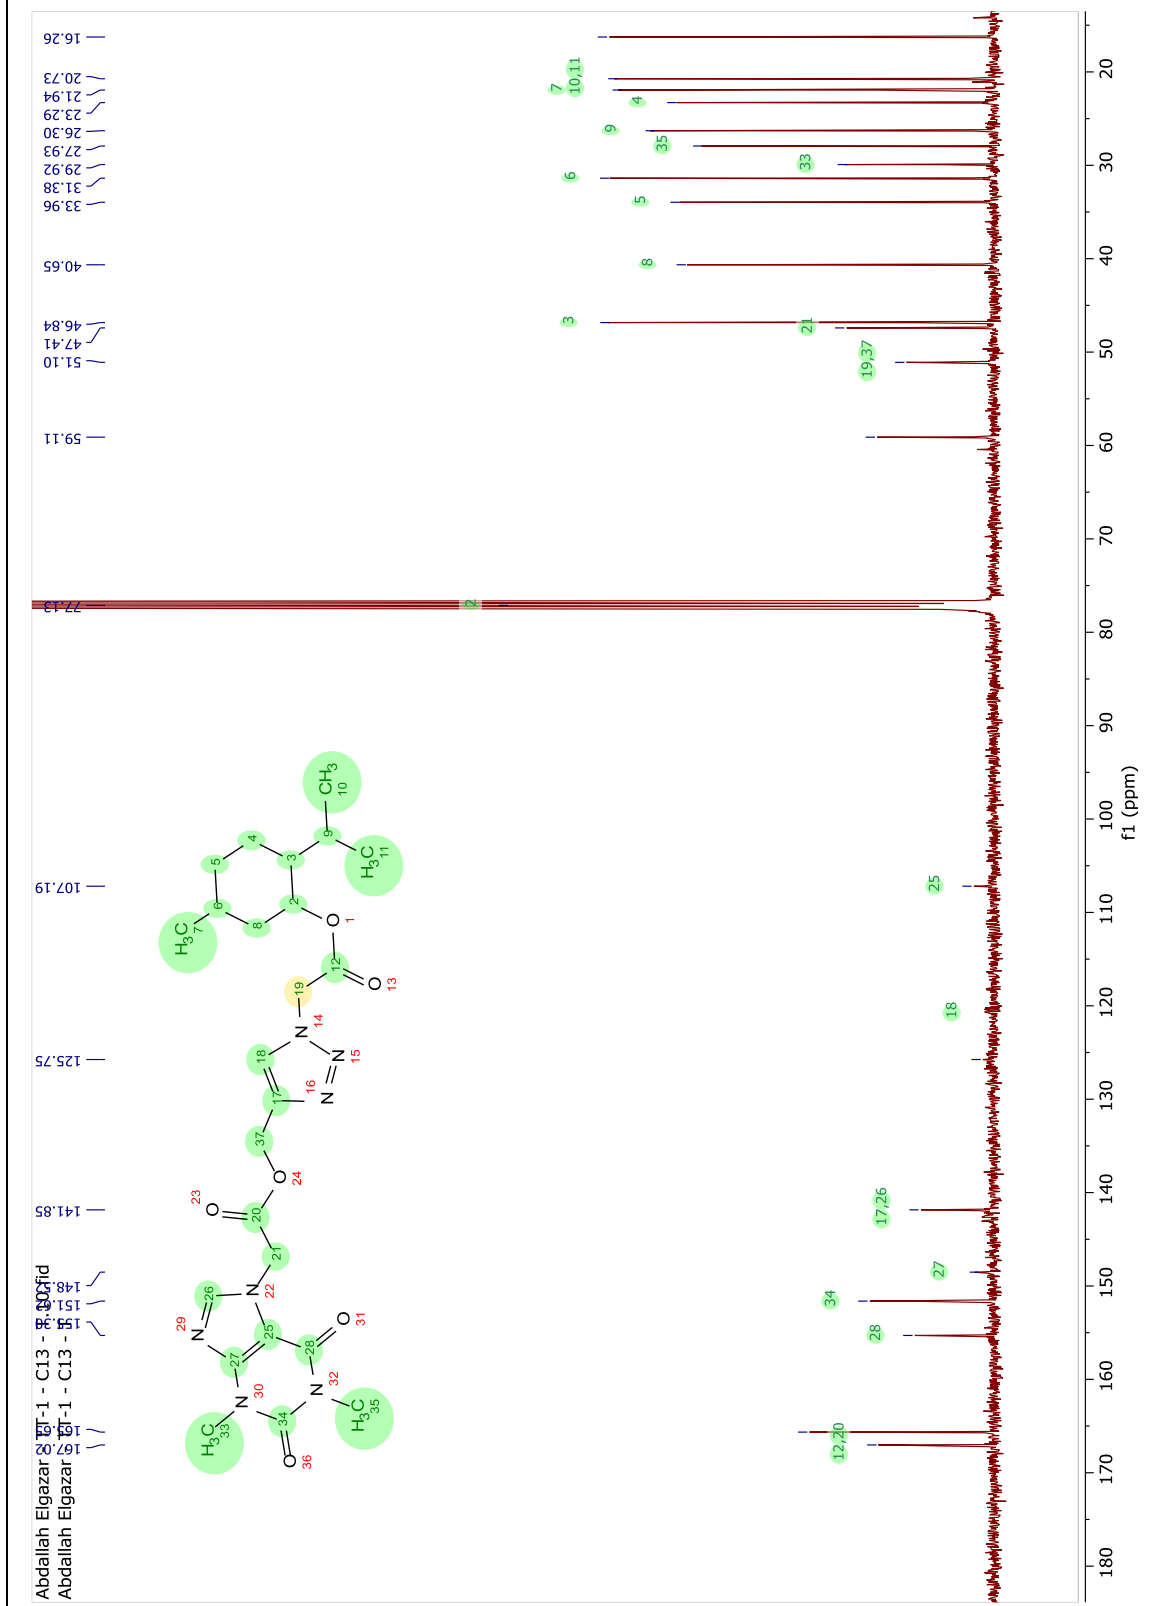

**<sup>13</sup>C NMR spectrum of compound 15a**

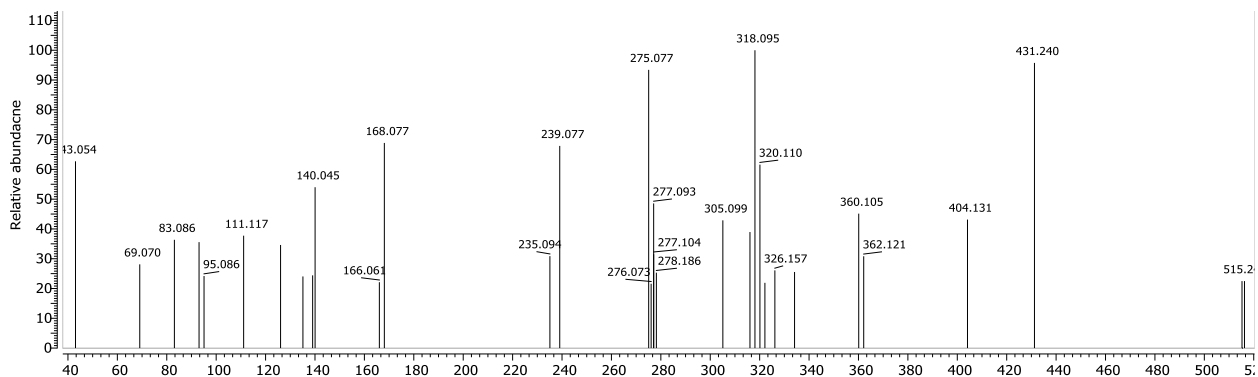

### Mass spectrum of compound 15a

Table.s14 NMR assignment of acefylline-triazole-thymol hybrid 15b

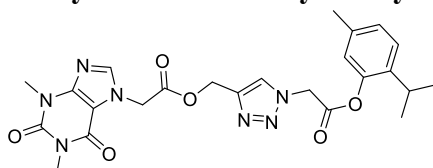

| Parent compound |      |                             | Hybrid compound          |      |                             |                          |
|-----------------|------|-----------------------------|--------------------------|------|-----------------------------|--------------------------|
| C/H             | Atom | <sup>1</sup> H(δ,ppm)(J,Hz) | <sup>13</sup> C (δ, ppm) | DEPT | <sup>1</sup> H(δ,ppm)(J,Hz) | <sup>13</sup> C (δ, ppm) |
| COO             |      | 10                          | 169.48                   | C    | --                          | 167.04                   |
| CO-LINKER       |      | --                          | 165.6                    | C    | --                          | 164.95                   |
| 1               |      | -                           | 154.3                    | C    | --                          | 155.26                   |
| 2               |      | --                          | 151.13                   | C    | --                          | 151.58                   |
| 1 <sup>1</sup>  |      | -                           | 150.2                    | C    | --                          | 148.37                   |
| 3               |      | --                          | 148.36                   | C    | --                          | 147.06                   |
| 4               |      | 8.04                        | 143.63                   | CH   | 7.65 (s, 1H)                | 142.39                   |
| C=TRIAZOLE      |      | --                          | 142                      | C    | --                          | 141.88                   |
| 3'              |      | -                           | 138.4                    | C    | --                          | 137.00                   |
| 6'              |      | --                          | 131.7                    | C    | --                          | 136.62                   |
| 4'              |      | 7.08                        | 126.3                    | CH   | 7.22 (d, J = 7.9 Hz, 1H)    | 127.99                   |
| 5'              |      | 7.08                        | 126.3                    | CH   | 7.08 (d, J = 7.9 Hz, 1H)    | 126.75                   |
| CH=TRIAZOLE     |      | 8                           | 122                      | CH   | 7.93 (s, 1H)                | 125.76                   |
| 2'              |      | 5.4                         | 116.9                    | CH   | 6.86 (s, 1H)                | 122.10                   |
| 5               |      | --                          | 106.83                   | C    | --                          | 107.11                   |
| CH2-C=          |      | 5.23                        | 60                       | CH2  | 5.48 (s, 2H)                | 59.06                    |
| CH2-LINKER      |      | 4.9                         | 50                       | CH2  | 5.12 (s, 2H)                | 53.49                    |
| CH2CO           |      | 5.07                        | 47.6                     | CH2  | 5.41 (s, 2H)                | 50.95                    |
| 6               |      | 3.44                        | 29.92                    | CH3  | 3.61 (s, 3H)                | 30.00                    |
| 7               |      | 3.20                        | 27.9                     | CH3  | 3.37 (s, 3H)                | 27.95                    |
| 7'              |      | 3.38                        | 25.5                     | CH   | 2.90 (p, J = 6.9 Hz, 1H)    | 27.18                    |
| 8'              |      | 1.05                        | 26.1                     | CH3  | 1.17 (d, J = 6.8 Hz, 3H)    | 23.02                    |
| 9'              |      | 1.05                        | 26.1                     | CH3  | 1.17 (d, J = 6.8 Hz, 3H)    | 23.02                    |
| 10'             |      | 2.2                         | 18.7                     | CH3  | 2.32 (s, 3H)                | 20.82                    |

Abdallah Elgazar - TT-2 - Hnmr - 1-10.fid

Abdallah Elgazar - TT-2 - Hnmr - 1-10

7.93  
7.65  
7.63  
7.28  
7.24  
7.23  
7.21  
7.09  
7.07  
6.86

1.27  
1.18  
1.16

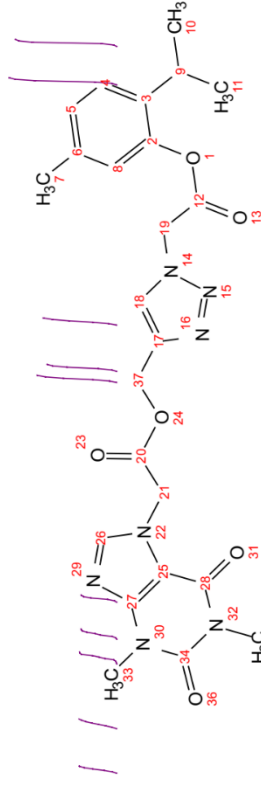

2.93  
2.92  
2.90  
2.88  
2.87

2.32

3.61  
3.37

5.48  
5.41  
5.12

A (s) 7.93  
B (s) 7.65  
C (d) 7.22  
E (s) 6.86

D (d) 7.08

F (s) 5.48  
G (s) 5.41  
I (s) 5.12

J (s) 3.61  
K (s) 3.37

L (d) 2.90

M (s) 2.32

N (d) 1.17

1.05  
1.06  
1.04  
1.00  
1.00

2.23  
1.94

3.01  
2.84

1.05

2.92

5.80

f1 (ppm)

### <sup>1</sup>H NMR spectrum of compound 15b

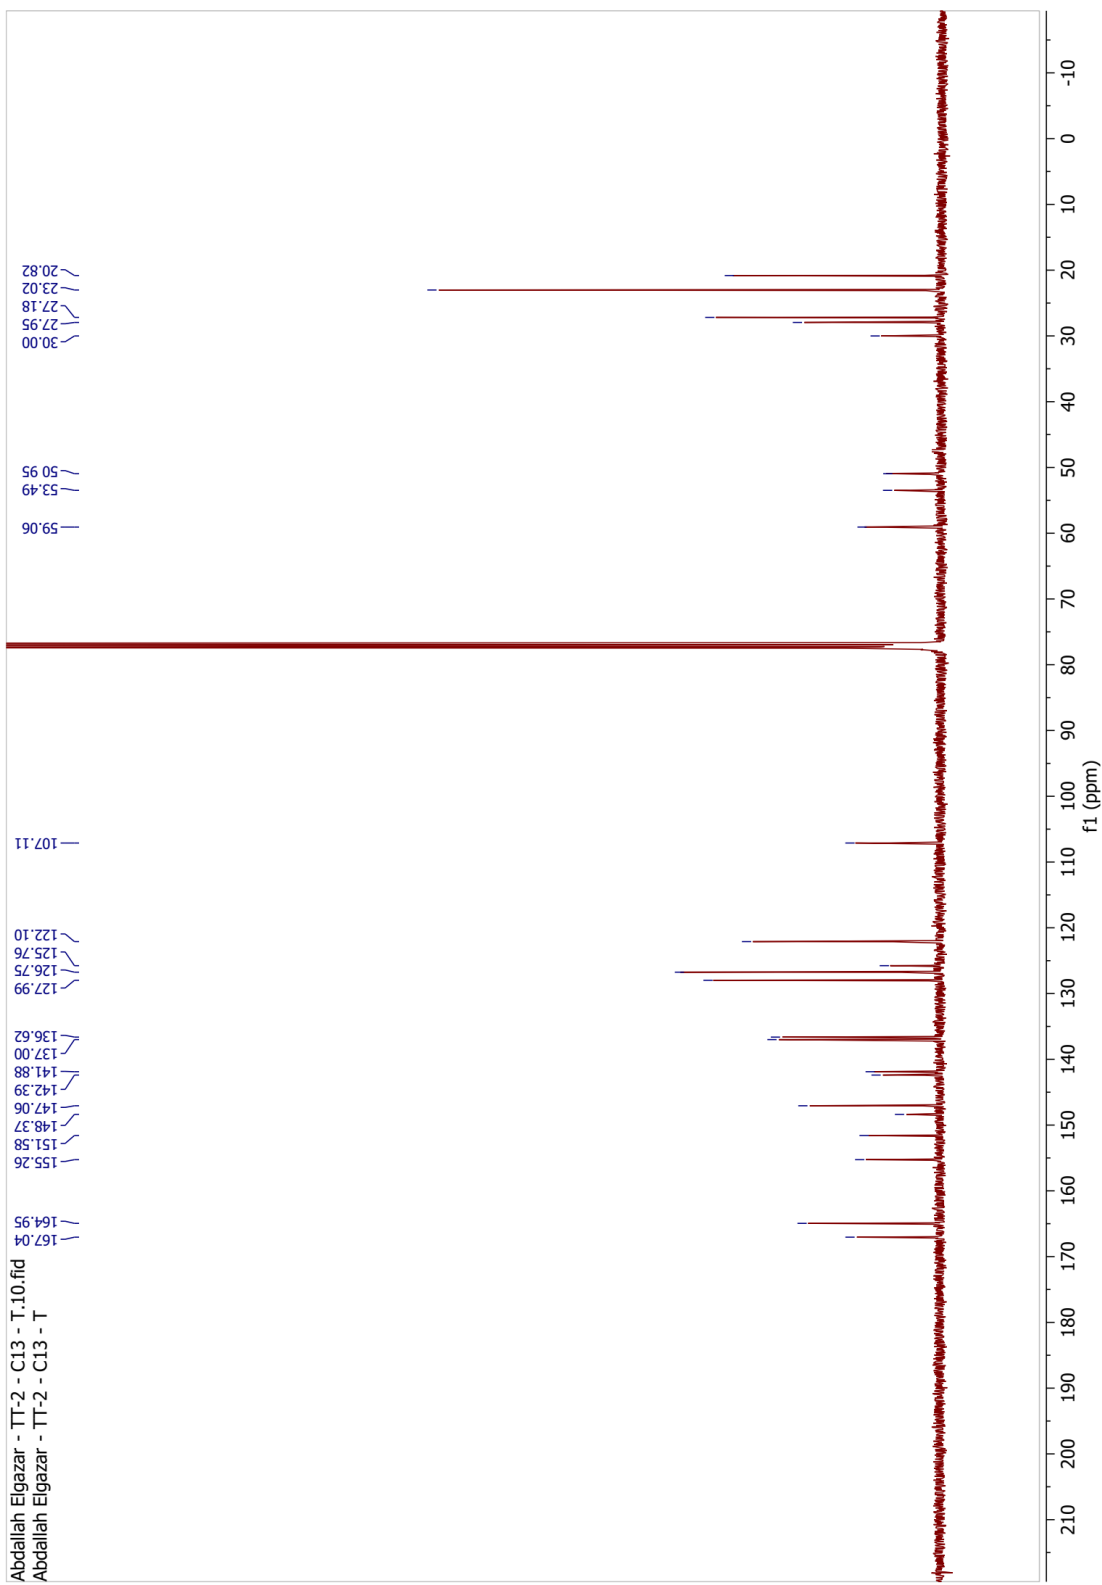

**<sup>13</sup>C NMR spectrum of compound 15b**

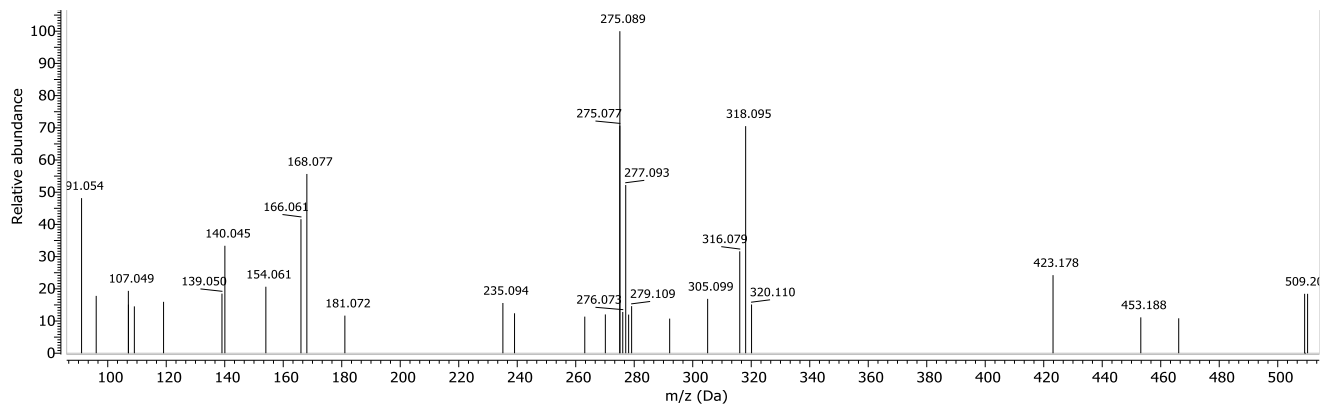

**Mass spectrum of compound 15c**

**Table.s15 NMR assignment of acefylline-triazole-coumarin hybrid 15c**

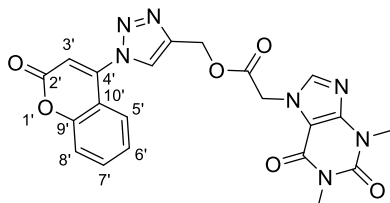

| Parent compound |      |                             |                          | Hybrid compound |                             |                          |
|-----------------|------|-----------------------------|--------------------------|-----------------|-----------------------------|--------------------------|
| C/H             | Atom | <sup>1</sup> H(δ,ppm)(J,Hz) | <sup>13</sup> C (δ, ppm) | DEPT            | <sup>1</sup> H(δ,ppm)(J,Hz) | <sup>13</sup> C (δ, ppm) |
| COOH            |      | 10                          | 169.48                   | C               | --                          | 168.05                   |
| 2'              |      | --                          | 166.1                    | C               | --                          | 159.92                   |
| 4'              |      | --                          | 162.32                   | C               | --                          | 154.98                   |
| 9'              |      | --                          | 153.98                   | C               | --                          | 151.48                   |
| 2               |      | --                          | 151.13                   | C               | --                          | 148.55                   |
| 3               |      | --                          | 148.36                   | C               | --                          | 146.30                   |
| 4               |      | 8.04                        | 143.63                   | CH              | 8.09 (s, 1H)                | 143.70                   |
| C=CTRIAOLE      |      | --                          | 142                      | C               | --                          | 142.72                   |
| 7'              |      | 7.65 (d, J = 7.8 Hz, 1H)    | 133.17                   | CH              | 7.85 – 7.75 (m, 1H)         | 134.04                   |
| 6'              |      | 7.38<br>7.34 (m, 1H)        | 124.39                   | CH              | 7.60 (d, J = 8.4 Hz, 1H)    | 127.35                   |
| 5'              |      | 7.83 (d, J = 7.2 Hz, 1H)    | 123.66                   | CH              | 7.85 – 7.75 (m, 1H)         | 125.90                   |
| C=CHTRIAZOLE    |      | 8                           | 122                      | CH              | 8.86 (s, 1H)                | 125.52                   |
| 8'              |      | 7.38<br>7.34 (m, 1H)        | 116.7                    | CH              | 7.45 (t, J = 7.8 Hz, 1H)    | 117.70                   |
| 10'             |      | --                          | 116.27                   | C               | --                          | 114.78                   |
| 5               |      | --                          | 106.83                   | C               | --                          | 111.28                   |
| 3'              |      | 5.60 (s, 1H)                | 91.46                    | CH              | 6.96 (s, 1H)                | 106.84                   |
| CH2-TRIAZOLE    |      | 5.23                        | 60                       | CH2             | 5.42 (s, 2H)                | 58.41                    |
| CH2CO           |      | 5.07                        | 47.6                     | CH2             | 5.27 (s, 2H)                | 47.68                    |
| 6               |      | 3.44                        | 29.92                    | CH3             | 3.44 (d, J = 6.8 Hz, 3H)    | 30.00                    |
| 7               |      | 3.20                        | 27.9                     | CH3             | 3.16 (s, 3H)                | 27.95                    |

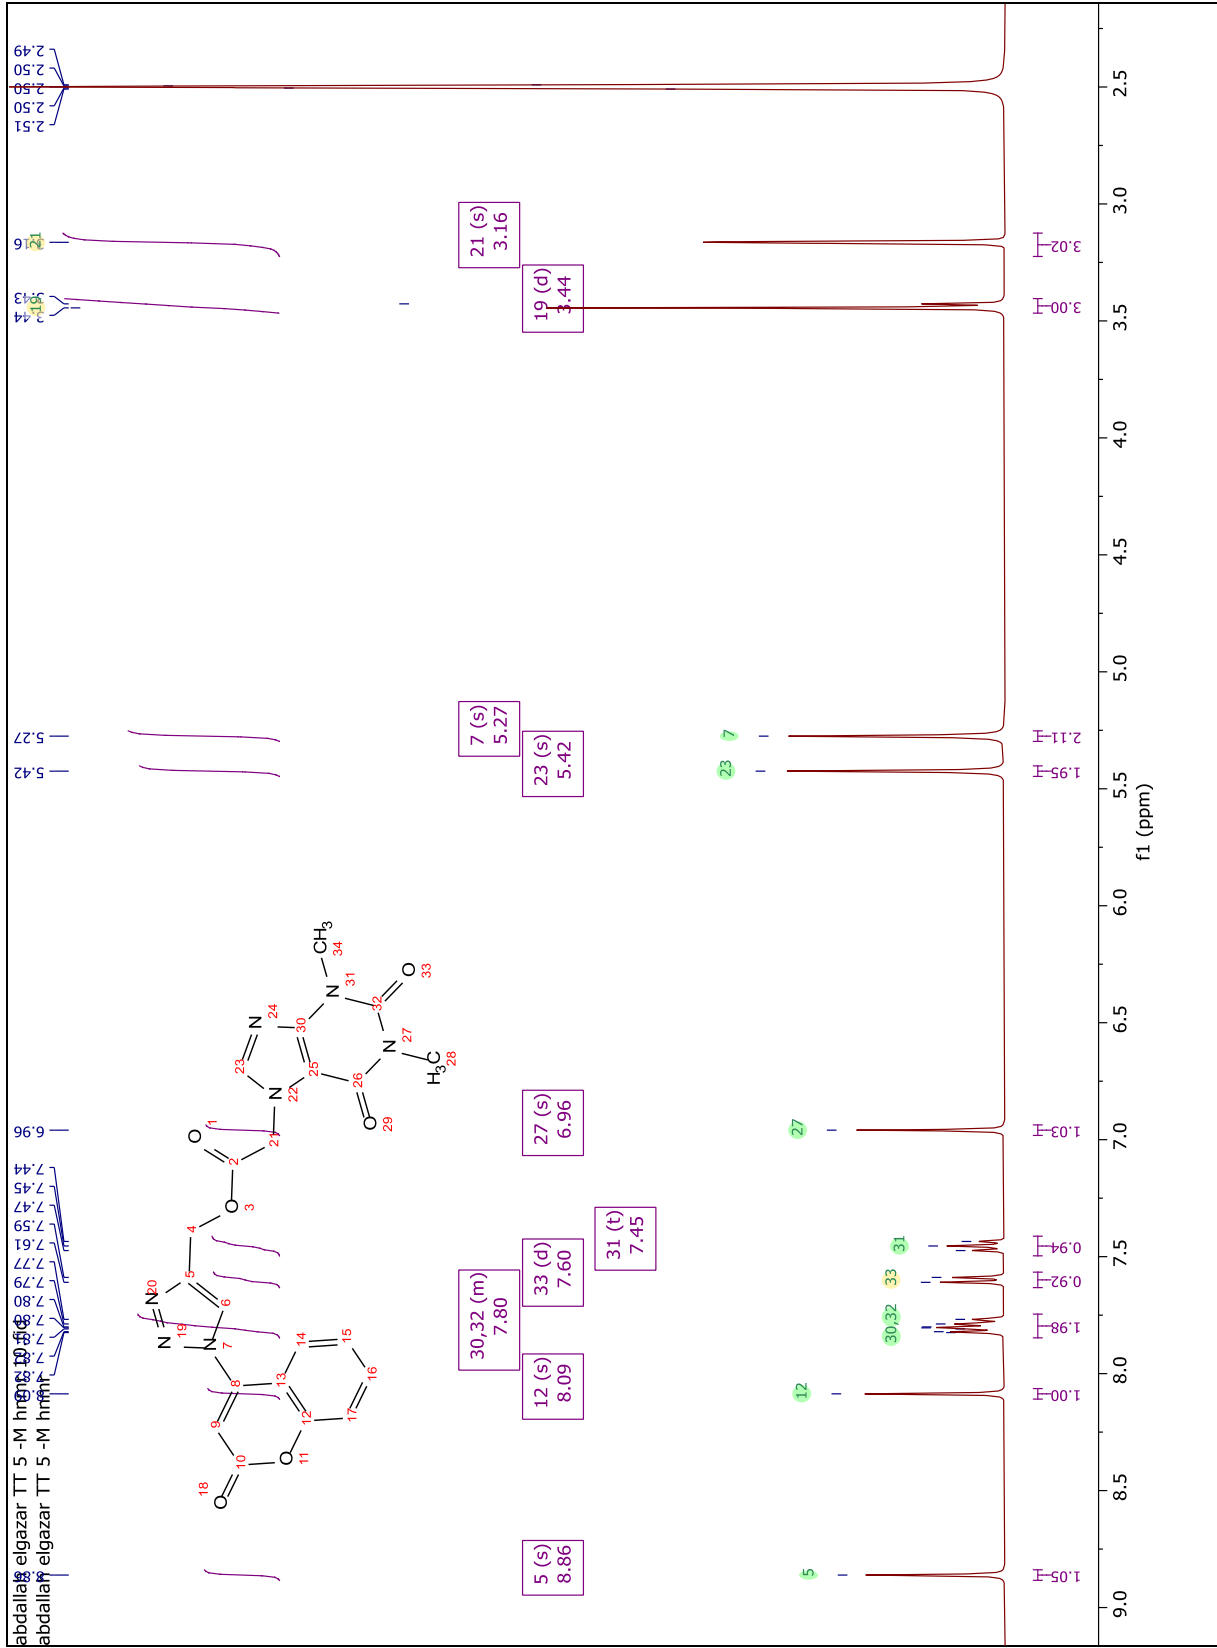

**<sup>1</sup>H NMR spectrum of compound 15c**

abdallah elgazar TT 5 -M c13.10.fid  
abdallah elgazar TT 5 -M c13

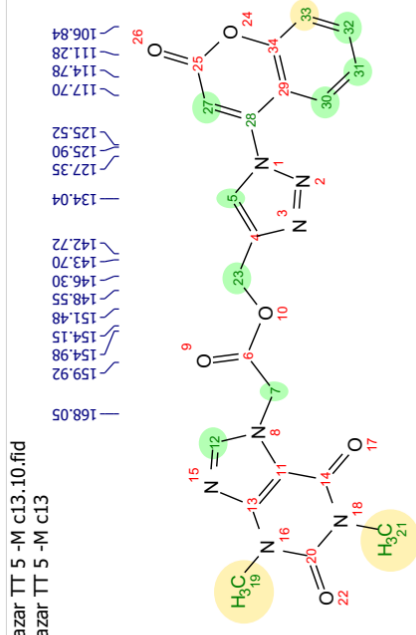

58.41  
47.66  
40.59 DMSO  
40.38 DMSO  
40.17 DMSO  
39.96 DMSO  
39.55 DMSO  
39.34 DMSO  
30.00  
27.95

19  
21

28

5

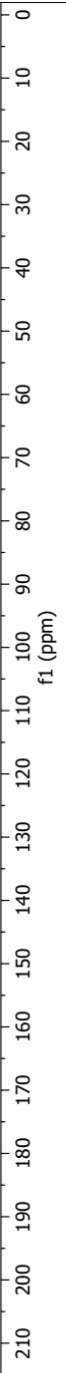

**<sup>13</sup>C NMR spectrum of compound 15c**

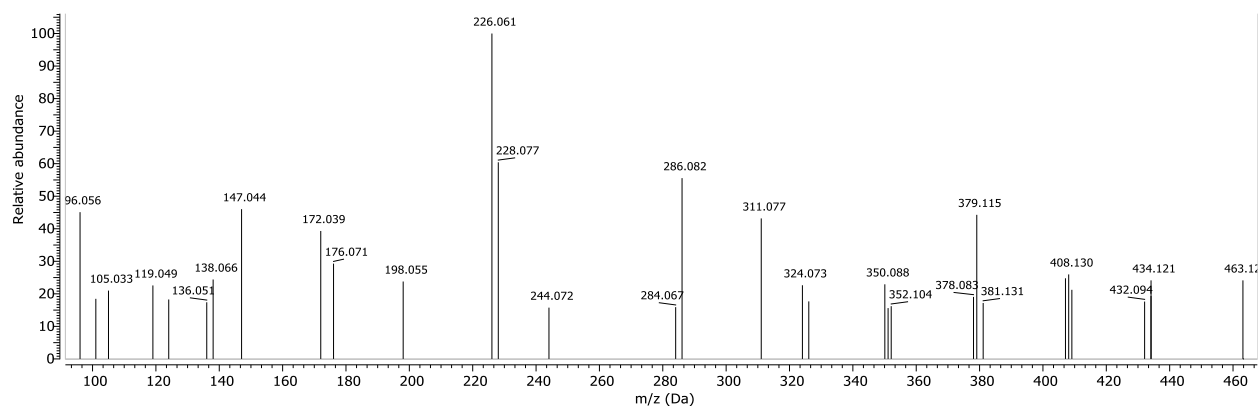

Mass spectrum of compound 15

Table s16. NMR assignment of acefylline-hydrazone-benzaldehyde hybrid 18a

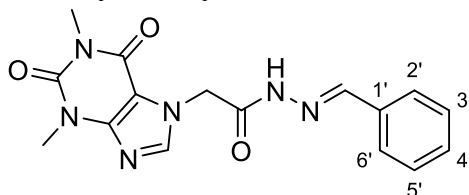

| C/H                | Parent compound |                                                |                                     | Hybrid compound |                                                |                                     |
|--------------------|-----------------|------------------------------------------------|-------------------------------------|-----------------|------------------------------------------------|-------------------------------------|
|                    | Atom            | $^1\text{H}(\delta, \text{ppm})(J, \text{Hz})$ | $^{13}\text{C}(\delta, \text{ppm})$ | DEPT            | $^1\text{H}(\delta, \text{ppm})(J, \text{Hz})$ | $^{13}\text{C}(\delta, \text{ppm})$ |
| COOH               | --              | --                                             | 169.48                              | C               | --                                             | 168.43                              |
| 1                  | -               | --                                             | 154.3                               | C               | --                                             | 154.95                              |
| 2                  | --              | --                                             | 151.13                              | C               | --                                             | 151.51                              |
| 3                  | --              | --                                             | 148.36                              | C               | --                                             | 148.34                              |
| 4                  | 8.04            | --                                             | 143.63                              | CH              | 8.12 – 8.05 (m, 1H)                            | 144.79                              |
| CH=N               | 10.2            | --                                             | 192.28                              | CH              | 8.12 – 8.05 (m, 1H)                            | 144.13                              |
| 1'                 | --              | --                                             | 136.47                              | C               | --                                             | 134.31                              |
| 4'                 | 7.64            | --                                             | 134.43                              | CH              | 7.47 (d, $J = 6.3$ Hz, 1H)                     | 130.61                              |
| 2'                 | 7.87            | --                                             | 129.68                              | CH              | 7.75 (d, $J = 7.0$ Hz, 1H)                     | 129.35                              |
| 6'                 | 7.87            | --                                             | 129.68                              | CH              | 7.75 (d, $J = 7.0$ Hz, 1H)                     | 129.35                              |
| 5'                 | 7.56            | --                                             | 129.68                              | CH              | 7.47 (d, $J = 6.3$ Hz, 1H)                     | 127.41                              |
| 3'                 | 7.56            | --                                             | 128.98                              | CH              | 7.47 (d, $J = 6.3$ Hz, 1H)                     | 127.41                              |
| 5                  | --              | --                                             | 106.83                              | C               | --                                             | 107.19                              |
| CH <sub>2</sub> CO | 5.07            | --                                             | 47.6                                | CH <sub>2</sub> | 5.57 (s, 2H)                                   | 47.87                               |
| 6                  | 3.44            | --                                             | 29.92                               | CH <sub>3</sub> | 3.47 (s, 3H)                                   | 29.95                               |
| 7                  | 3.20            | --                                             | 27.9                                | CH <sub>3</sub> | 3.21 (s, 3H)                                   | 27.91                               |
| NH                 | 11.25           | --                                             | --                                  | NH              | 11.80 (s, 1H)                                  | --                                  |



Abduallah Elgazar- TA 9-HNMR-DMSO-AF-10.fid  
Abduallah Elgazar- TA 9-HNMR-DMSO-AF

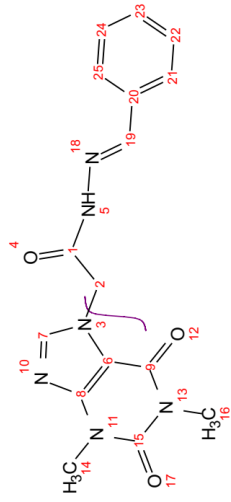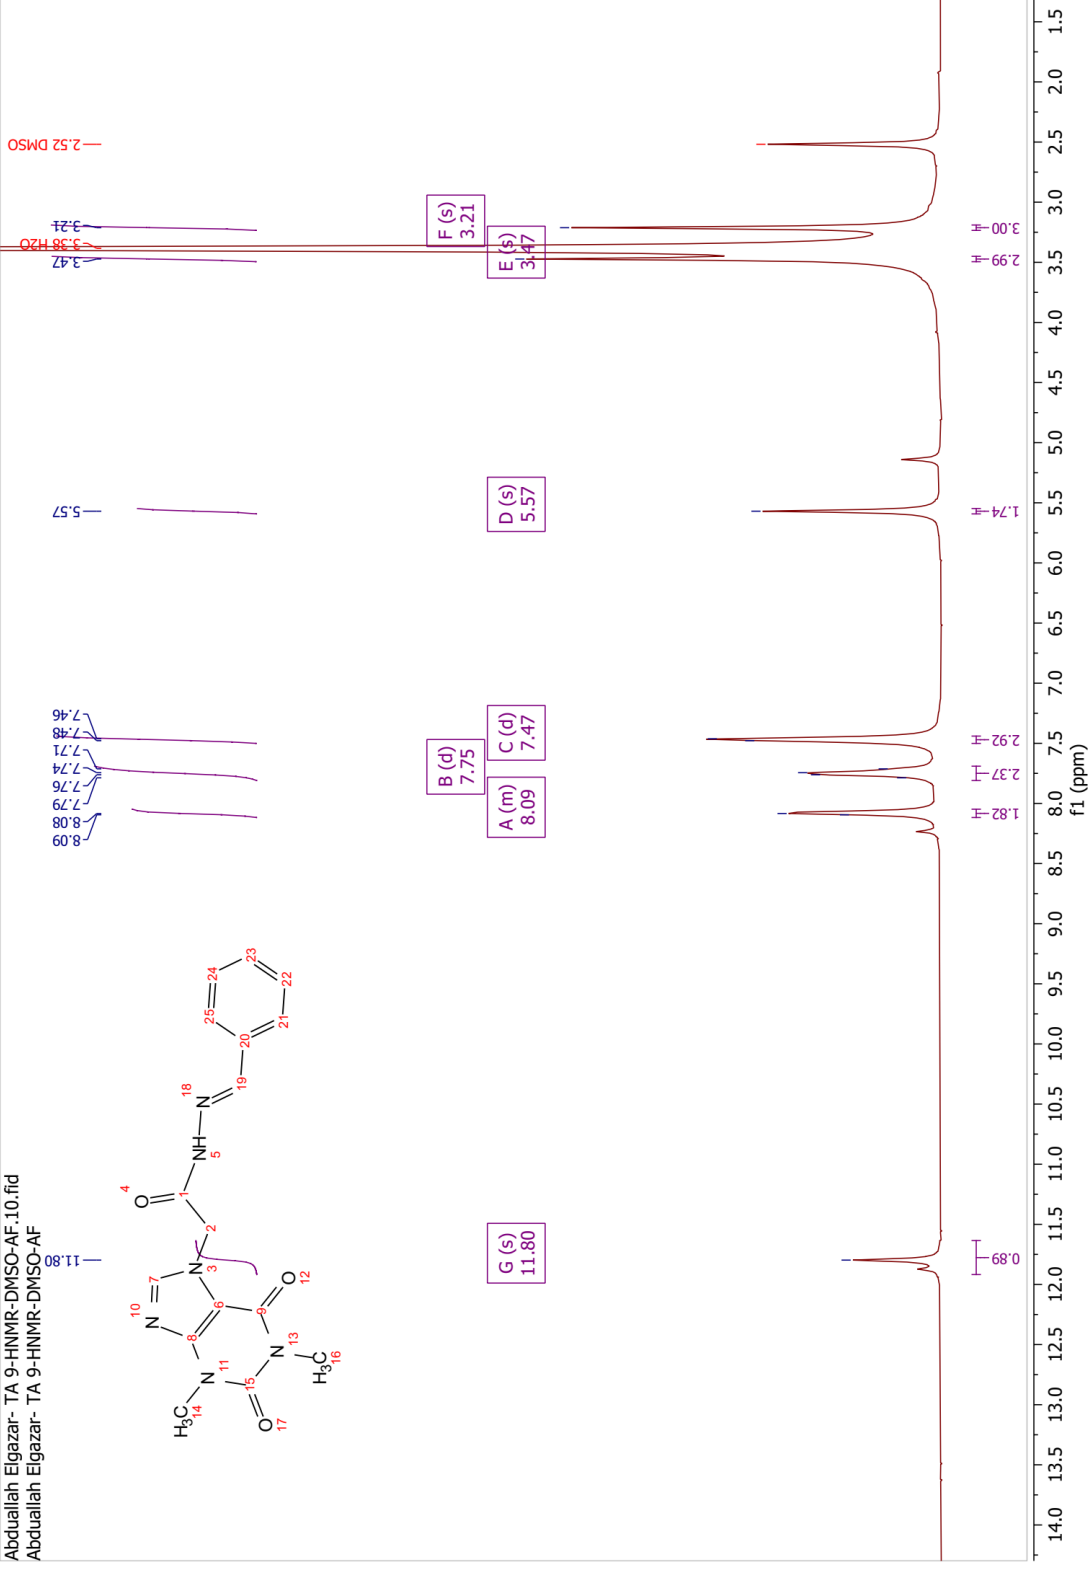

**<sup>1</sup>H NMR spectrum of compound 18a**

Abduallah Elgazar- TA 9-CNMR-DMSO-AE10.fid  
Abduallah Elgazar- TA 9-CNMR-DMSO-AE

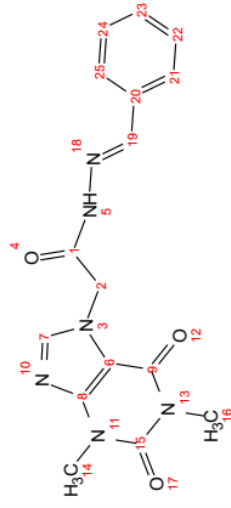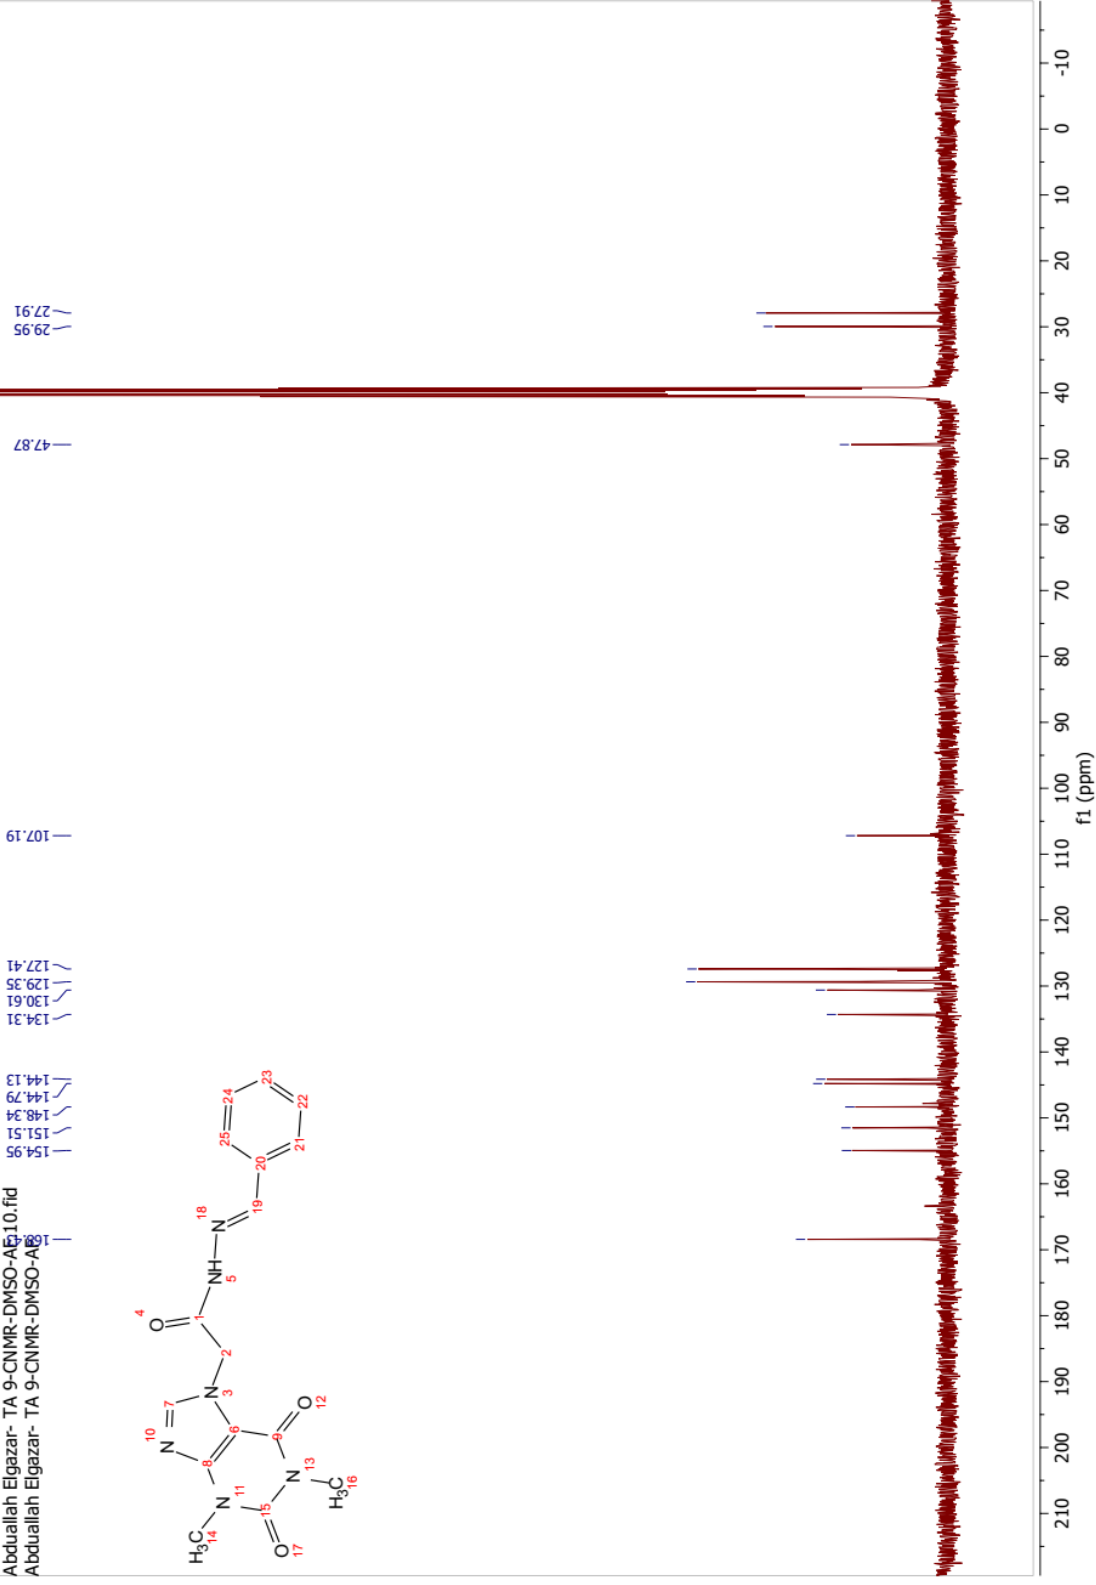

**<sup>13</sup>C NMR spectrum of compound 18a**

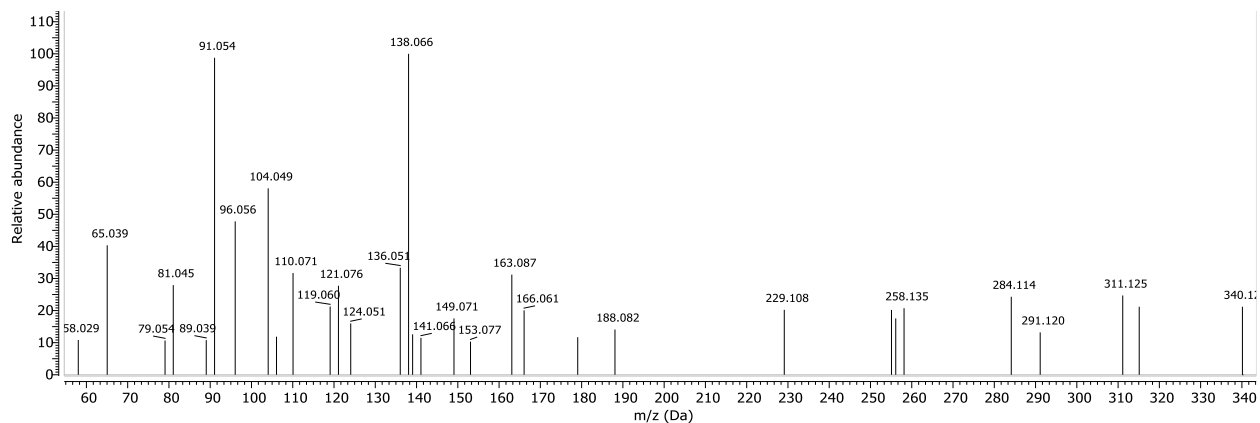

**Mass spectrum of compound 18a**

**Table.s17 NMR assignment of acefylline-hydrazone-hydroxy benzaldehyde hybrid 18b**

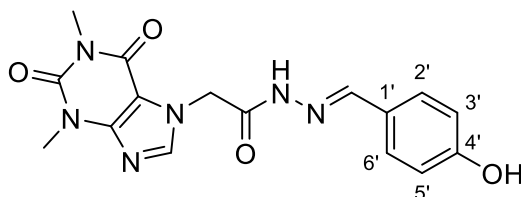

| Parent compound    |      |                                                       | Hybrid compound                     |                 |                                                       |                                     |
|--------------------|------|-------------------------------------------------------|-------------------------------------|-----------------|-------------------------------------------------------|-------------------------------------|
| C/H                | Atom | $^1\text{H}(\delta, \text{ppm})(\text{J}, \text{Hz})$ | $^{13}\text{C}(\delta, \text{ppm})$ | DEPT            | $^1\text{H}(\delta, \text{ppm})(\text{J}, \text{Hz})$ | $^{13}\text{C}(\delta, \text{ppm})$ |
| CH=N               |      | 10.6                                                  | 191.26                              | CH              | 8.06 (s, 1H)                                          | 145.04                              |
| COOH               |      | --                                                    | 169.48                              | C               | --                                                    | 168.02                              |
| 4'                 |      | --                                                    | 161.65                              | C               | --                                                    | 159.87                              |
| 1                  |      | -                                                     | 154.3                               | C               | -                                                     | 154.92                              |
| 2                  |      | --                                                    | 151.13                              | C               | --                                                    | 151.50                              |
| 3                  |      | --                                                    | 148.36                              | C               | --                                                    | 148.30                              |
| 4                  |      | 8.04                                                  | 143.63                              | CH              | 7.95 (s, 1H)                                          | 144.12                              |
| 2'                 |      | 7.78                                                  | 132.56                              | CH              | 7.56 (dd, $J = 9.6, 2.9$ Hz, 1H)                      | 129.14                              |
| 6'                 |      | 7.78                                                  | 132.56                              | CH              | 7.56 (dd, $J = 9.6, 2.9$ Hz, 1H)                      | 129.14                              |
| 1'                 |      | --                                                    | 129.94                              | C               | --                                                    | 125.33                              |
| 3'                 |      | 6.9                                                   | 116.06                              | CH              | 6.87 – 6.79 (m, 1H)                                   | 116.18                              |
| 5'                 |      | 6.9                                                   | 116.06                              | CH              | 6.87 – 6.79 (m, 1H)                                   | 116.14                              |
| 5                  |      | --                                                    | 106.83                              | C               | --                                                    | 107.18                              |
| CH <sub>2</sub> CO |      | 5.07                                                  | 47.6                                | CH <sub>2</sub> | 5.51 (s, 2H)                                          | 47.83                               |
| 6                  |      | 3.44                                                  | 29.92                               | CH <sub>3</sub> | 3.46 (s, 3H)                                          | 29.93                               |
| 7                  |      | 3.20                                                  | 27.9                                | CH <sub>3</sub> | 3.21 (d, $J = 1.7$ Hz, 3H)                            | 27.89                               |
| NH                 |      | 11                                                    | --                                  | NH              | 11.58 (s, 1H)                                         | --                                  |
| OH                 |      | 9                                                     | --                                  | OH              | 9.98 (s, 1H)                                          | --                                  |

Abduallah Elgazar- T&A 1-H1NMR-DMSO-AF.10.fid  
Abduallah Elgazar- T&A 1-H1NMR-DMSO-AF

8.06  
7.95  
7.58  
7.57  
7.56  
7.55  
7.53  
6.85  
6.85  
6.84  
6.83  
5.51  
3.46  
3.21  
3.20  
2.52  
2.51

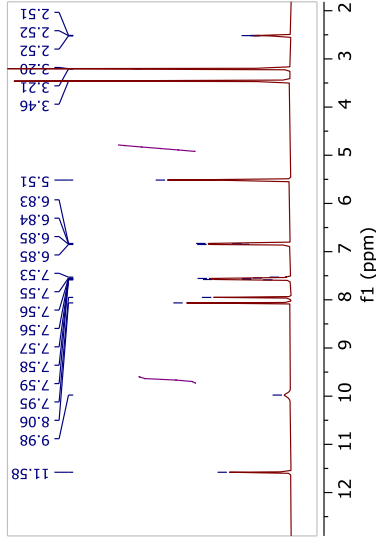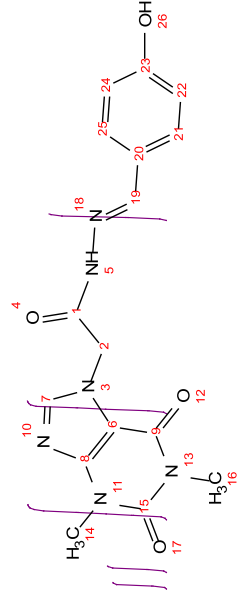

| Integration | Chemical Shift (ppm) | Multiplicity |
|-------------|----------------------|--------------|
| B (s)       | 11.58                | 11.58        |
| C (s)       | 9.98                 | 9.98         |
| F (s)       | 7.95                 | 7.95         |
| E (s)       | 8.06                 | 8.06         |
| G (dd)      | 7.56                 | 7.56         |
| H (m)       | 6.84                 | 6.84         |
| I (s)       | 5.51                 | 5.51         |
| J (s)       | 3.46                 | 3.46         |
| K (s)       | 3.21                 | 3.21         |
| L (d)       | 3.21                 | 3.21         |

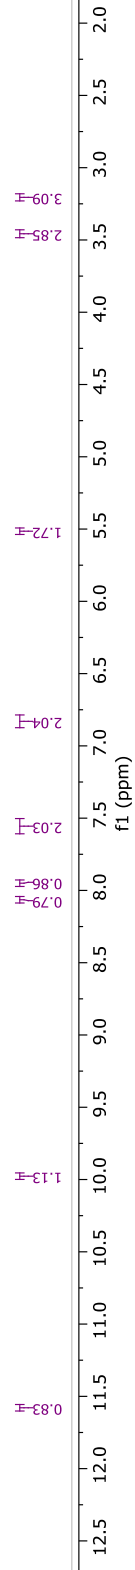

**<sup>1</sup>H NMR spectrum of compound 18b**

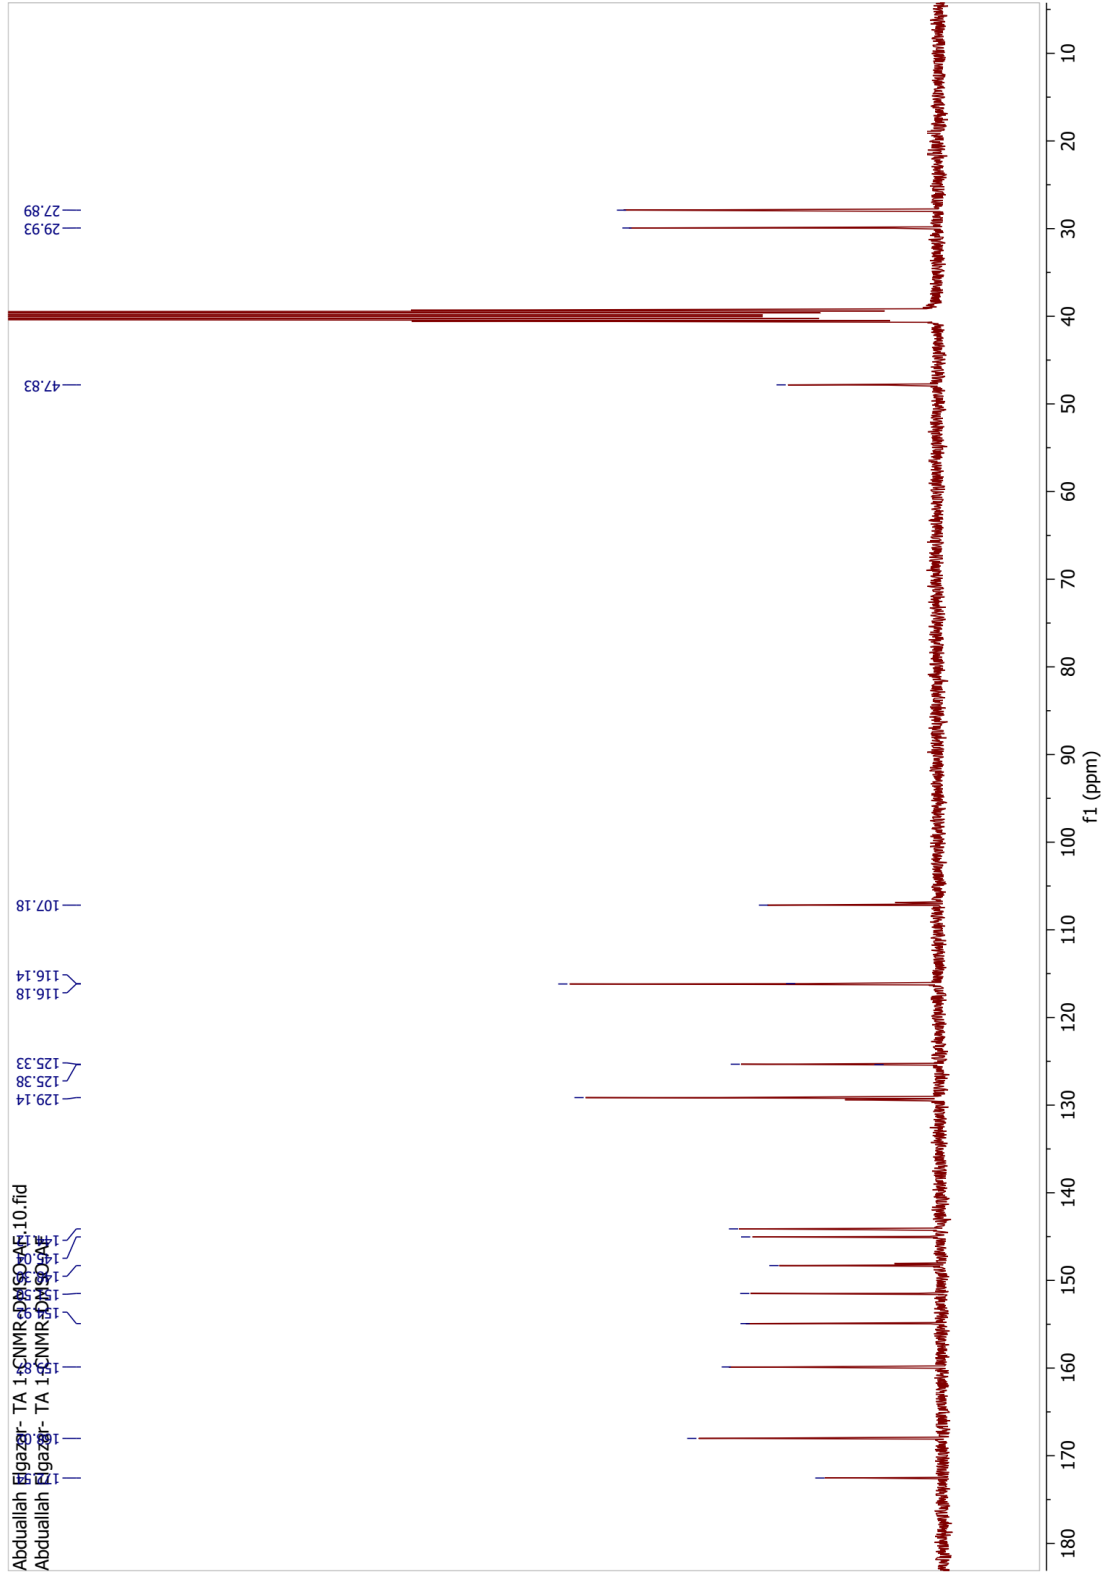

**<sup>13</sup>C NMR spectrum of compound 18b**

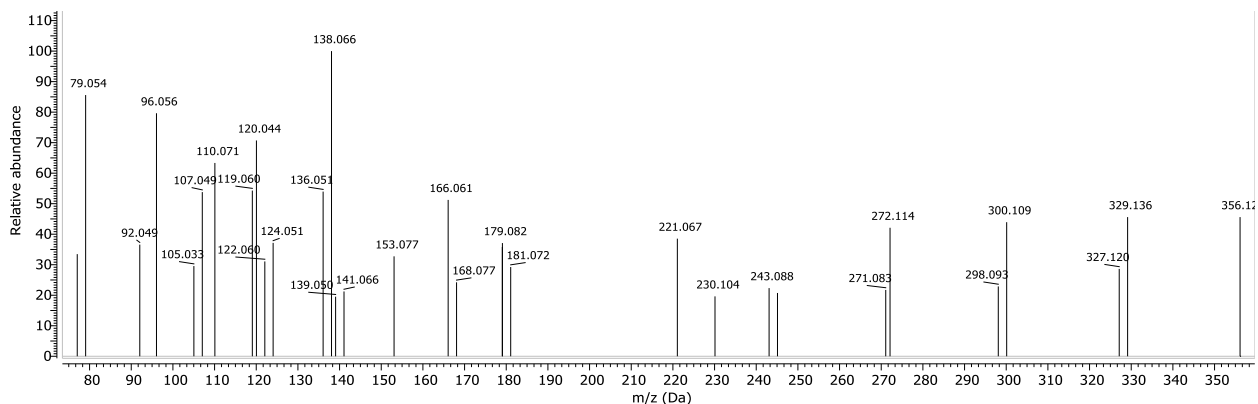

**Mass spectrum of compound 18b**

**Table.s18 NMR assignment of acefylline-hydrazone-2,5 dimethoxy benzaldehyde hybrid 18c**

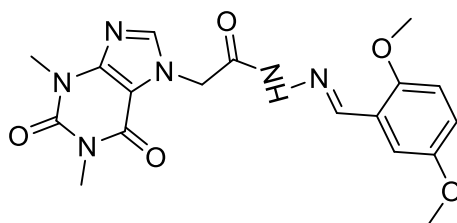

| Parent compound    |      |                             |                         | Hybrid compound |                             |                         |
|--------------------|------|-----------------------------|-------------------------|-----------------|-----------------------------|-------------------------|
| C/H                | Atom | <sup>1</sup> H(δ,ppm)(J,Hz) | <sup>13</sup> C(δ, ppm) | DEPT            | <sup>1</sup> H(δ,ppm)(J,Hz) | <sup>13</sup> C(δ, ppm) |
| COOH               |      | --                          | 169.48                  | C               | --                          | 168.35                  |
| 2'                 |      | --                          | 156.73                  | C               | --                          | 154.90                  |
| 1                  |      | -                           | 154.3                   | C               | -                           | 153.71                  |
| 5'                 |      | --                          | 153.69                  | C               | --                          | 152.64                  |
| 2                  |      | --                          | 151.13                  | C               | --                          | 151.48                  |
| 3                  |      | --                          | 148.36                  | C               | --                          | 148.30                  |
| CH=N               |      | 10.2                        | 189.37                  | CH              | 8.36 (s, 1H)                | 144.06                  |
| 4                  |      | 8.04                        | 143.63                  | CH              | 8.07 (d, J = 6.5 Hz, 1H)    | 140.16                  |
| 1'                 |      | --                          | 125.03                  | C               | --                          | 122.85                  |
| 4'                 |      | 7.78                        | 123.29                  | CH              | 7.40 (d, J = 3.0 Hz, 1H)    | 117.76                  |
| 6'                 |      | 6.4                         | 113.38                  | CH              | 7.10 – 6.97 (m, 1H)         | 113.75                  |
| 3'                 |      | 6.5                         | 110.60                  | CH              | 7.10 – 6.97 (m, 1H)         | 109.96                  |
| 5                  |      | --                          | 106.83                  | C               | --                          | 107.18                  |
| OCH3               |      | 3.8                         | 56.17                   | CH <sub>3</sub> | 3.82 (s, 3H)                | 56.66                   |
| OCH3               |      | 3.8                         | 56.16                   | CH <sub>3</sub> | 3.76 (s, 3H)                | 55.95                   |
| CH <sub>2</sub> CO |      | 5.07                        | 47.6                    | CH <sub>2</sub> | 5.55 (s, 2H)                | 47.91                   |
| 6                  |      | 3.44                        | 29.92                   | CH <sub>3</sub> | 3.46 (s, 3H)                | 29.93                   |
| 7                  |      | 3.20                        | 27.9                    | CH <sub>3</sub> | 3.20 (s, 3H)                | 27.89                   |
| NH                 |      | 11                          | --                      | NH              | 11.74 (s, 1H)               | --                      |



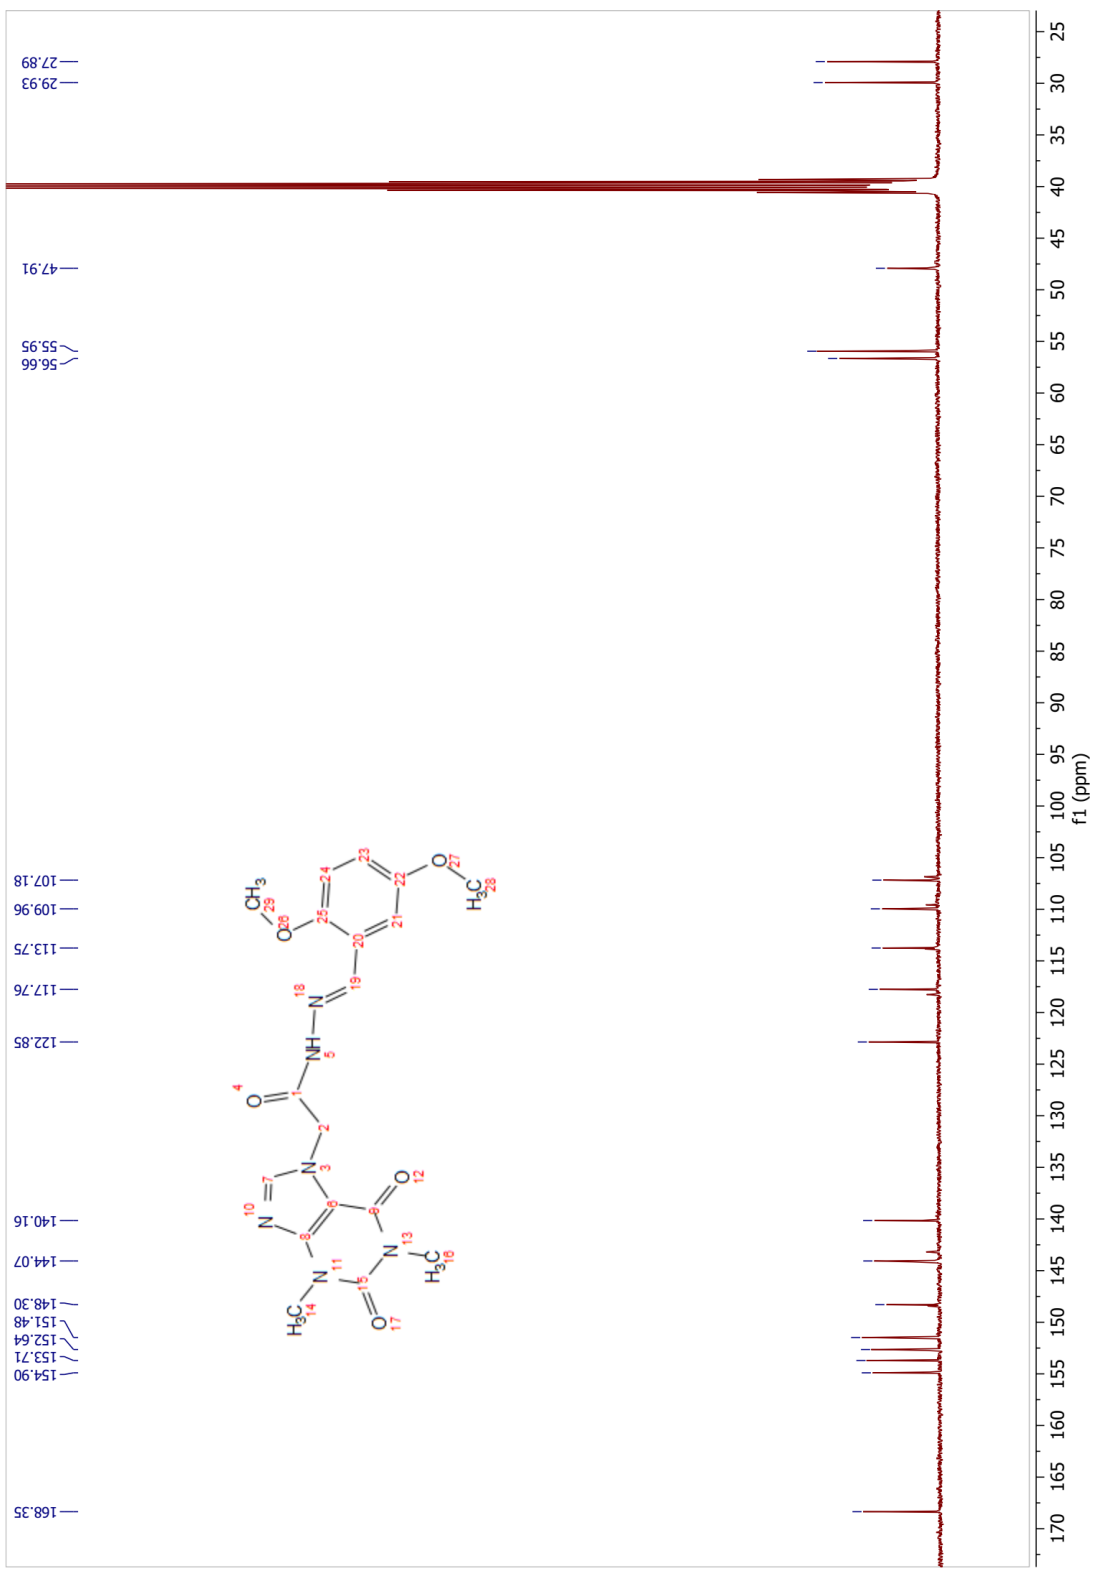

**<sup>13</sup>C NMR spectrum of compound 18c**



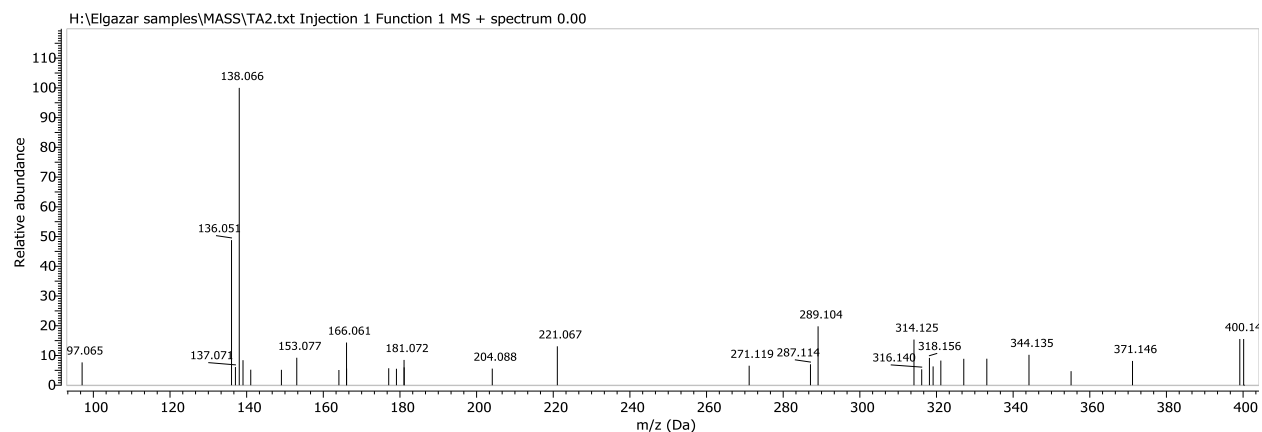

**Mass spectrum of compound 18c**

**Table.s19 NMR assignment of acefylline-hydrazone-3,4 dimethoxy benzaldehyde hybrid 18d**

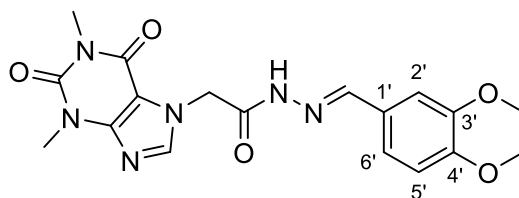

| C/H   | Parent compound |                             |                         | Hybrid compound |                             |                         |
|-------|-----------------|-----------------------------|-------------------------|-----------------|-----------------------------|-------------------------|
|       | Atom            | <sup>1</sup> H(δ,ppm)(J,Hz) | <sup>13</sup> C(δ, ppm) | DEPT            | <sup>1</sup> H(δ,ppm)(J,Hz) | <sup>13</sup> C(δ, ppm) |
| COOH  | --              | --                          | 169.48                  | C               | --                          | 168.19                  |
| 1     | -               | -                           | 154.3                   | C               | --                          | 154.95                  |
| 4'    | --              | --                          | 154.61                  | C               | --                          | 151.53                  |
| 2     | --              | --                          | 151.13                  | C               | --                          | 151.22                  |
| 3'    | --              | --                          | 149.73                  | C               | --                          | 149.56                  |
| 3     | --              | --                          | 148.36                  | C               | --                          | 148.36                  |
| 4     | 8.04            | 8.04                        | 143.63                  | CH              | 7.98 (s, 1H)                | 144.89                  |
| CH=N  | 10.6            | 10.6                        | 191.26                  | CH              | 8.08 (d, J = 3.3 Hz, 1H)    | 144.12                  |
| 1'    | --              | --                          | 130.27                  | C               | --                          | 127.08                  |
| 6'    | 7.47            | 7.47                        | 126.59                  | CH              | 7.36 (d, J = 1.9 Hz, 1H)    | 121.89                  |
| 2'    | 7.41            | 7.41                        | 110.62                  | CH              | 7.26 – 7.19 (m, 1H)         | 112.06                  |
| 5'    | 6.99            | 6.99                        | 109.29                  | CH              | 7.03 (d, J = 8.3 Hz, 1H)    | 109.06                  |
| 5     | --              | --                          | 106.83                  | C               | --                          | 107.23                  |
| OCH3  | 3.8             | 3.8                         | 56.16                   | CH <sub>3</sub> | 3.82 (d, J = 4.7 Hz, 3H)    | 56.07                   |
| OCH3  | 3.8             | 3.8                         | 56.17                   | CH <sub>3</sub> | 3.82 (d, J = 4.7 Hz, 3H)    | 56.00                   |
| CH2CO | 5.07            | 5.07                        | 47.6                    | CH <sub>2</sub> | 5.55 (s, 2H)                | 47.92                   |
| 6     | 3.44            | 3.44                        | 29.92                   | CH <sub>3</sub> | 3.46 (d, J = 3.7 Hz, 3H)    | 29.95                   |
| 7     | 3.20            | 3.20                        | 27.9                    | CH <sub>3</sub> | 3.21 (d, J = 1.7 Hz, 3H)    | 27.90                   |
| NH    | 11              | 11                          | --                      | NH              | 11.68 (s, 1H)               | --                      |



Abduallah Elgazar- TA 3-CNMR-DMSO-A1510.fid  
Abduallah Elgazar- TA 3-CNMR-DMSO-A1510

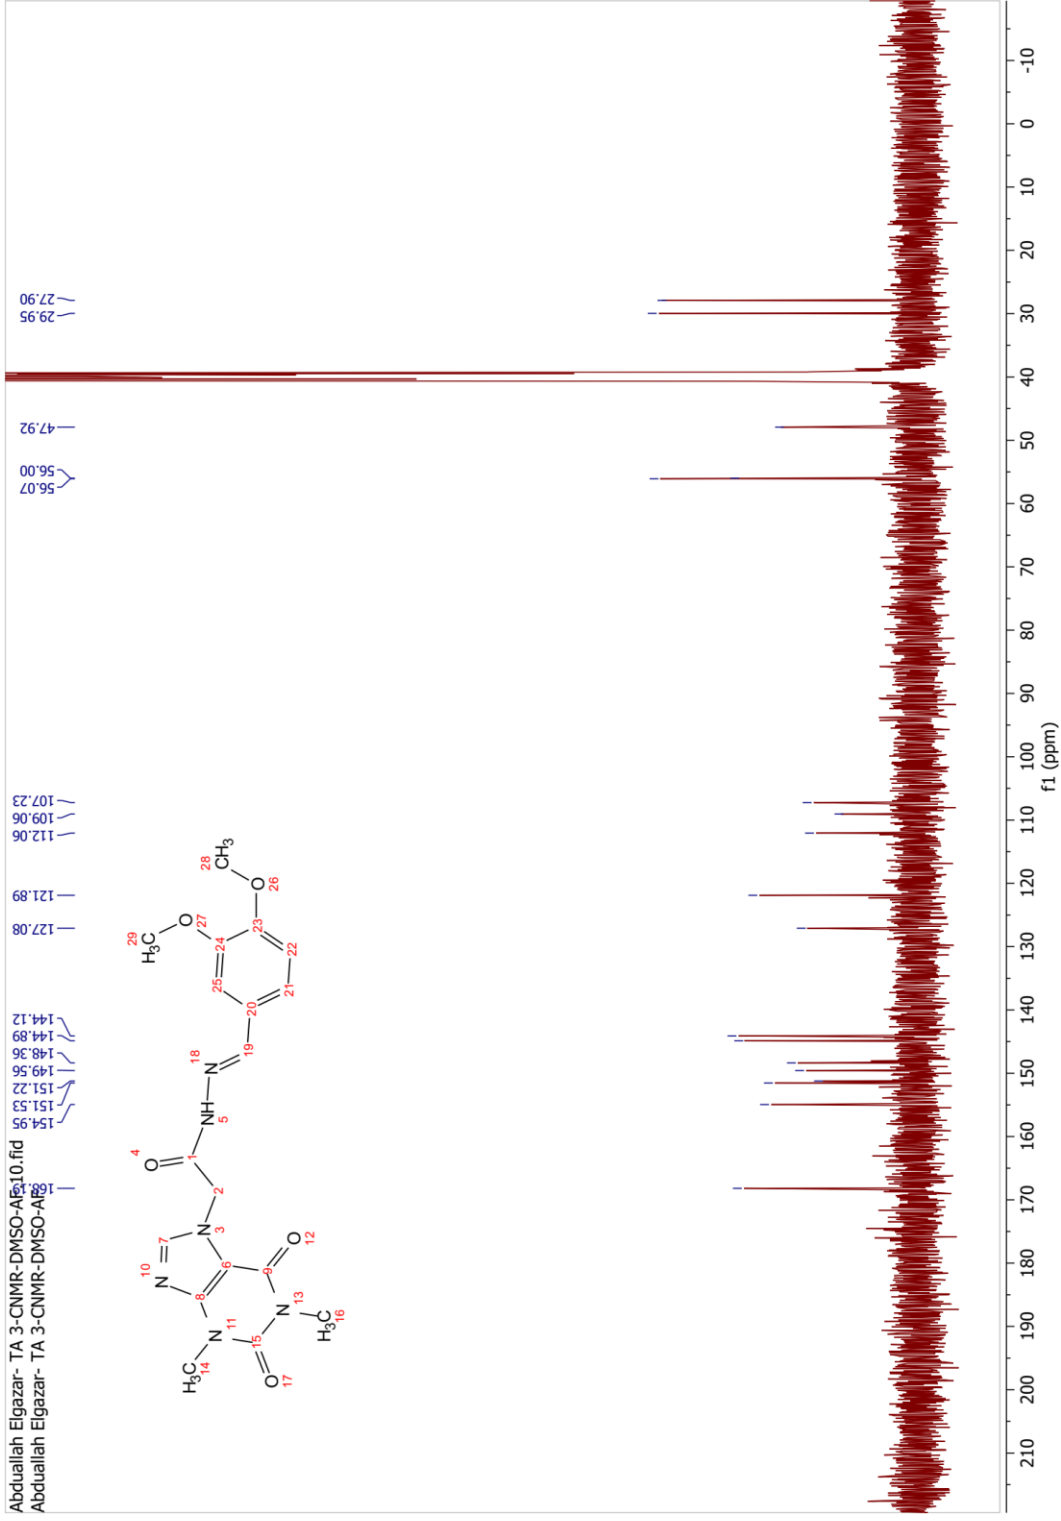

<sup>13</sup>C NMR spectrum of compound 18d

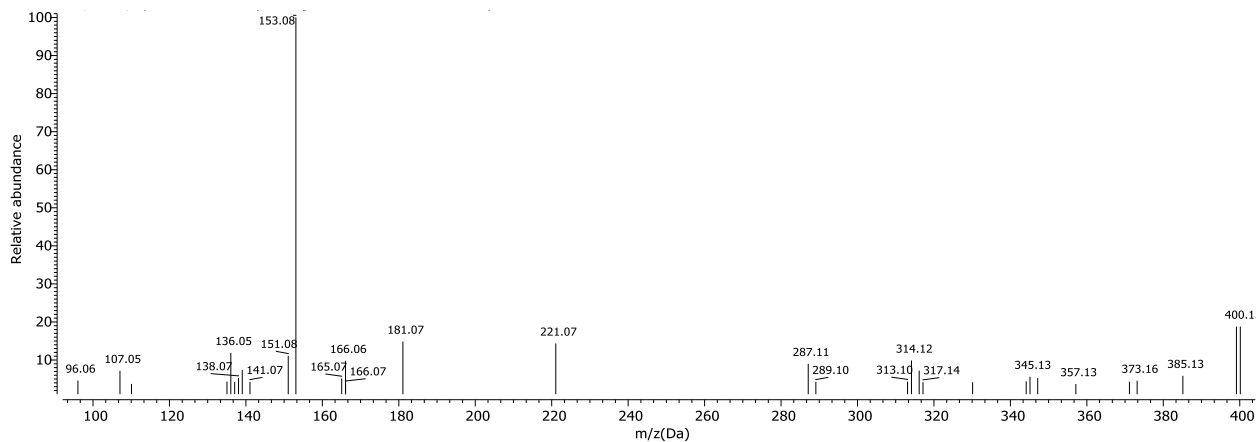

Mass spectrum of compound 18d

Table.s20 NMR assignment of acefylline-hydrazone-3,4,5 trimethoxy benzaldehyde hybrid 18e.

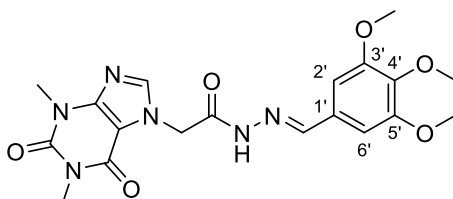

| Parent compound    |      |                             |                         | Hybrid compound |                                   |                         |
|--------------------|------|-----------------------------|-------------------------|-----------------|-----------------------------------|-------------------------|
| C/H                | Atom | <sup>1</sup> H(δ,ppm)(J,Hz) | <sup>13</sup> C(δ, ppm) | DEPT            | <sup>1</sup> H(δ,ppm)(J,Hz)       | <sup>13</sup> C(δ, ppm) |
| COOH               | --   | --                          | 169.48                  | C               | --                                | 168.42                  |
| 1                  | -    | --                          | 154.3                   | C               | --                                | 154.94                  |
| 3'                 | --   | --                          | 153.72                  | C               | --                                | 153.67                  |
| 5'                 | --   | --                          | 153.72                  | C               | --                                | 153.67                  |
| 2                  | --   | --                          | 151.13                  | C               | --                                | 151.52                  |
| 3                  | --   | --                          | 148.36                  | C               | --                                | 148.36                  |
| 4'                 | --   | --                          | 143.72                  | C               | --                                | 144.64                  |
| CH=N               | 10.6 | --                          | 191.26                  | CH              | 8.09 (s, 1H)                      | 144.11                  |
| 4                  | 8.04 | --                          | 143.63                  | CH              | 7.98 (s, 1H)                      | 139.63                  |
| 1'                 | --   | --                          | 131.84                  | C               | --                                | 129.84                  |
| 5                  | --   | --                          | 106.83                  | C               | --                                | 107.22                  |
| 2'                 | 7.13 | --                          | 106.81                  | CH              | 7.05 (d, <i>J</i> = 13.7 Hz, 1H)  | 104.85                  |
| 6'                 | 7.13 | --                          | 106                     | CH              | 7.05 (d, <i>J</i> = 13.7 Hz, 1H)  | 104.66                  |
| OCH3               | 3.93 | --                          | 60.93                   | CH <sub>3</sub> | 3.85 (s, 3H)                      | 60.61                   |
| OCH3               | 3.93 | --                          | 60.93                   | CH <sub>3</sub> | 3.85 (s, 3H)                      | 56.43                   |
| OCH3               | 3.93 | --                          | 60.93                   | CH <sub>3</sub> | 3.71 (s, 3H)                      | 56.43                   |
| CH <sub>2</sub> CO | 5.07 | --                          | 47.6                    | CH <sub>2</sub> | 5.57 (s, 2H)                      | 47.98                   |
| 6                  | 3.44 | --                          | 29.92                   | CH <sub>3</sub> | 3.47 (s, 3H)                      | 29.97                   |
| 7                  | 3.20 | --                          | 27.9                    | CH <sub>3</sub> | 3.21 (s, 3H)                      | 27.91                   |
| NH                 | 11   | --                          | --                      | NH              | 11.82 (d, <i>J</i> = 12.5 Hz, 1H) | --                      |

Abdulqayyim Elgazar- TA 4-HNMR-DMSO-AF.10.fid  
Abdulqayyim Elgazar- TA 4-HNMR-DMSO-AF

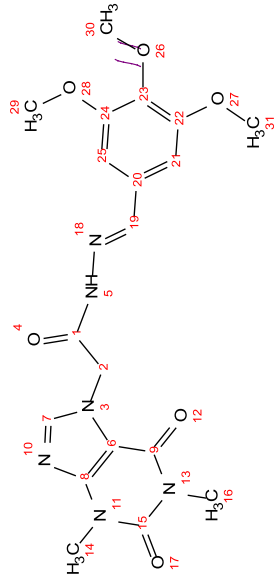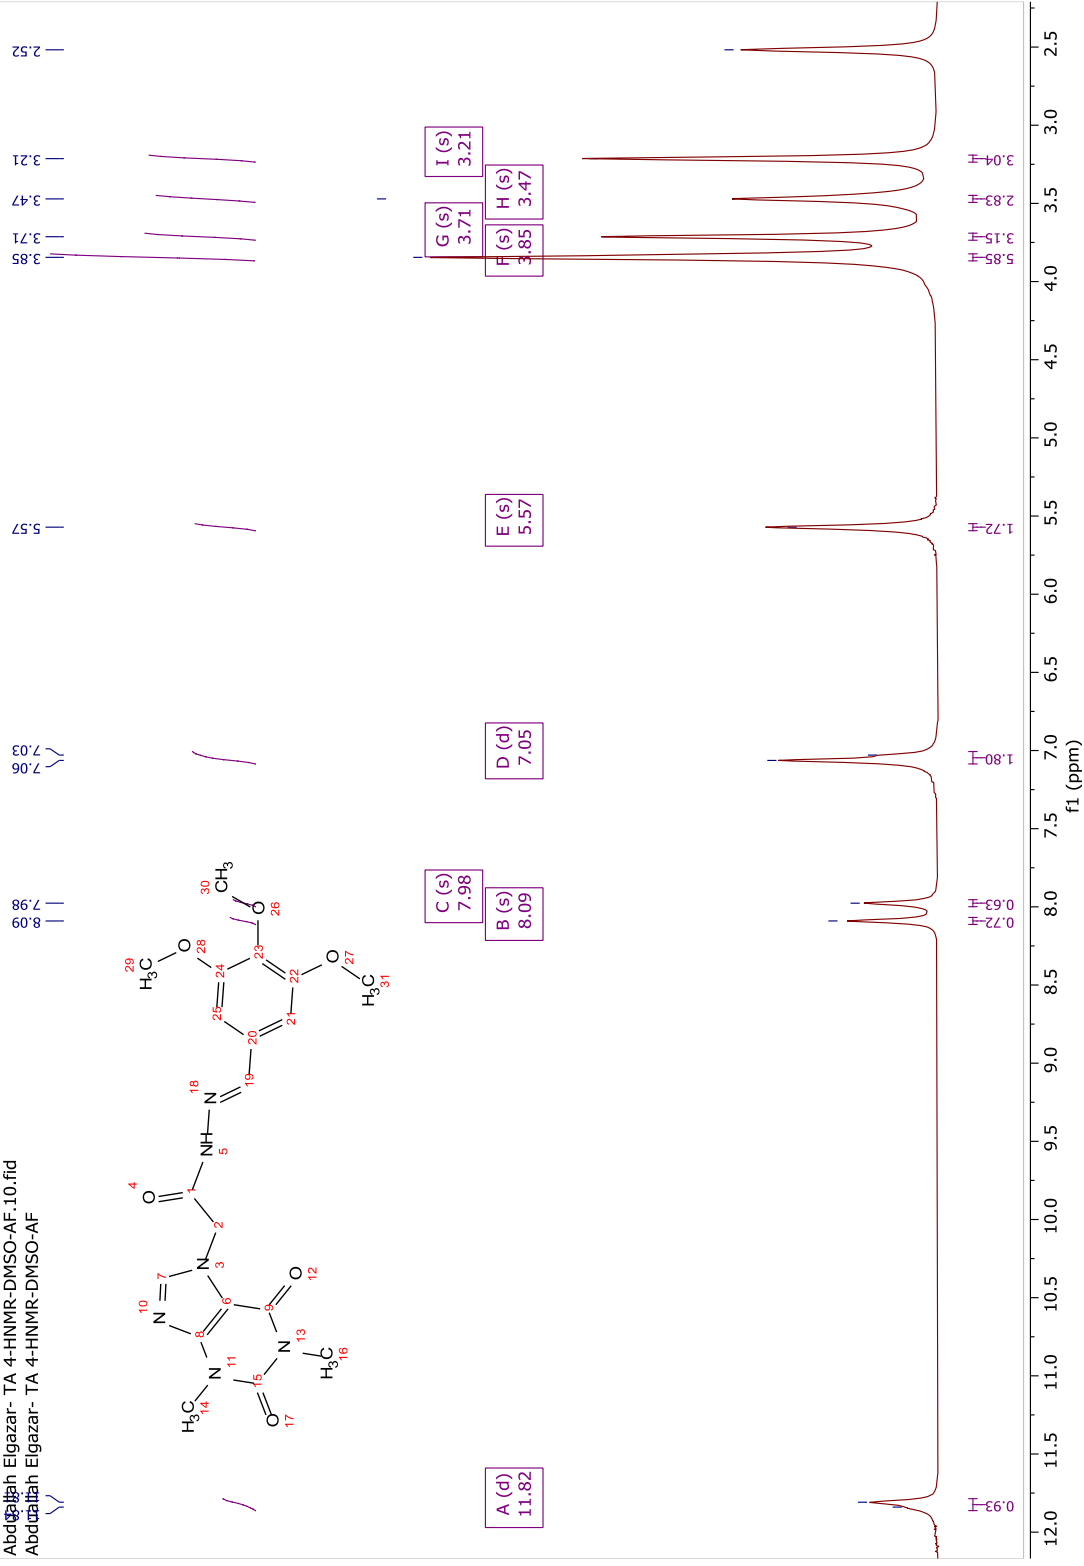

H NMR spectrum of compound 18e

Abduallah Elgazar- TA 4-CNMR-DMSO-AE310.fid  
Abduallah Elgazar- TA 4-CNMR-DMSO-AE31

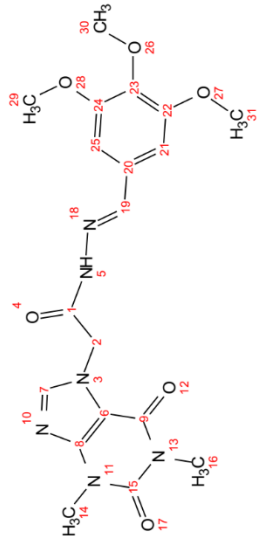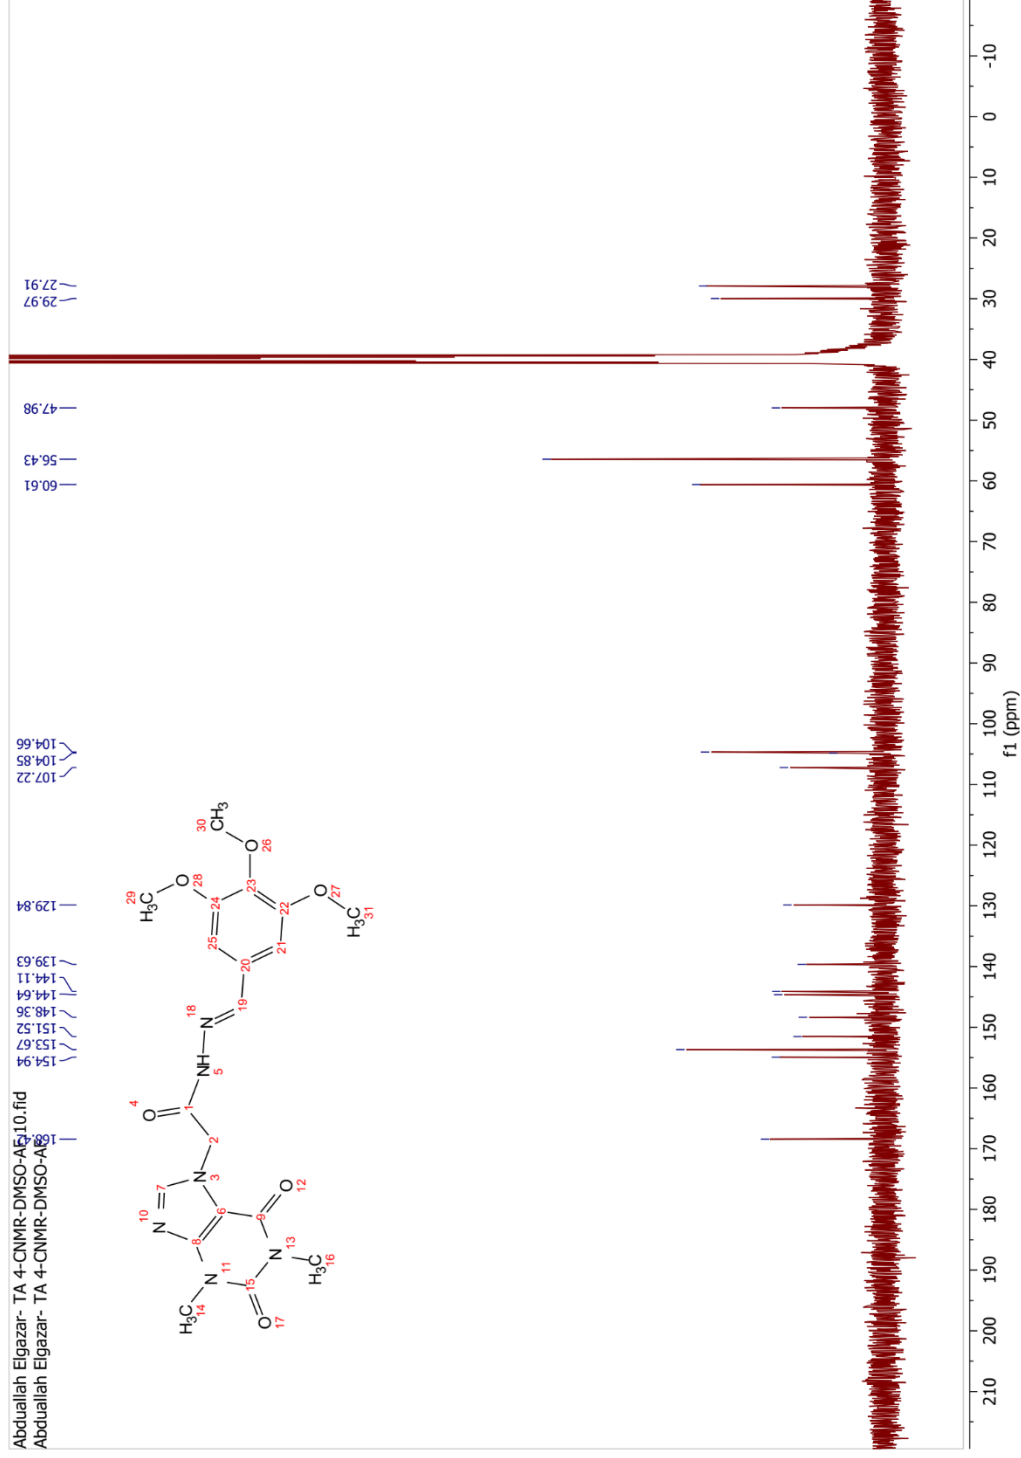

**<sup>13</sup>C NMR spectrum of compound 18e**

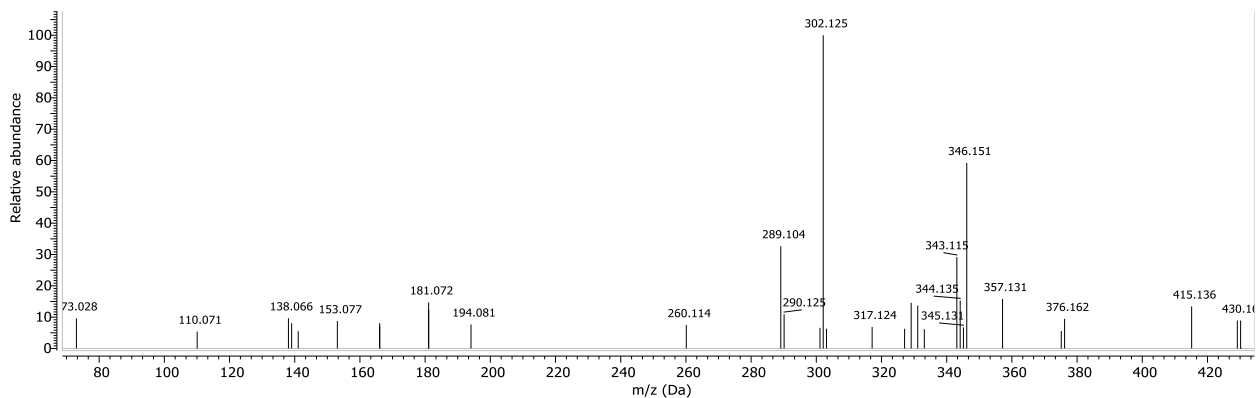

**Mass spectrum of compound 18e**

**Table.s21 NMR assignment of acefylline-hydrazone 3 -methoxy benzaldehyde hybrid 18f**

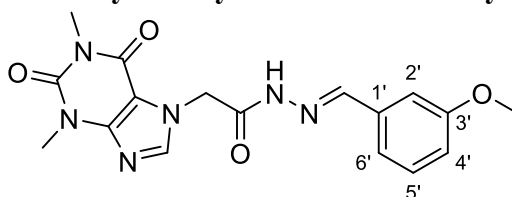

| Parent compound    |                             |                             | Hybrid compound |                             |                         |
|--------------------|-----------------------------|-----------------------------|-----------------|-----------------------------|-------------------------|
| Atom<br>C/H        | <sup>1</sup> H(δ,ppm)(J,Hz) | <sup>13</sup> C<br>(δ, ppm) | DEPT            | <sup>1</sup> H(δ,ppm)(J,Hz) | <sup>13</sup> C(δ, ppm) |
| COOH               | --                          | 169.48                      | C               | --                          | 168.42                  |
| 1                  | -                           | 154.3                       | C               | --                          | 154.94                  |
| 5'                 | 7.44                        | 130.05                      | CH              | 7.17 – 7.00 (m, 1H)         | 153.67                  |
| 3'                 | --                          | 160.15                      | C               | ---                         | 153.67                  |
| 2                  | --                          | 151.13                      | C               | --                          | 151.52                  |
| 3                  | --                          | 148.36                      | C               | --                          | 148.36                  |
| 4'                 | 7.18                        | 121.25                      | CH              | 7.17 – 7.00 (m, 1H)         | 144.64                  |
| CH=N               | 10.6                        | 191.26                      | CH              | 8.15 (s, 1H)                | 144.11                  |
| 4                  | 8.04                        | 143.63                      | CH              | 8.10 (s, 1H)                | 139.63                  |
| 1'                 | --                          | 137.79                      | C               | --                          | 129.84                  |
| 5                  | --                          | 106.83                      | C               | --                          | 107.22                  |
| 2'                 | 7.37                        | 112.05                      | CH              | 7.98 (s, 1H)                | 104.85                  |
| 6'                 | 7.44                        | 123.57                      | CH              | 7.17 – 7.00 (m, 1H)         | 104.66                  |
| OCH3               | 3.93                        | 60.93                       | CH <sub>3</sub> | 3.79 (d, J = 53.2 Hz, 3H)   | 56.43                   |
| CH <sub>2</sub> CO | 5.07                        | 47.6                        | CH <sub>2</sub> | 5.58 (s, 2H)                | 47.98                   |
| 6                  | 3.44                        | 29.92                       | CH <sub>3</sub> | 3.79 (d, J = 53.2 Hz, 3H)   | 29.97                   |
| 7                  | 3.20                        | 27.9                        | CH <sub>3</sub> | 3.22 (s, 3H)                | 27.91                   |
| NH                 | 11                          | --                          | NH              | 11.82 (d, J = 12.5 Hz, 1H)  | --                      |

Abduallah Elgazar- TA 5-HNMR-DMSO-AF.10.fid  
Abduallah Elgazar- TA 5-HNMR-DMSO-AF

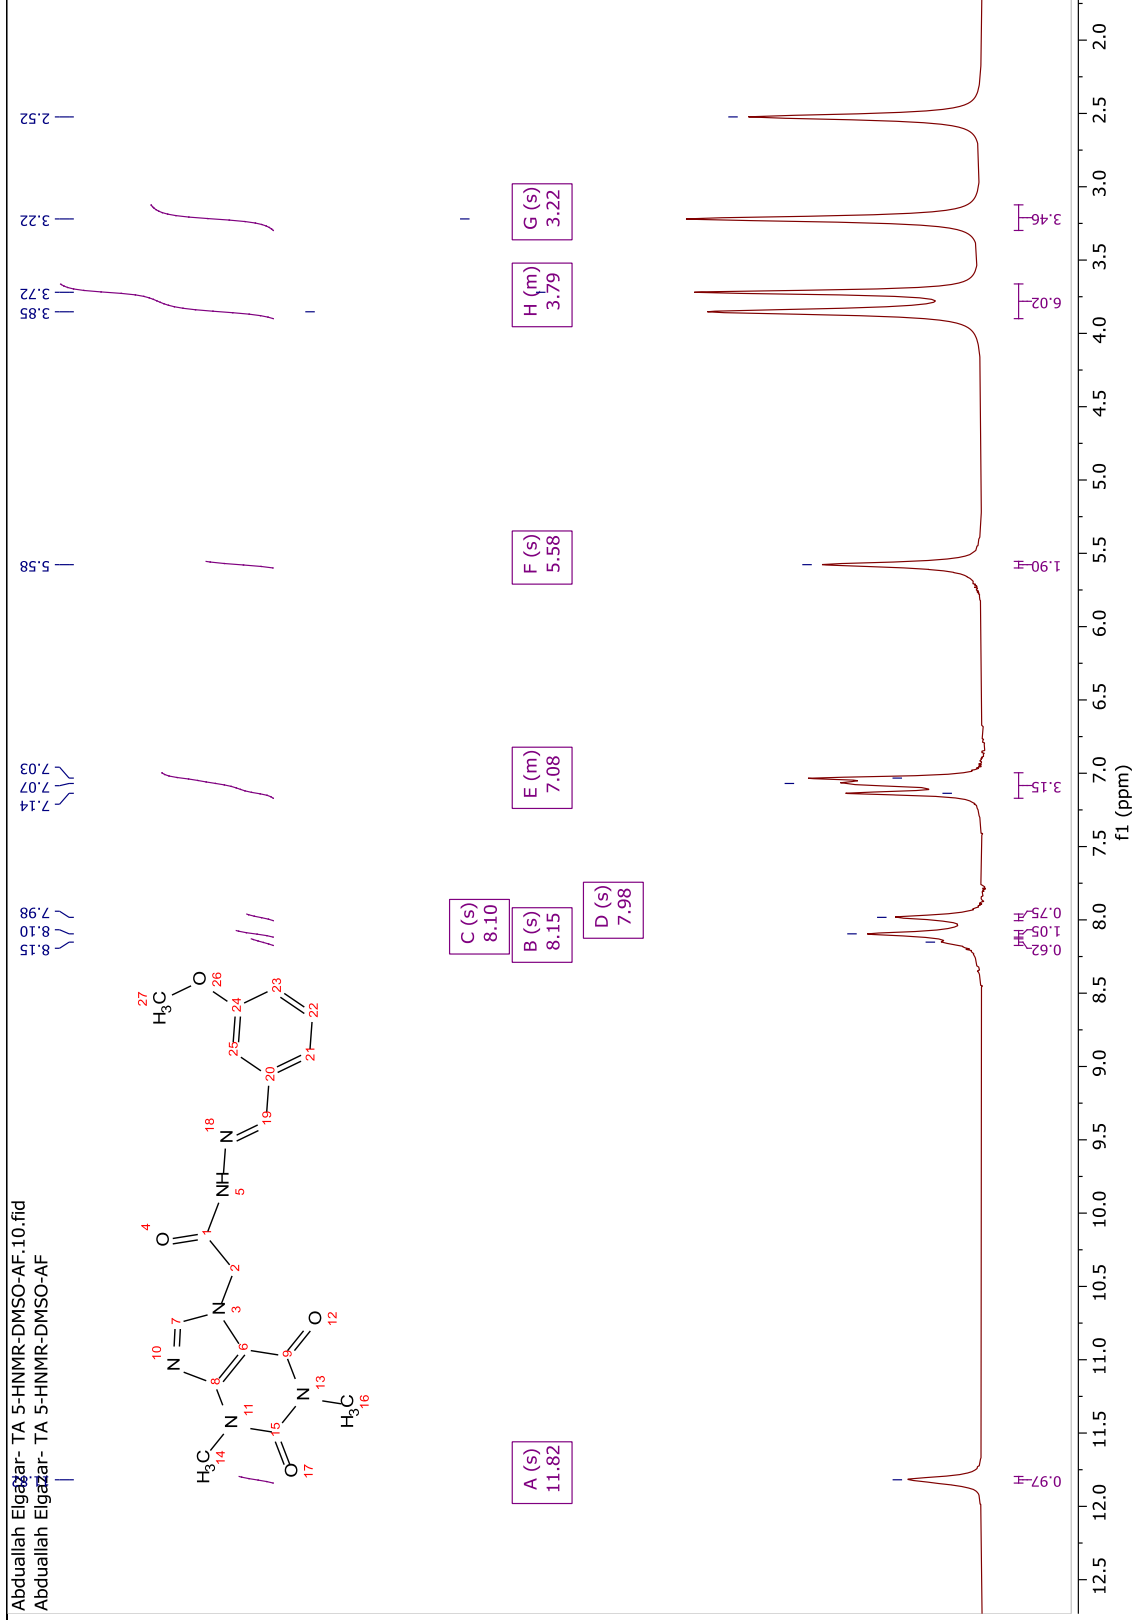

<sup>1</sup>H NMR spectrum of compound 18f



Abduallah Elgazar- TA 5-CNMR-DMSO-AE-10.fid  
Abduallah Elgazar- TA 5-CNMR-DMSO-AE-10

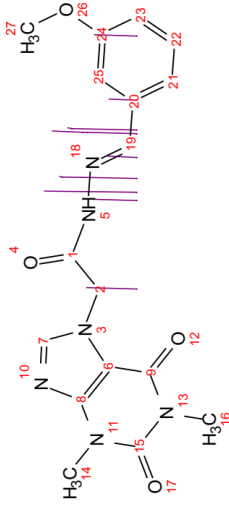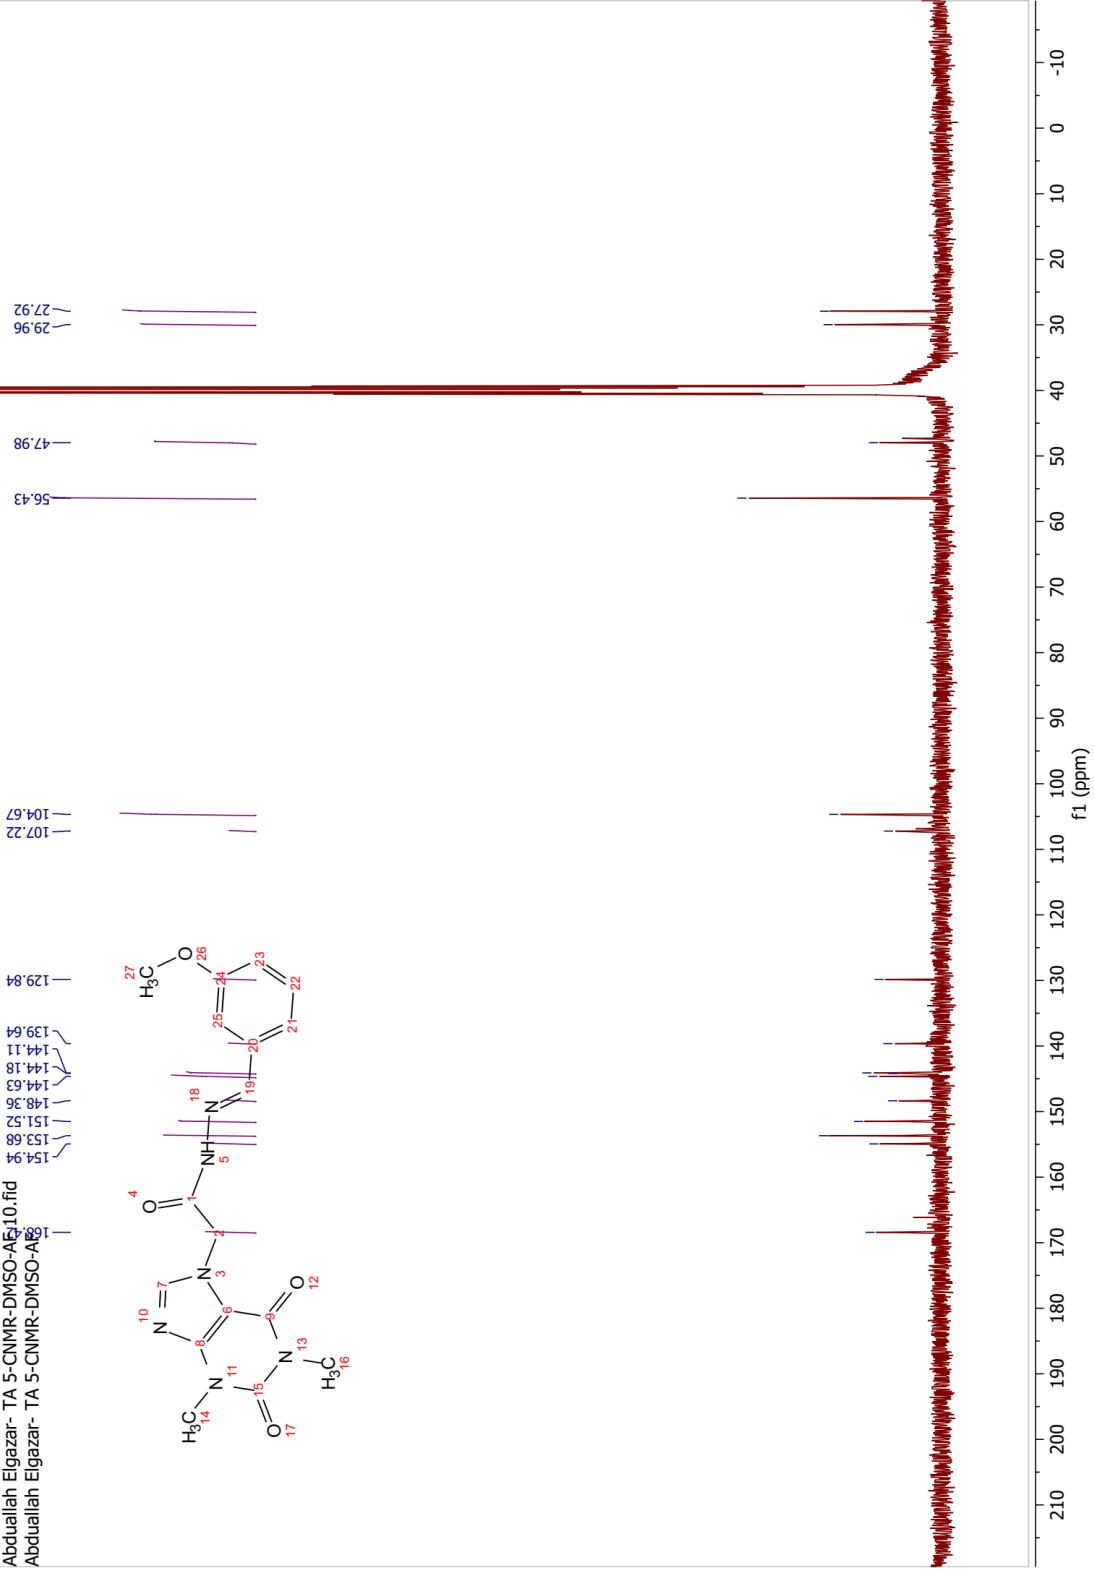

**<sup>13</sup>C NMR spectrum of compound 18f**

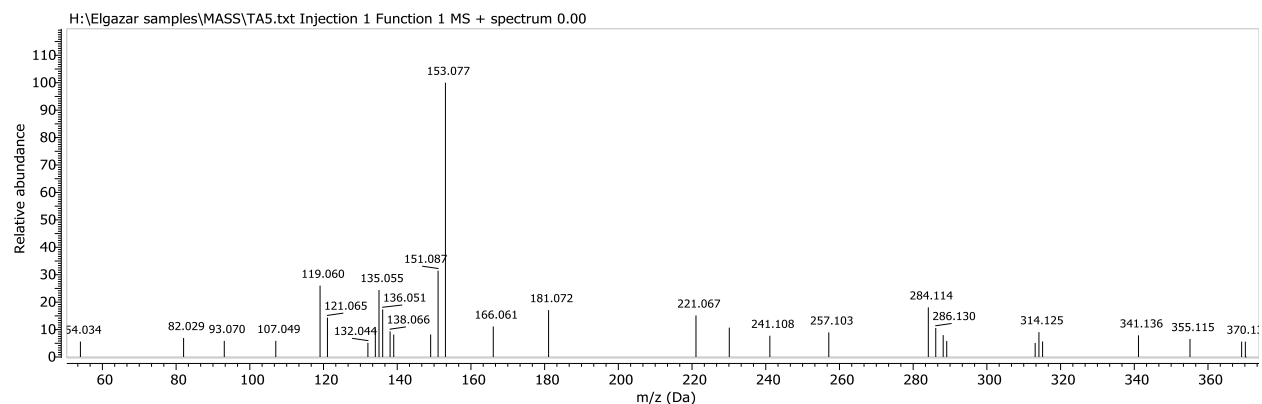

**Mass spectrum of compound 18f**

**Table.s22 NMR assignment of ACEFYLLINE-hydrazone 2 -hydroxy benzaldehyde hybrid 18g**

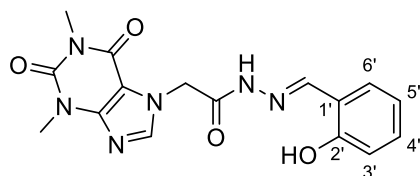

| C/H                | Parent compound |                             |                         | Hybrid compound |                                |                         |
|--------------------|-----------------|-----------------------------|-------------------------|-----------------|--------------------------------|-------------------------|
|                    | Atom            | <sup>1</sup> H(δ,ppm)(J,Hz) | <sup>13</sup> C(δ, ppm) | DEPT            | <sup>1</sup> H(δ,ppm)(J,Hz)    | <sup>13</sup> C(δ, ppm) |
| COOH               |                 | --                          | 169.48                  | C               | --                             | 168.11                  |
| 2'                 |                 | --                          | 162                     | C               | --                             | 156.92                  |
| 1                  |                 | -                           | 154.3                   | C               | --                             | 154.95                  |
| 2                  |                 | --                          | 151.13                  | C               | --                             | 151.51                  |
| 3                  |                 | --                          | 148.36                  | C               | --                             | 148.32                  |
| CH=N               |                 | 10.6                        | 191.26                  | CH              | 8.37 (s, 1H)                   | 144.13                  |
| 4                  |                 | 8.04                        | 143.63                  | CH              | 8.07 (s, 1H)                   | 141.92                  |
| 4'                 |                 | 6.9                         | 136.68                  | CH              | 7.77 (dd, J = 7.9, 1.7 Hz, 1H) | 131.86                  |
| 6'                 |                 | 6.7                         | 133.69                  | CH              | 7.35 – 7.23 (m, 1H)            | 129.48                  |
| 1'                 |                 | --                          | 120.926                 | C               | --                             | 126.47                  |
| 5'                 |                 | 6.45                        | 120.5                   | CH              | 6.96 – 6.84 (m, 1H)            | 119.89                  |
| 3'                 |                 | 6.69                        | 117.69                  | CH              | 6.96 – 6.84 (m, 1H)            | 116.66                  |
| 5                  |                 | --                          | 106.83                  | C               | --                             | 107.19                  |
| CH <sub>2</sub> CO |                 | 5.07                        | 47.6                    | CH <sub>2</sub> | 5.54 (s, 2H)                   | 47.84                   |
| 6                  |                 | 3.44                        | 29.92                   | CH <sub>3</sub> | 3.47 (s, 3H)                   | 29.95                   |
| 7                  |                 | 3.20                        | 27.9                    | CH <sub>3</sub> | 3.21 (s, 3H)                   | 27.91                   |
| OH                 |                 | 9.1                         | --                      | --              | 10.11                          | --                      |
| NH                 |                 | 11                          | --                      | NH              | 11.71 (s, 1H)                  | --                      |

Abduallah Elgazar- TA.β-HNMR-DMSO-AF.10.fid  
 Abduallah Elgazar- TA.β-HNMR-DMSO-AF

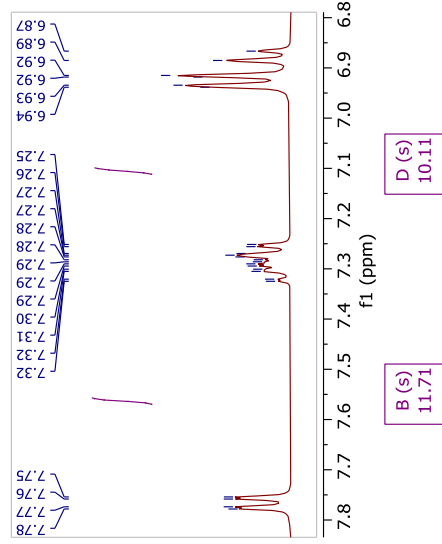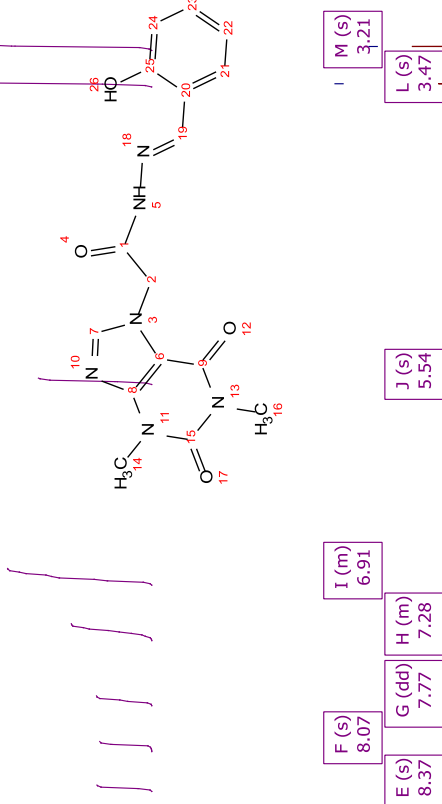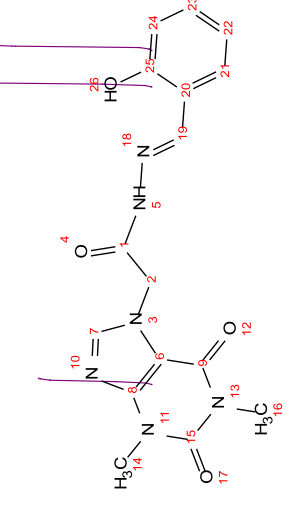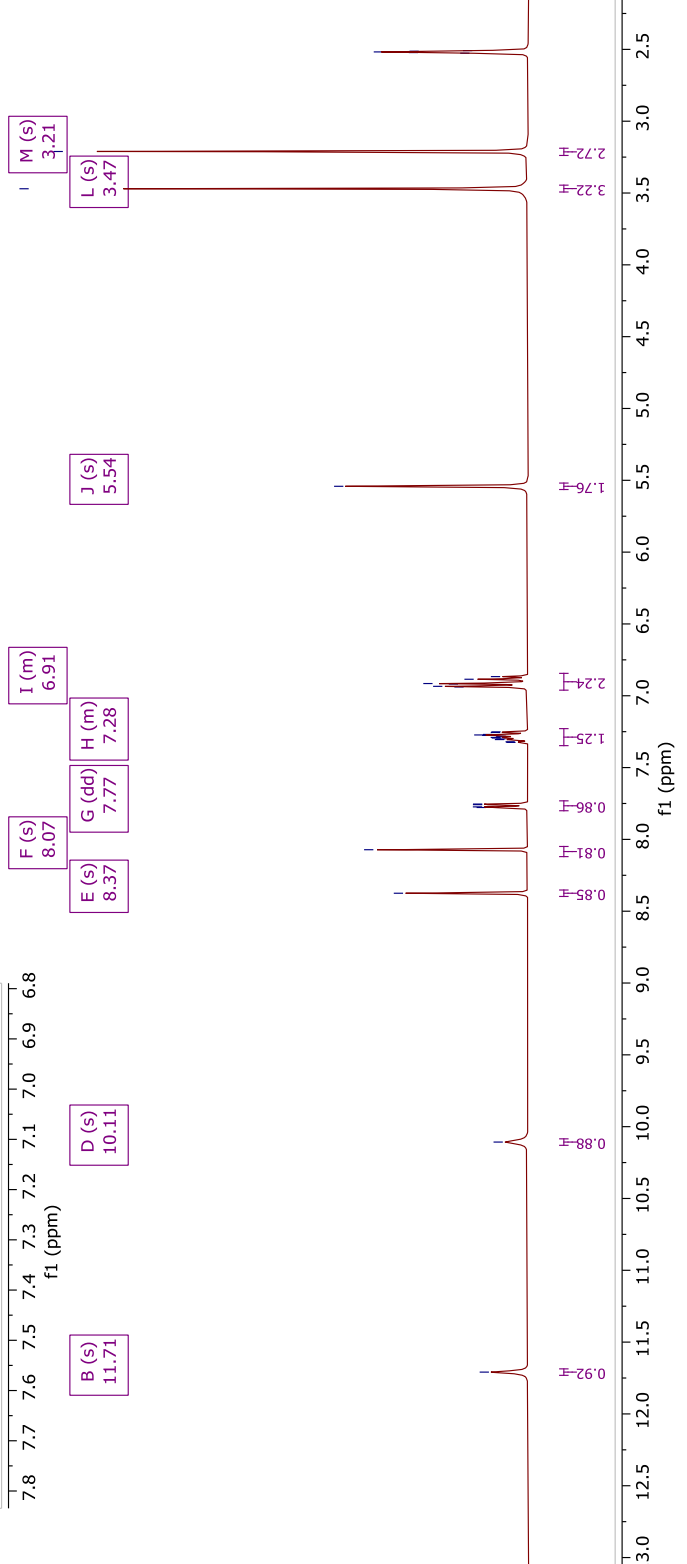

**<sup>1</sup>H NMR spectrum of compound 18g**

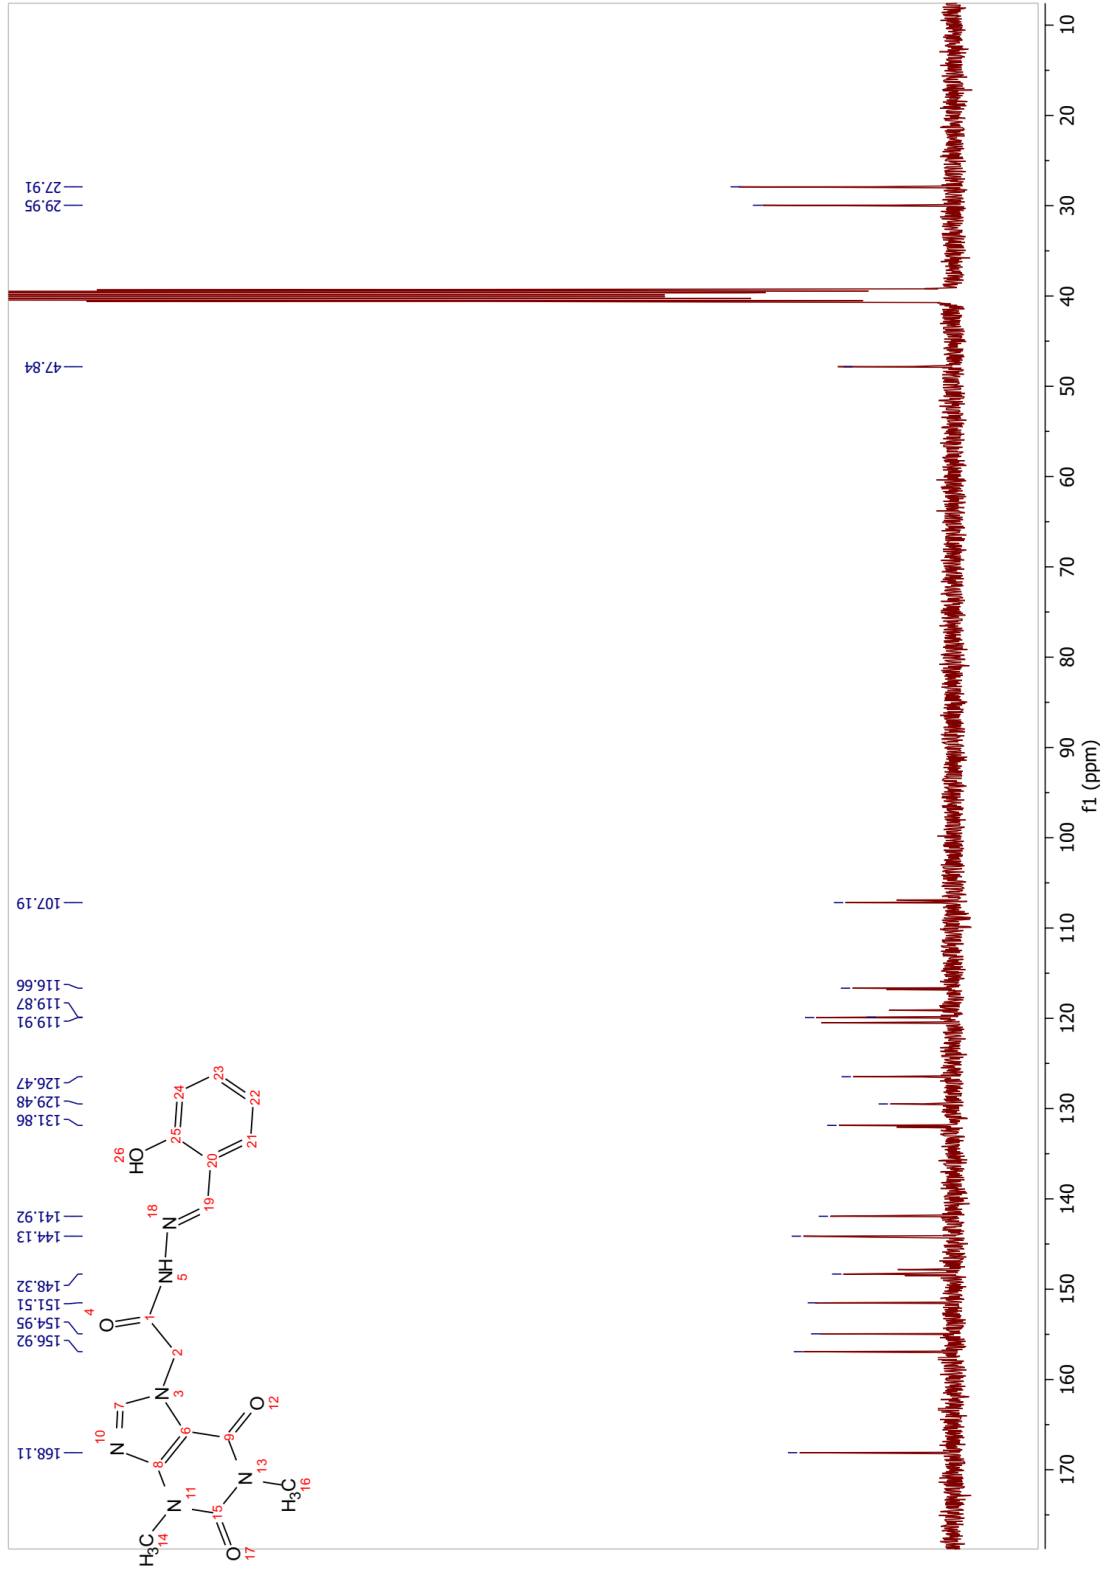

**<sup>13</sup>C NMR spectrum of compound 18g**

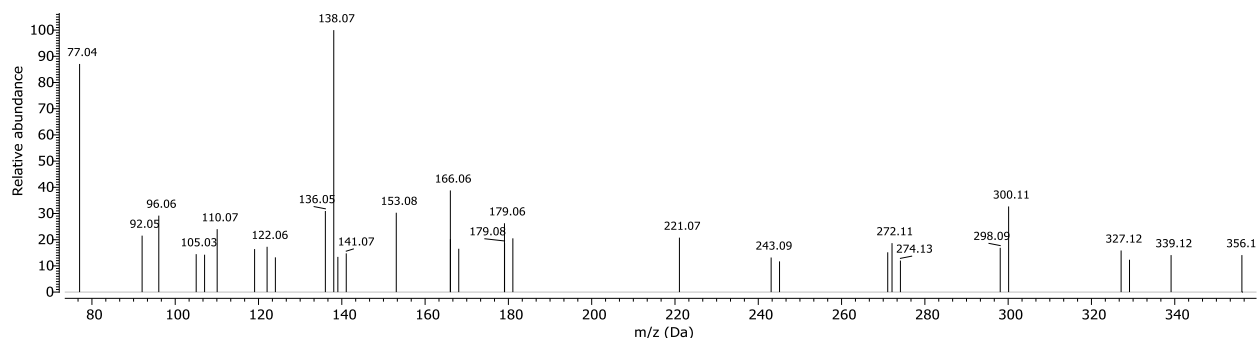

**Mass spectrum of compound 18g**

**Table.s23 NMR assignment of acefylline-hydrazone piperonal hybrid 18h**

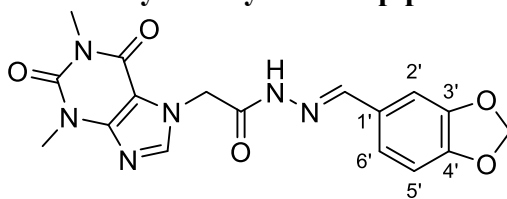

| Parent compound      |                             |                         | Hybrid compound |                             |                                 |
|----------------------|-----------------------------|-------------------------|-----------------|-----------------------------|---------------------------------|
| C/H Atom             | <sup>1</sup> H(δ,ppm)(J,Hz) | <sup>13</sup> C(δ, ppm) | DEPT            | <sup>1</sup> H(δ,ppm)(J,Hz) | <sup>13</sup> C(δ, ppm)         |
| COOH                 | --                          | 169.48                  | C               | 168.28                      | --                              |
| 1                    | -                           | 154.3                   | C               | 154.93                      | --                              |
| 4'                   | --                          | 153.1                   | CH              | 151.51                      | --                              |
| 2                    | --                          | 151.13                  | C               | 149.54                      | --                              |
| 3'                   | --                          | 148.7                   | CH              | 148.49                      | 7.00 (d, <i>J</i> = 8.0 Hz, 1H) |
| 3                    | --                          | 148.36                  | C               | 148.33                      | --                              |
| CH=N                 | 10.6                        | 191.26                  | CH              | 144.45                      | 8.07 (s, 1H)                    |
| 4                    | 8.04                        | 143.63                  | CH              | 144.10                      | 7.96 (s, 1H)                    |
| 1'                   | --                          | 131.9                   | C               | 128.79                      | --                              |
| 5'                   | 6.92                        | 128.6                   | CH              | 123.75                      | --                              |
| 6'                   | 7.23                        | 108.3                   | CH              | 108.92                      | 7.37 (s, 1H)                    |
| 2'                   | 7.2                         | 106.9                   | CH              | 107.21                      | 7.17 (d, <i>J</i> = 8.1 Hz, 1H) |
| 5                    | --                          | 106.83                  | C               | 105.50                      | --                              |
| O-CH <sub>2</sub> -O | 6.06                        | 102.1                   | CH <sub>2</sub> | 102.05                      | 6.10 (s, 2H)                    |
| CH <sub>2</sub> CO   | 5.07                        | 47.6                    | CH <sub>2</sub> | 47.91                       | 5.54 (s, 2H)                    |
| 6                    | 3.44                        | 29.92                   | CH <sub>3</sub> | 29.95                       | 3.47 (s, 3H)                    |
| 7                    | 3.20                        | 27.9                    | CH <sub>3</sub> | 27.91                       | 3.21 (s, 3H)                    |
| NH                   | 11                          | --                      | NH              | --                          | 11.68 (s, 1H)                   |

Abduallah Elgazar- TA 7ZHNMR-DMSO-AF-10.fid  
Abduallah Elgazar- TA 7ZHNMR-DMSO-AF

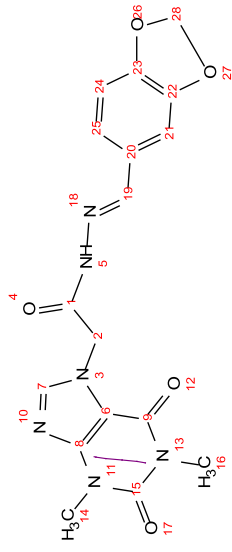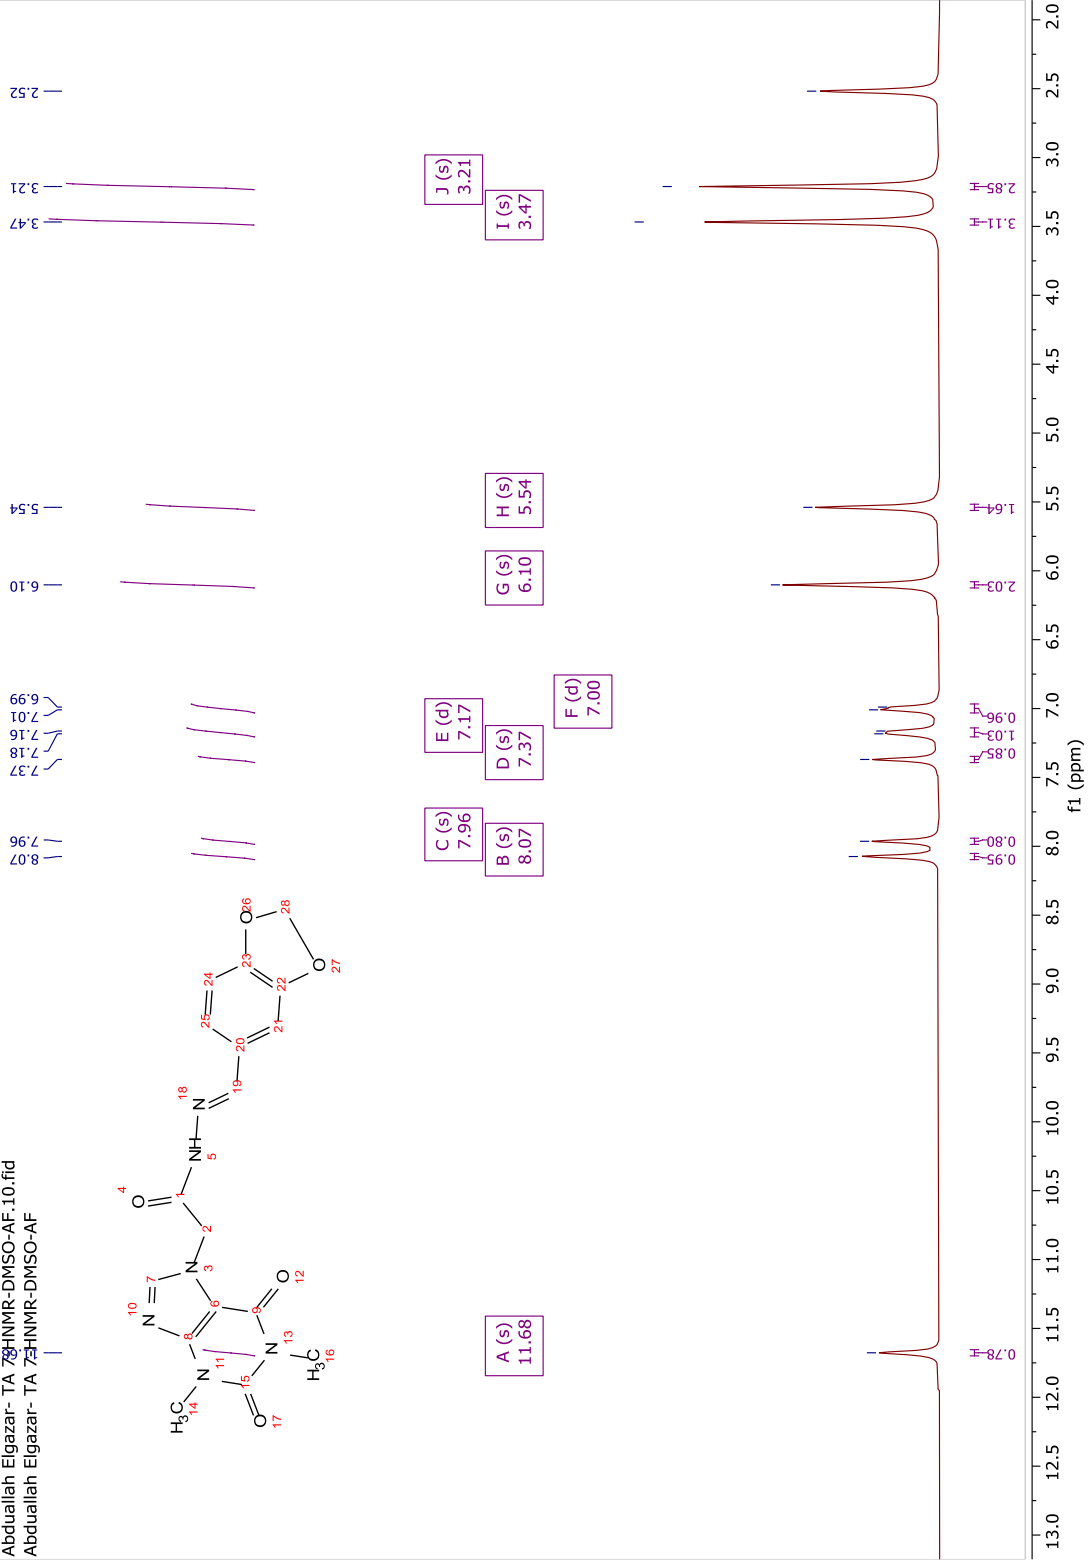

<sup>1</sup>H NMR spectrum of compound 18h

### <sup>13</sup>C NMR spectrum of compound 18h

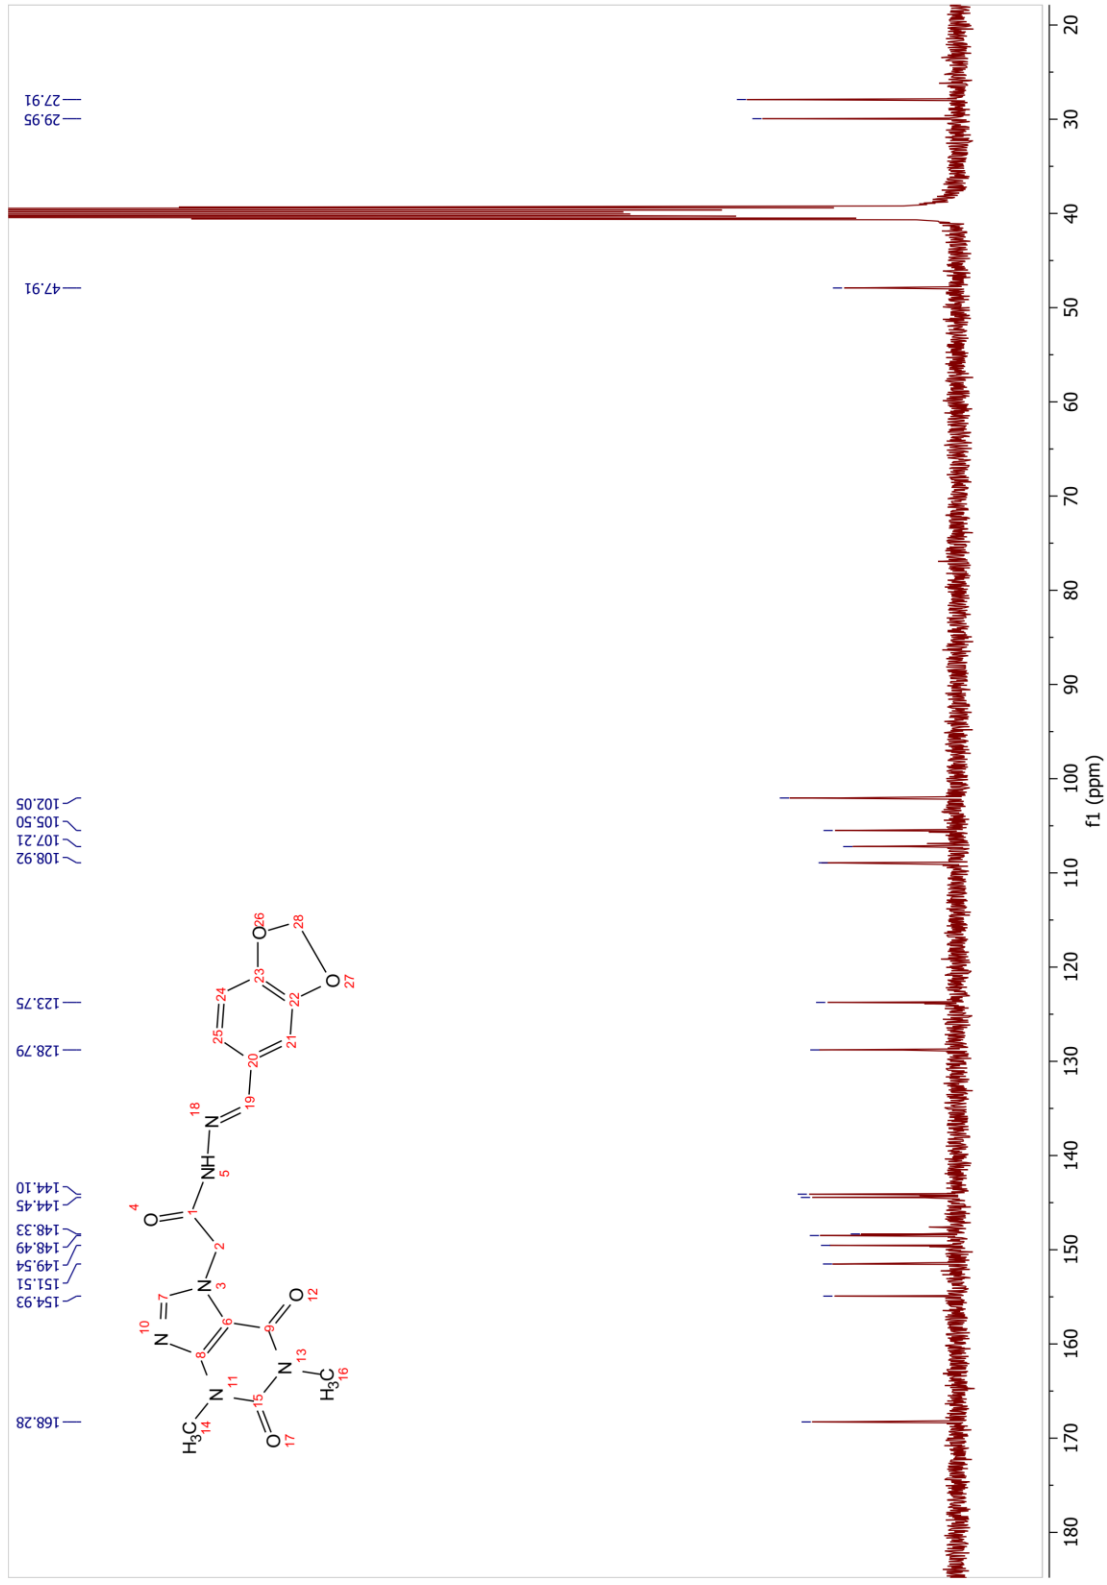

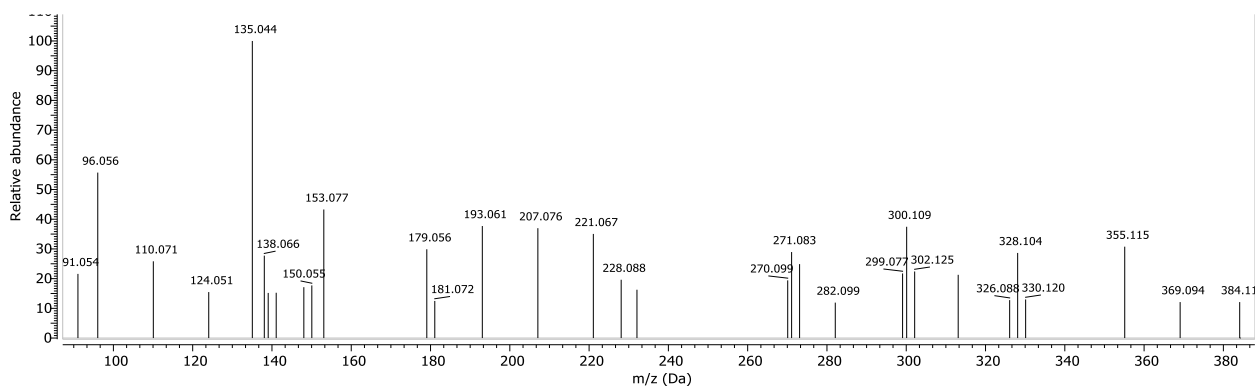

**Mass spectrum of compound 18h**

**Table.s24 NMR assignment of acefylline-hydrazone isovanillin hybrid 18i.**

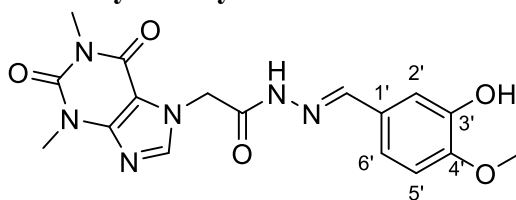

| Parent compound    |                             |                         | Hybrid compound   |                                |                         |
|--------------------|-----------------------------|-------------------------|-------------------|--------------------------------|-------------------------|
| Atom C/H           | <sup>1</sup> H(δ,ppm)(J,Hz) | <sup>13</sup> C(δ, ppm) | DEPT              | <sup>1</sup> H(δ,ppm)(J,Hz)    | <sup>13</sup> C(δ, ppm) |
| OH                 | 9                           | --                      | OH                | 9.30 (s, 1H)                   | --                      |
| CH=N               | 10.6                        | 191.26                  | CH                | 8.07 (s, 1H)                   | 144.18                  |
| 4                  | 8.04                        | 143.63                  | CH                | 7.92 (s, 1H)                   | 145.05                  |
| 2'                 | 7.3 d(J=1.50)               | 109.14                  | CH                | 7.24 (t, J = 3.0 Hz, 1H)       | 112.30                  |
| 5'                 | 7.2                         | 114.75                  | CH                | 7.11 – 7.04 (m, 1H)            | 112.61                  |
| 6'                 | 6.9 d(J=7.5)                | 127.49                  | CH                | 6.98 (dd, J = 8.4, 4.9 Hz, 1H) | 120.65                  |
| CH <sub>2</sub> CO | 5.07                        | 47.6                    | CH <sub>2</sub>   | 5.53 (s, 2H)                   | 47.78                   |
| OCH <sub>3</sub>   | 3.8                         | 56                      | CH <sub>3</sub> - | 3.82 (d, J = 5.2 Hz, 3H)       | 56.07                   |
| 6                  | 3.44                        | 29.92                   | CH <sub>3</sub>   | 3.47 (s, 3H)                   | 29.95                   |
| 7                  | 3.20                        | 27.9                    | CH <sub>3</sub>   | 3.21 (s, 3H)                   | 27.91                   |
| NH                 | 11                          | --                      | NH                | 11.61 (s, 1H)                  | --                      |
| COOH               | --                          | 169.48                  | C                 | --                             | 168.04                  |
| 1                  | -                           | 154.3                   | C                 | --                             | 154.96                  |
| 3'                 | --                          | 152.14                  | C                 | --                             | 151.52                  |
| 2                  | --                          | 151.13                  | C                 | --                             | 150.26                  |
| 3                  | --                          | 148.36                  | C                 | --                             | 148.33                  |
| 4'                 | --                          | 147.5                   | C                 | --                             | 147.30                  |
| 1'                 | --                          | 129.77                  | C                 | --                             | 127.15                  |
| 5                  | --                          | 106.83                  | C                 | --                             | 107.18                  |



Abduallah Elgazar- TA 8-HNMR-DMSO-AF.10.fid  
Abduallah Elgazar- TA 8-HNMR-DMSO-AF

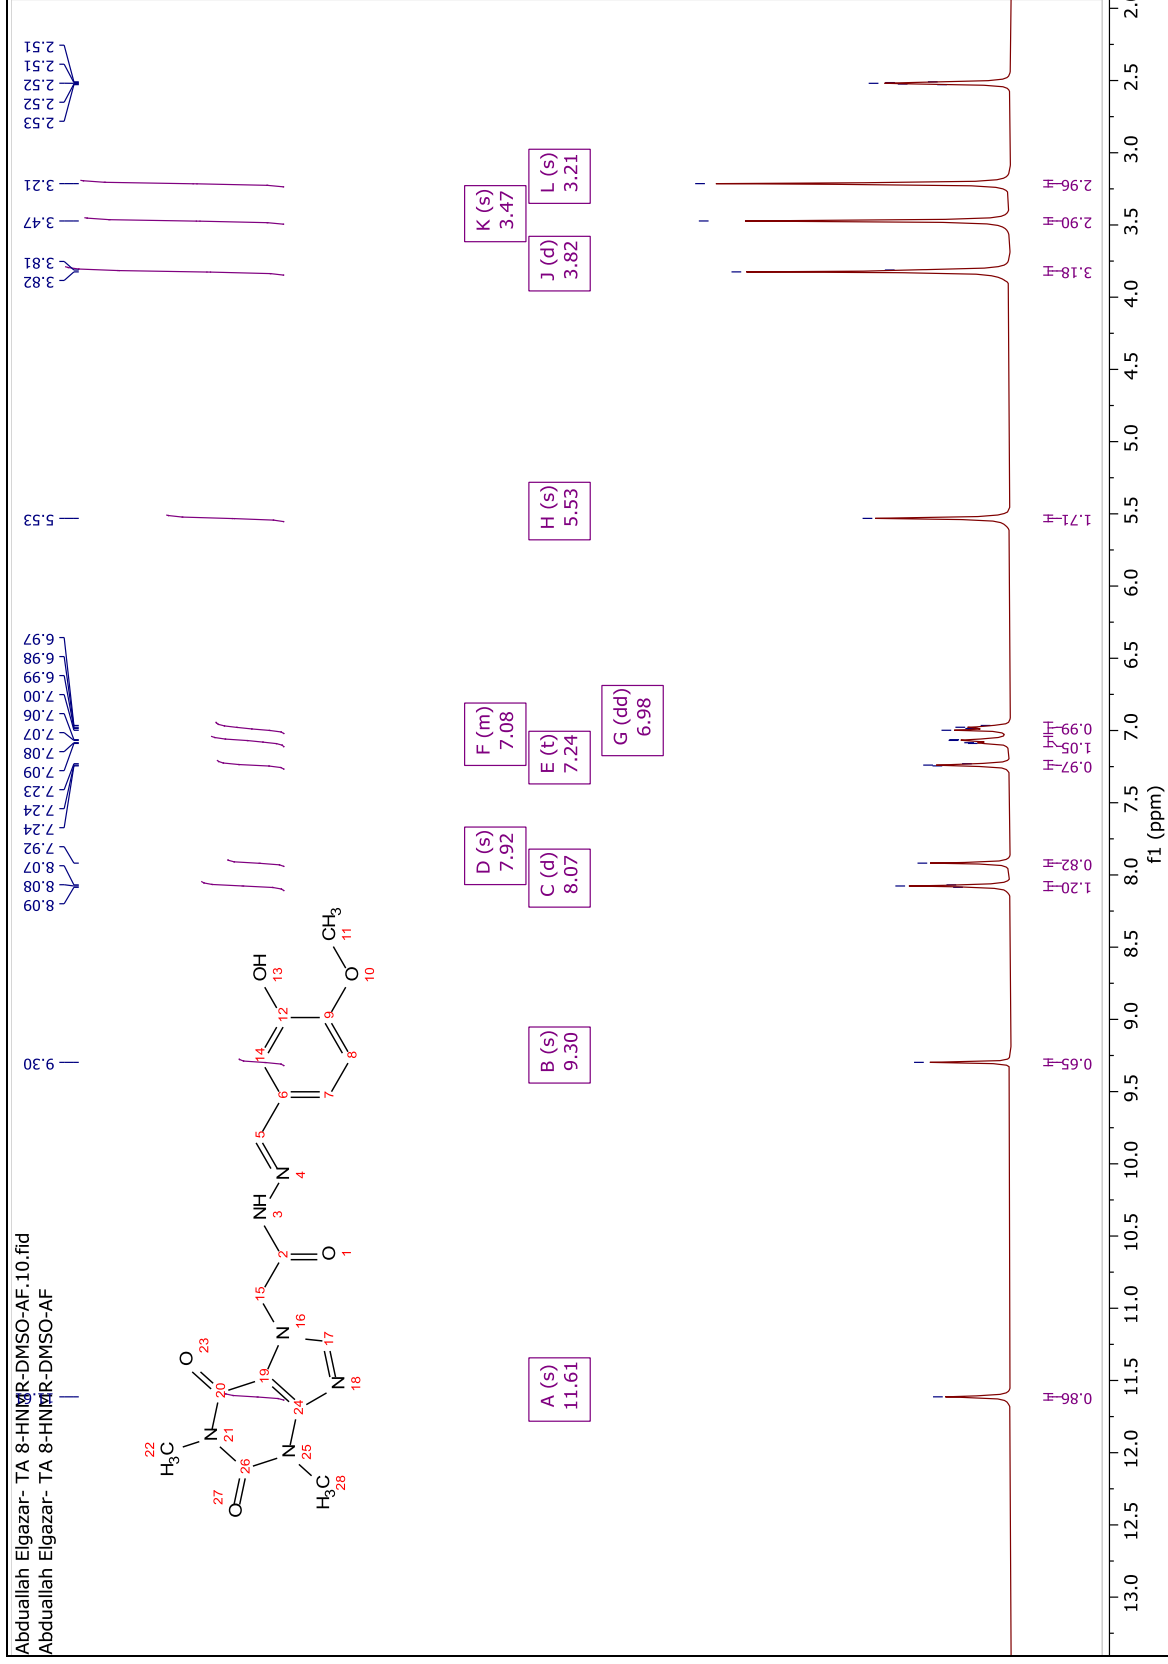

<sup>1</sup>H NMR spectrum of compound 18i

Abdullah Elgazar- TA 8-13 NMR DMSO-d6 10.fid

Abdullah Elgazar- TA 8-13 NMR DMSO-d6

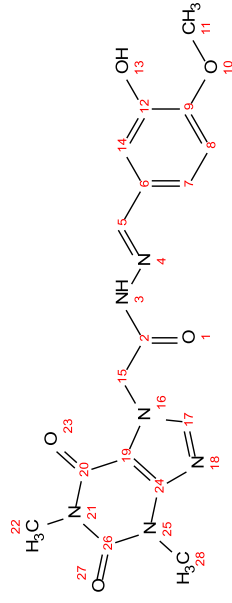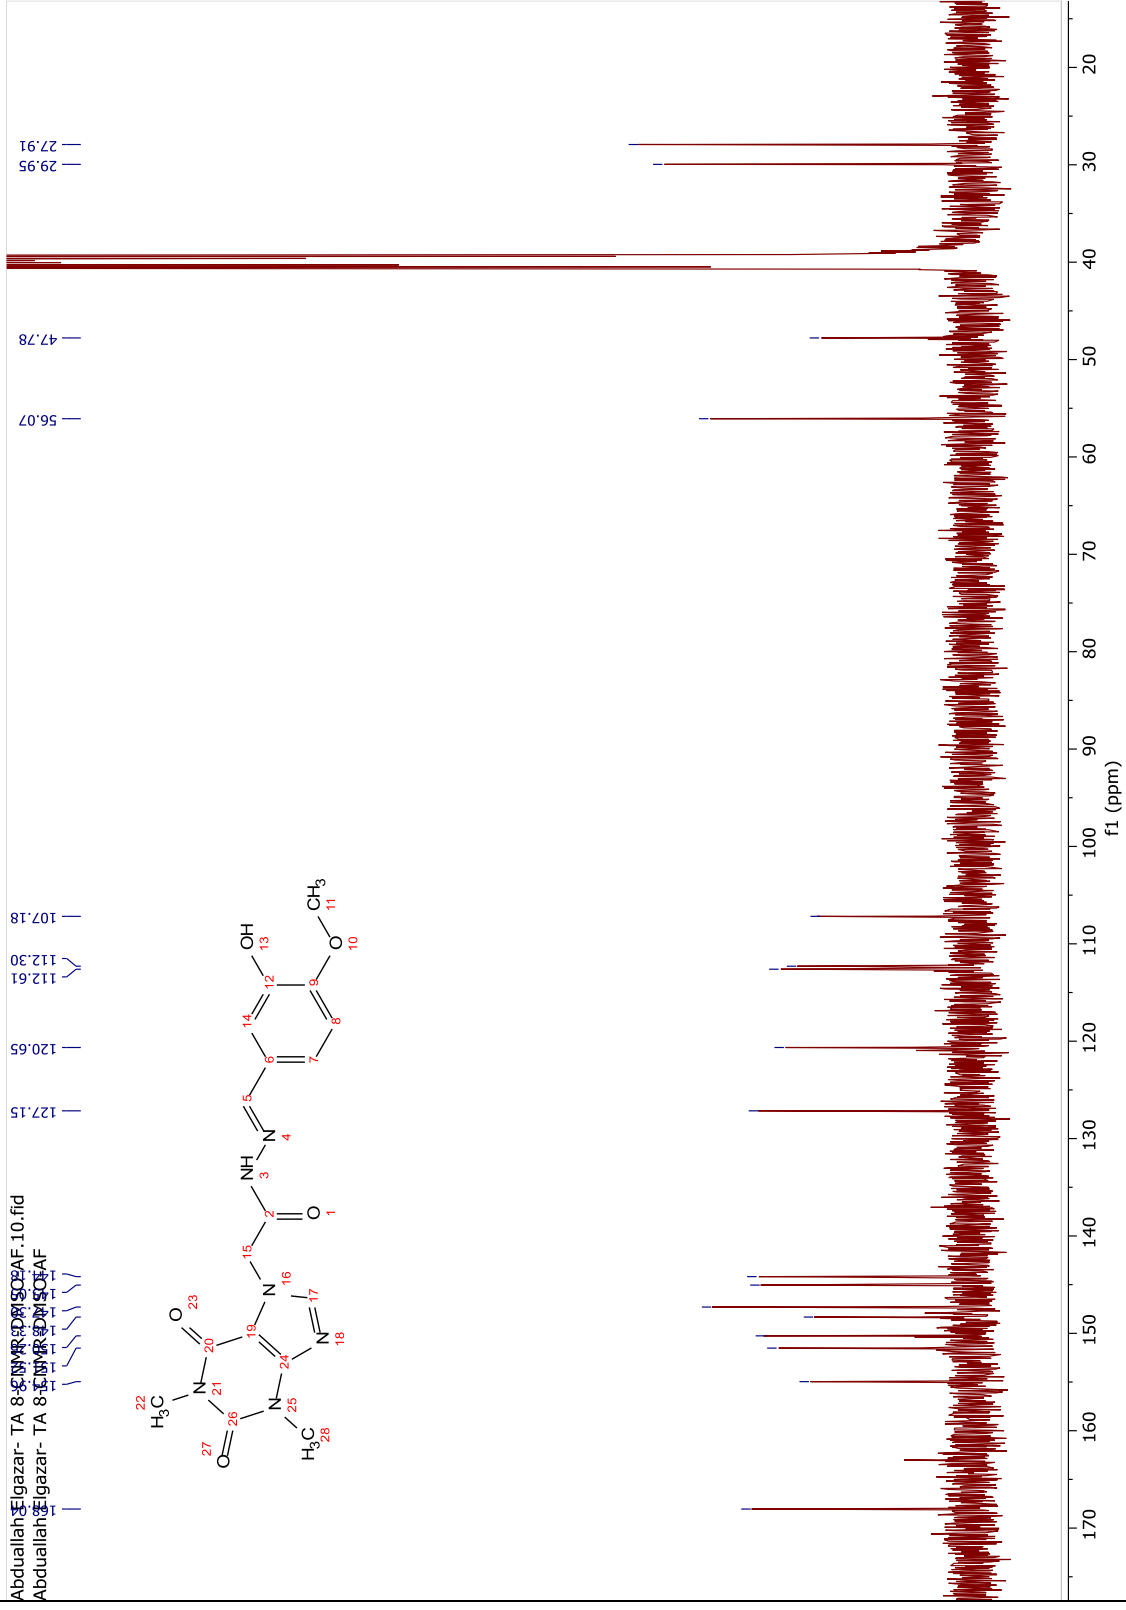

**<sup>13</sup>C NMR spectrum of compound 18i**

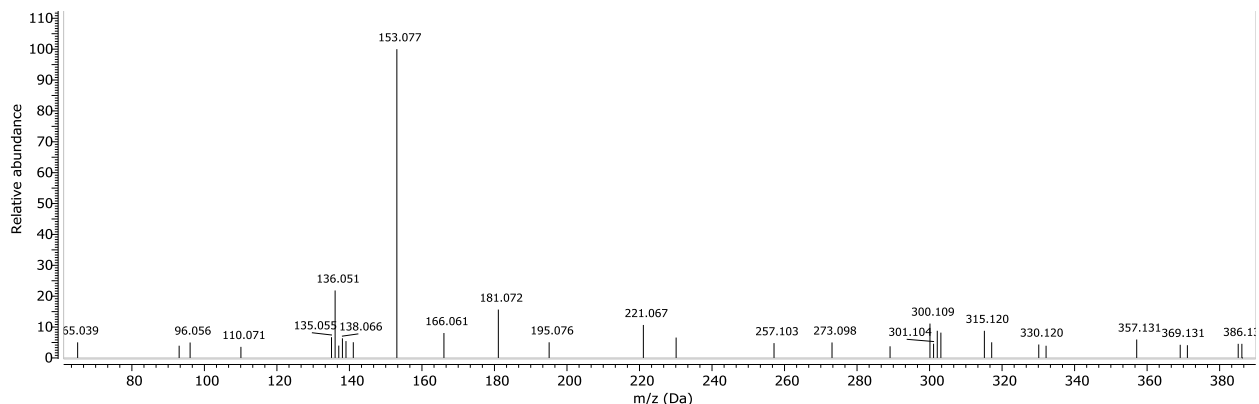

**Mass spectrum of compound 18i**

**Table.s25 NMR assignment of acefylline-hydrazone vanillin hybrid 18j**

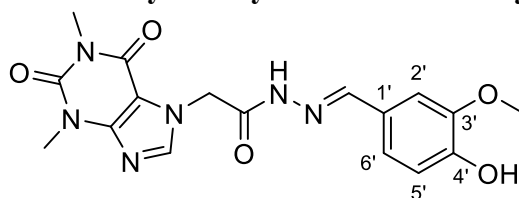

| Parent compound    |                             |                          | Hybrid compound |                                       |                         |
|--------------------|-----------------------------|--------------------------|-----------------|---------------------------------------|-------------------------|
| C/H Atom           | <sup>1</sup> H(δ,ppm)(J,Hz) | <sup>13</sup> C (δ, ppm) | DEPT            | <sup>1</sup> H(δ,ppm)(J,Hz)           | <sup>13</sup> C(δ, ppm) |
| OH                 | 9                           | --                       | OH              | 9.58 (s, 1H)                          | --                      |
| CH=N               | 10.6                        | 191.26                   | CH              | 8.08 (d, <i>J</i> = 2.2 Hz, 1H)       | 144.13                  |
| 4                  | 8.04                        | 143.63                   | CH              | 7.94 (s, 1H)                          | 145.17                  |
| 2'                 | 7.3 d( <i>J</i> =1.50)      | 109.14                   | CH              | 7.35 – 7.26 (m, 1H)                   | 109.87                  |
| 5'                 | 7.2                         | 114.75                   | CH              | 7.11 (td, <i>J</i> = 8.9, 1.9 Hz, 1H) | 115.98                  |
| 6'                 | 6.9 d( <i>J</i> =7.5)       | 127.49                   | CH              | 6.84 (dd, <i>J</i> = 8.1, 3.4 Hz, 1H) | 121.96                  |
| CH <sub>2</sub> CO | 5.07                        | 47.6                     | CH <sub>2</sub> | 5.54 (s, 2H)                          | 47.93                   |
| OCH <sub>3</sub>   | 3.8                         | 56                       | CH <sub>3</sub> | 3.84 (s, 3H)                          | 56.05                   |
| 6                  | 3.44                        | 29.92                    | CH <sub>3</sub> | 3.47 (s, 3H)                          | 29.96                   |
| 7                  | 3.20                        | 27.9                     | CH <sub>3</sub> | 3.21 (s, 3H)                          | 27.91                   |
| NH                 | 11                          | --                       | NH              | 11.61 (s, 1H)                         | --                      |
| COOH               | --                          | 169.48                   | C               | --                                    | 168.08                  |
| 4'                 | --                          | 152.14                   | C               | --                                    | 151.52                  |
| 2                  | --                          | 151.13                   | C               | --                                    | 149.39                  |
| 3                  | --                          | 148.36                   | C               | --                                    | 148.47                  |
| 3'                 | --                          | 147.5                    | C               | --                                    | 148.34                  |
| 1'                 | --                          | 129.77                   | C               | --                                    | 125.75                  |
| 5                  | --                          | 106.83                   | C               | --                                    | 107.22                  |
| 1                  | -                           | 154.3                    | C               | -                                     | 154.94                  |

Abduallah Elgazar- TA 13-HNMR-DMSO-AF.10.fid  
Abduallah Elgazar- TA 13-HNMR-DMSO-AF

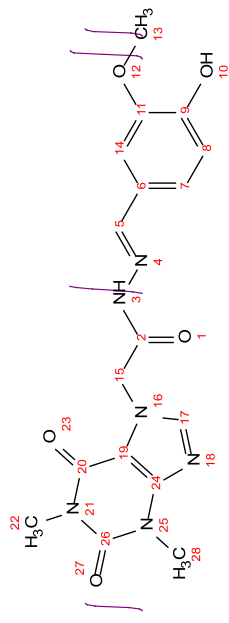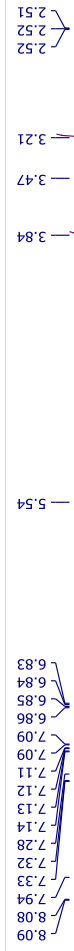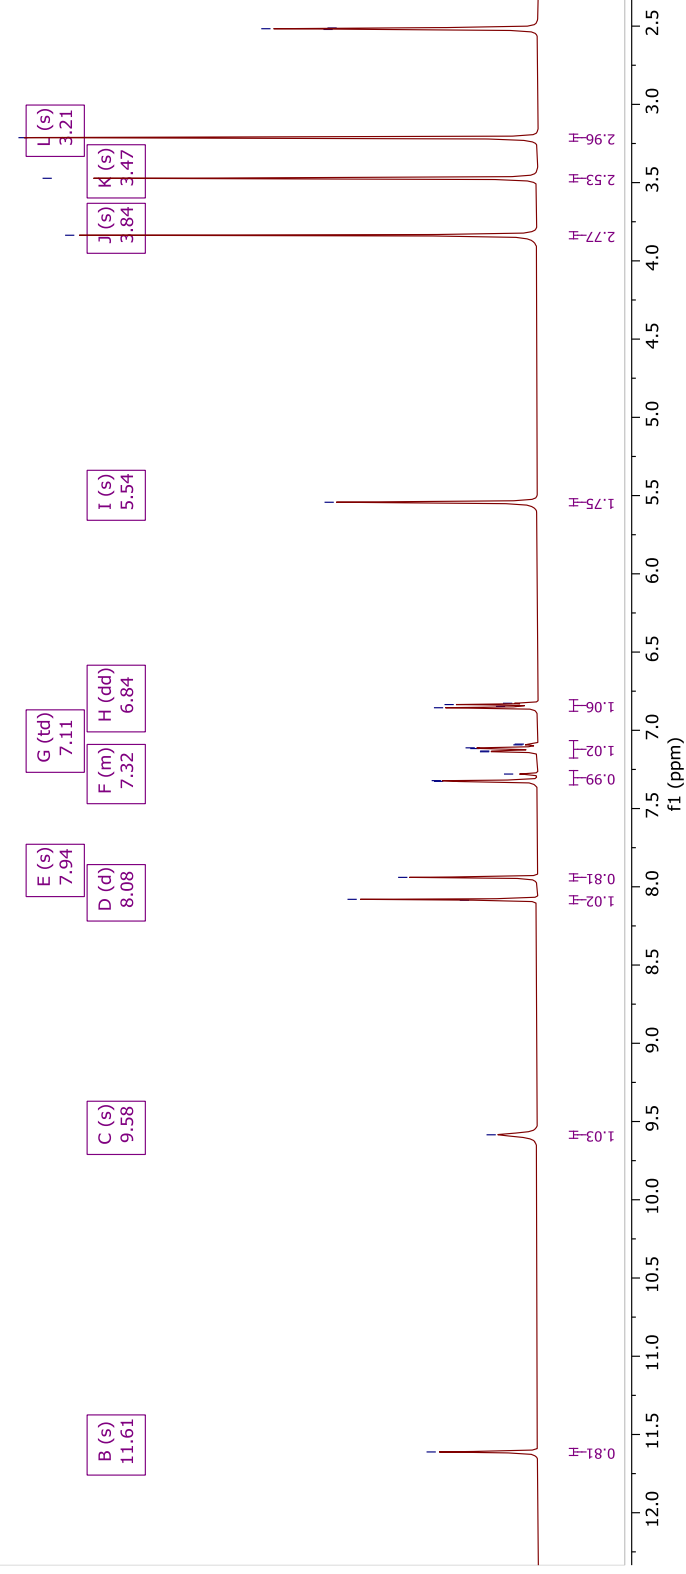

<sup>1</sup>H NMR spectrum of compound 18j

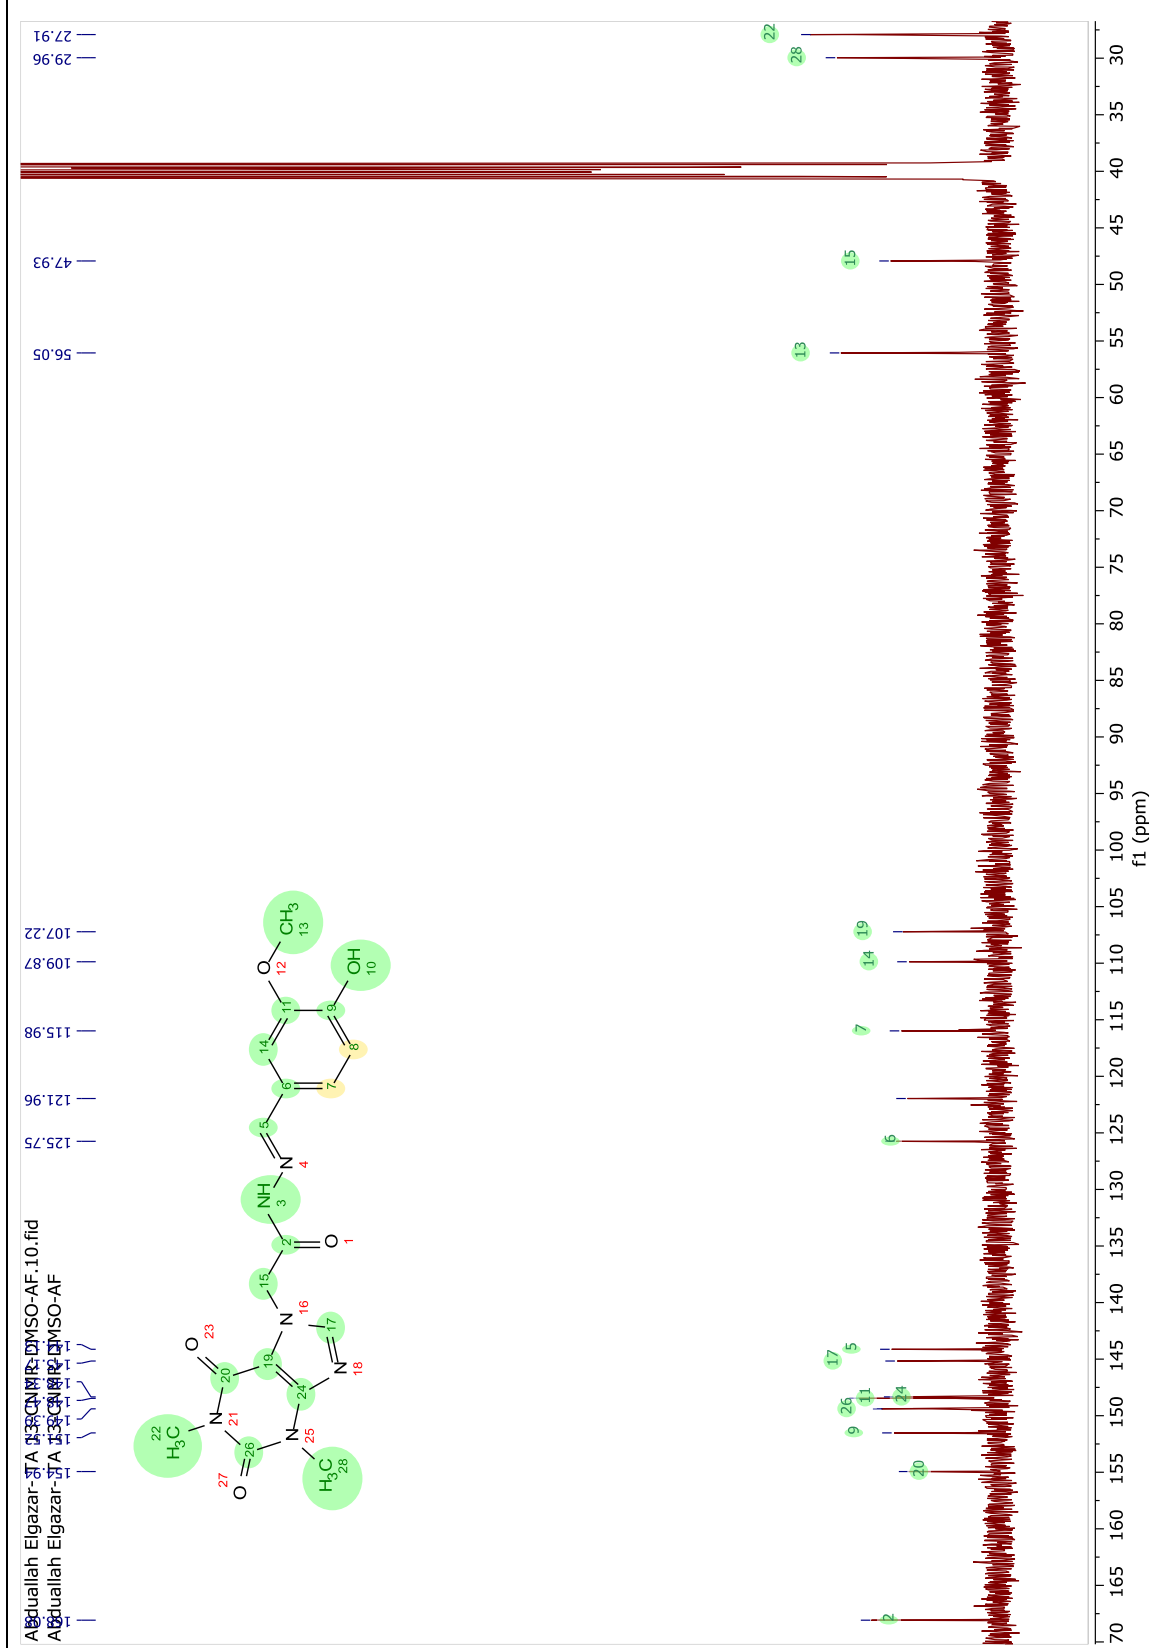

**<sup>13</sup>C NMR spectrum of compound 18j**

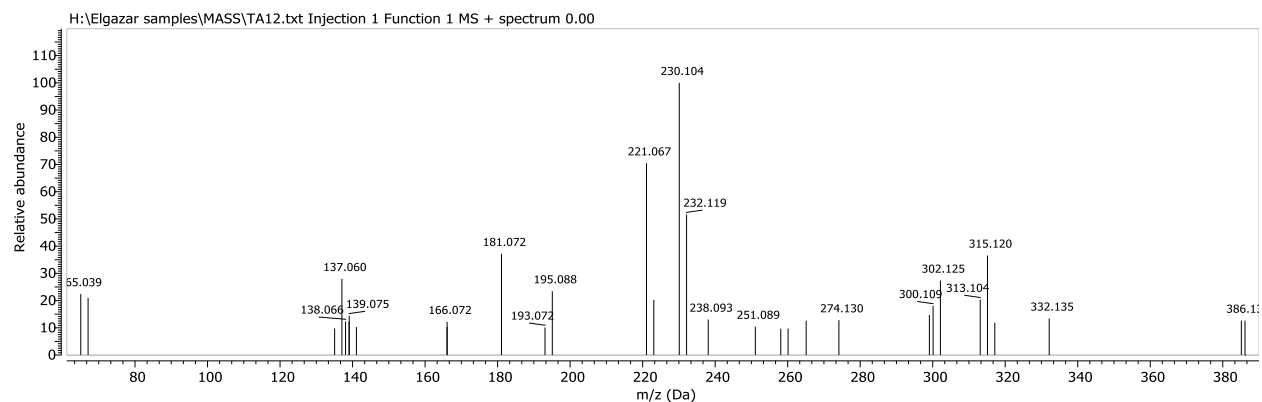

**Mass spectrum of compound 18j**

Table.s26 NMR assignment of acefylline-hydrazone cinnamaldehyde hybrid **18k**

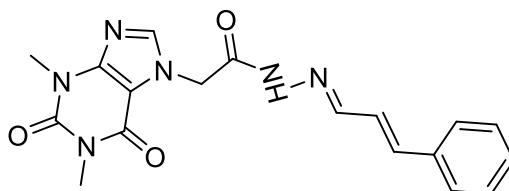

| Parent compound    |                             |                             | Hybrid compound |                                         |                         |
|--------------------|-----------------------------|-----------------------------|-----------------|-----------------------------------------|-------------------------|
| Atom<br>C/H        | <sup>1</sup> H(δ,ppm)(J,Hz) | <sup>13</sup> C<br>(δ, ppm) | DEPT            | <sup>1</sup> H(δ,ppm)(J,Hz)             | <sup>13</sup> C(δ, ppm) |
| COOH               | --                          | 169.48                      | C               | --                                      | 168.08                  |
| 1                  | -                           | 154.3                       | C               | --                                      | 154.94                  |
| Ph-CH              | 7.48                        | 152.46                      | CH              | 7.24 (d, <i>J</i> = 28.9 Hz, 1H)        | 151.50                  |
| 2                  | --                          | 151.13                      | C               | --                                      | 149.82                  |
| 3                  | --                          | 148.36                      | C               | --                                      | 148.32                  |
| 4                  | 8.04                        | 143.63                      | CH              | 7.87 (d, <i>J</i> = 12.3 Hz, 1H)        | 147.40                  |
| CH=N               | 10.2                        | 192.28                      | CH              | 8.06 (s, 1H)                            | 144.18                  |
| 1'                 | --                          | 136.47                      | C               | --                                      | 139.93                  |
| 4'                 | 7.64                        | 134.43                      | CH              | 7.65 – 7.61 (m, 1H)                     | 136.23                  |
| CH=CH              | 6.6                         | 131.17                      | CH              | 7.05 (dd, <i>J</i> = 29.9, 12.6 Hz, 1H) | 129.33                  |
| 2'                 | 7.87                        | 129.68                      | CH              | 7.65 – 7.61 (m, 1H)                     | 127.62                  |
| 6'                 | 7.87                        | 129.68                      | CH              | 7.65 – 7.61 (m, 1H)                     | 127.62                  |
| 5'                 | 7.56                        | 129.68                      | CH              | 7.45 – 7.38 (m, 1H)                     | 125.25                  |
| 3'                 | 7.56                        | 128.98                      | CH              | 7.45 – 7.38 (m, 1H)                     | 125.25                  |
| 5                  | --                          | 106.83                      | C               | --                                      | 107.13                  |
| CH <sub>2</sub> CO | 5.07                        | 47.6                        | CH <sub>2</sub> | 5.45 (s, 2H)                            | 47.72                   |
| 6                  | 3.44                        | 29.92                       | CH <sub>3</sub> | 3.46 (s, 3H)                            | 29.95                   |
| 7                  | 3.20                        | 27.9                        | CH <sub>3</sub> | 3.21 (s, 3H)                            | 27.91                   |
| NH                 | 11.25                       | --                          | NH              | 11.68 (s, 1H)                           | --                      |

Abdullah Elgazar- TA 10-HNMR-DMSO-AF.10.fid  
Abdullah Elgazar- TA 10-HNMR-DMSO-AF

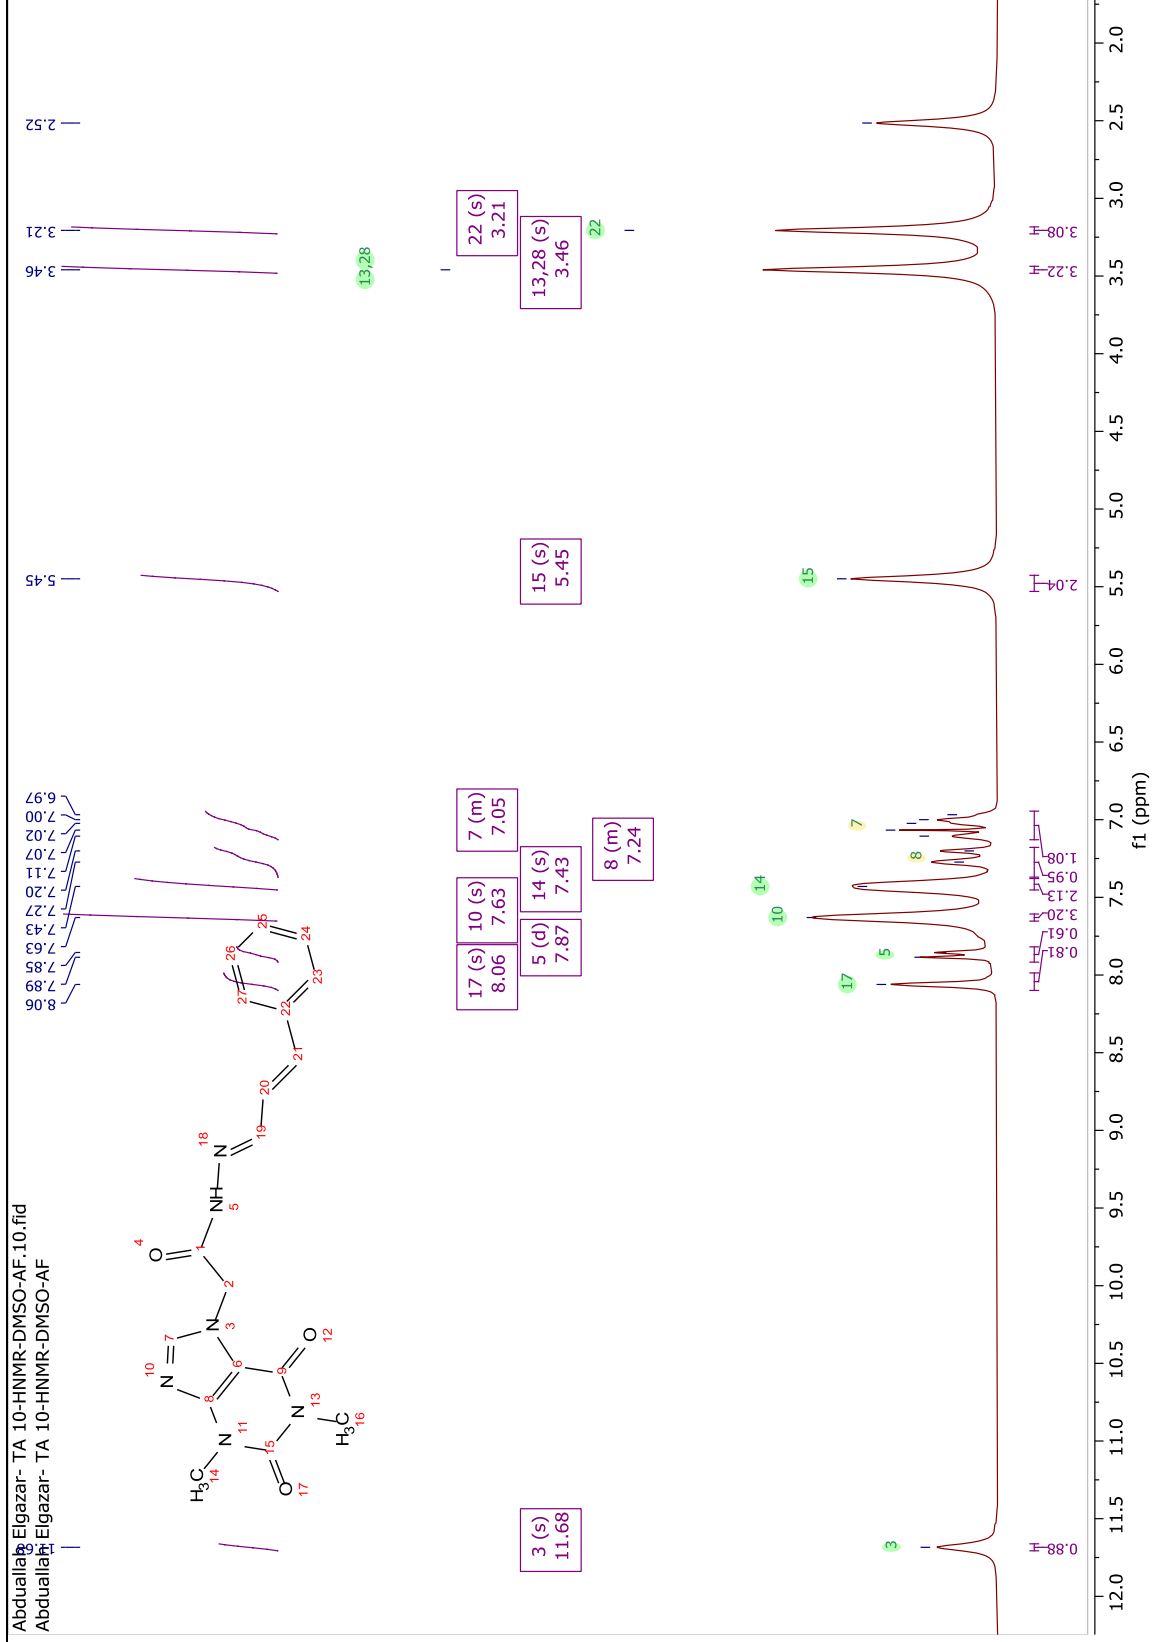

<sup>1</sup>H NMR spectrum of compound 18k





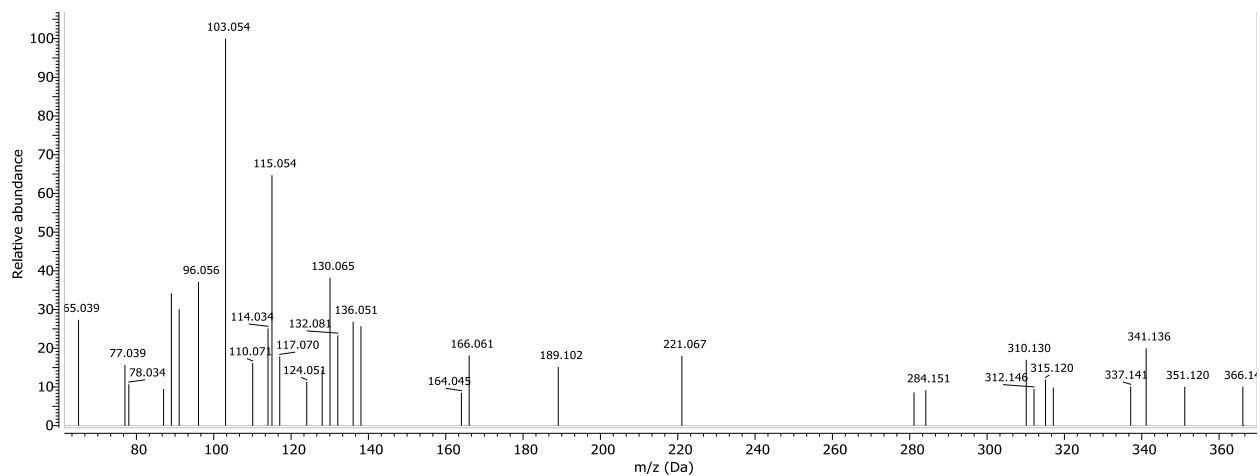

Mass spectrum of compound 18k

Table.s27 NMR assignment of acefylline-hydrazone anisaldehyde hybrid **18l**

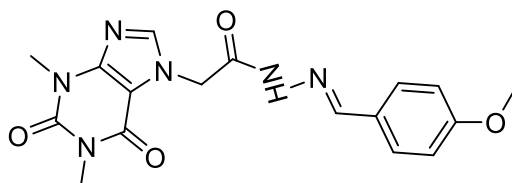

| Parent compound    |                             |                             | Hybrid compound |                                       |                         |
|--------------------|-----------------------------|-----------------------------|-----------------|---------------------------------------|-------------------------|
| Atom<br>C/H        | <sup>1</sup> H(δ,ppm)(J,Hz) | <sup>13</sup> C<br>(δ, ppm) | DEPT            | <sup>1</sup> H(δ,ppm)(J,Hz)           | <sup>13</sup> C(δ, ppm) |
| CH=N               | 10.6                        | 191.26                      | CH              | 8.07 (s, 1H)                          | 144.10                  |
| 4                  | 8.04                        | 143.63                      | CH              | 8.00 (s, 1H)                          | 144.64                  |
| 2'                 | 7.78                        | 132.56                      | CH              | 7.67 (dd, <i>J</i> = 7.2, 5.1 Hz, 1H) | 128.99                  |
| 6'                 | 7.78                        | 132.56                      | CH              | 7.67 (dd, <i>J</i> = 7.2, 5.1 Hz, 1H) | 128.99                  |
| 3'                 | 6.9                         | 116.06                      | CH              | 7.01 (dd, <i>J</i> = 9.0, 3.1 Hz, 1H) | 114.79                  |
| 5'                 | 6.9                         | 116.06                      | CH              | 7.01 (dd, <i>J</i> = 9.0, 3.1 Hz, 1H) | 114.79                  |
| CH <sub>2</sub> CO | 5.07                        | 47.6                        | CH <sub>2</sub> | 5.53 (s, 2H)                          | 47.84                   |
| OCH <sub>3</sub>   | 3.85                        | 56                          | CH <sub>3</sub> | 3.81 (s, 3H)                          | 55.78                   |
| 6                  | 3.44                        | 29.92                       | CH <sub>3</sub> | 3.46 (s, 3H)                          | 29.93                   |
| 7                  | 3.20                        | 27.9                        | CH <sub>3</sub> | 3.20 (s, 3H)                          | 27.89                   |
| NH                 | 11                          | --                          | NH              | 11.65 (s, 1H)                         | --                      |
| COOH               | --                          | 169.48                      | C               | --                                    | 168.15                  |
| 4'                 | --                          | 161.65                      | C               | --                                    | 161.28                  |
| 2                  | --                          | 151.13                      | C               | --                                    | 151.49                  |
| 3                  | --                          | 148.36                      | C               | --                                    | 148.30                  |
| 1'                 | --                          | 129.94                      | C               | --                                    | 126.89                  |
| 5                  | --                          | 106.83                      | C               | --                                    | 107.18                  |
| 1                  | -                           | 154.3                       | C               | -                                     | 154.91                  |

Abdullah Elgazar- TA 12-HNMR-DMSO-AE-10.fid  
Abdullah Elgazar- TA 12-HNMR-DMSO-AE

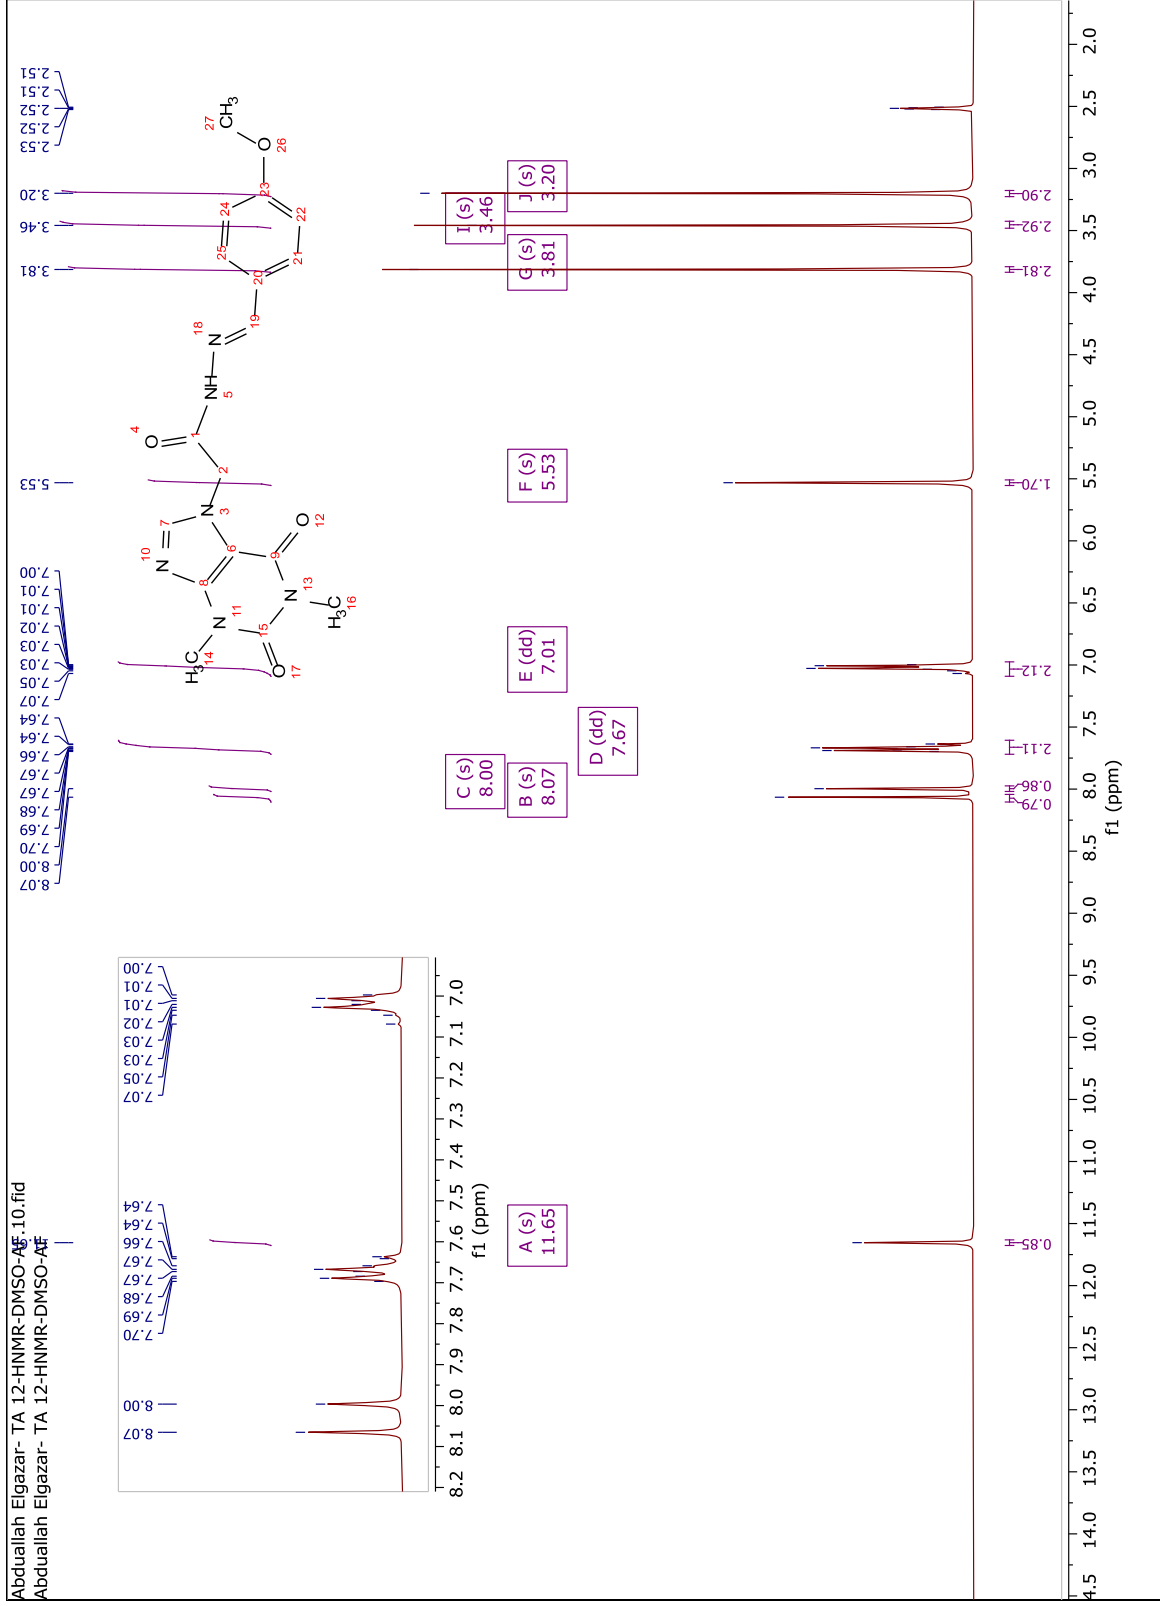

$^1\text{H}$  NMR spectrum of compound 18i

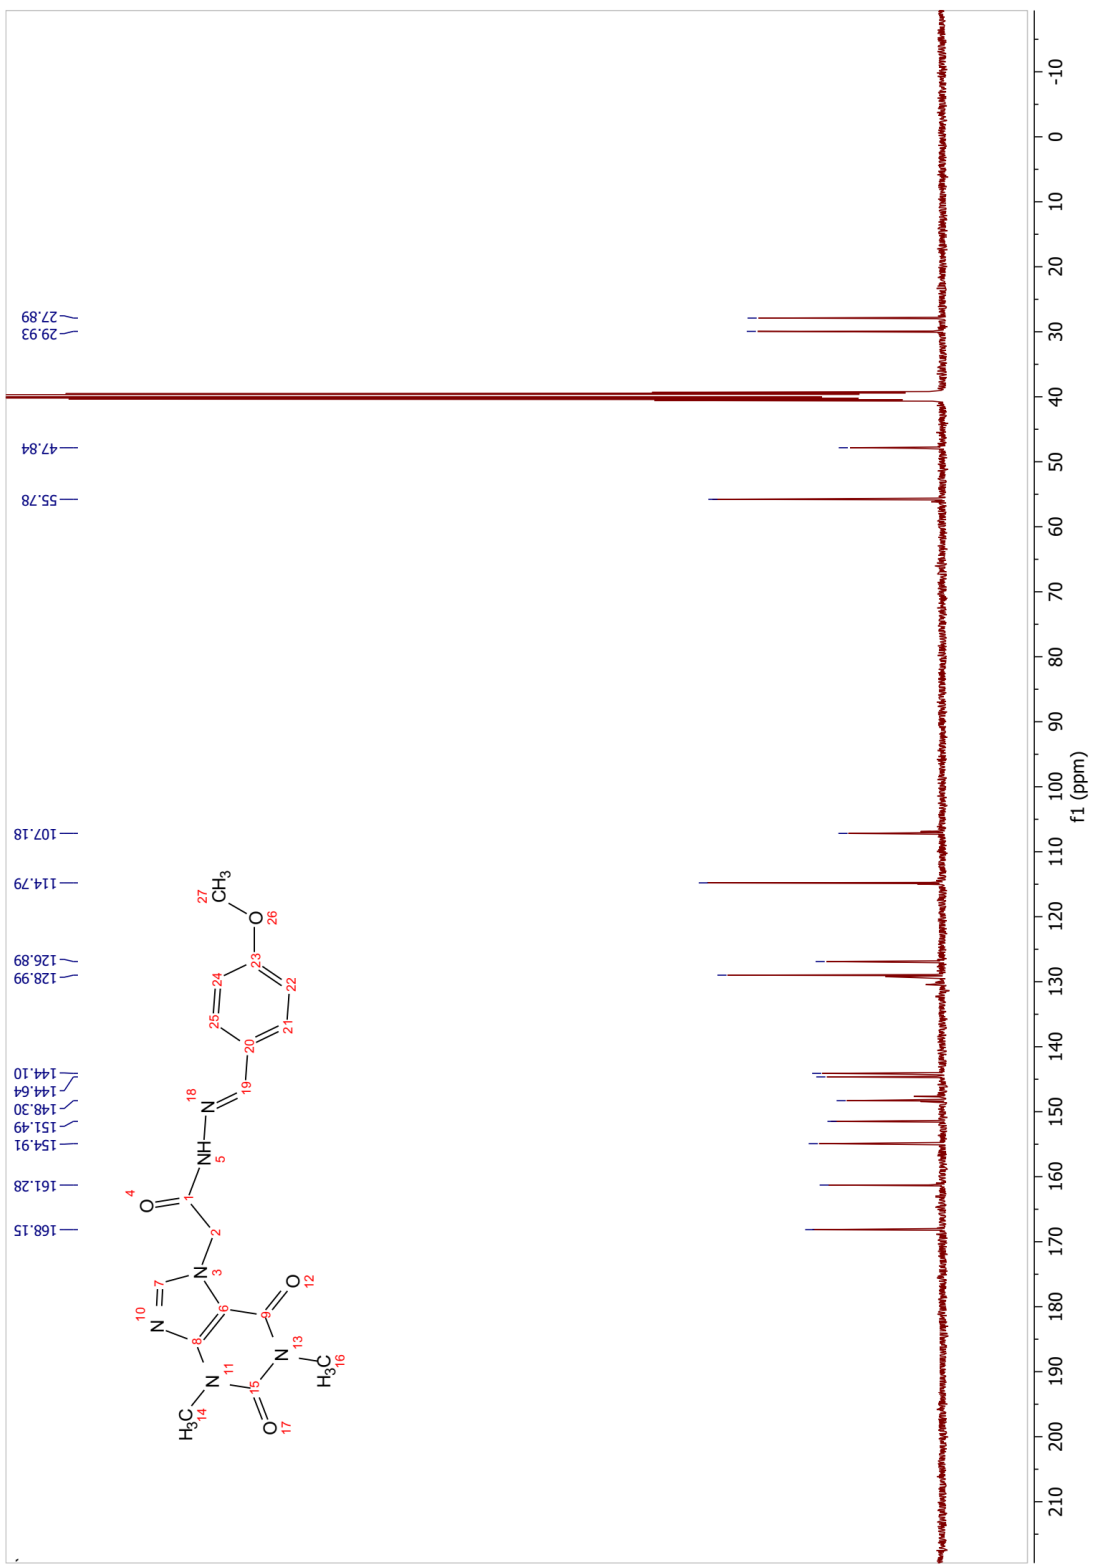

<sup>13</sup>C NMR spectrum of compound 181

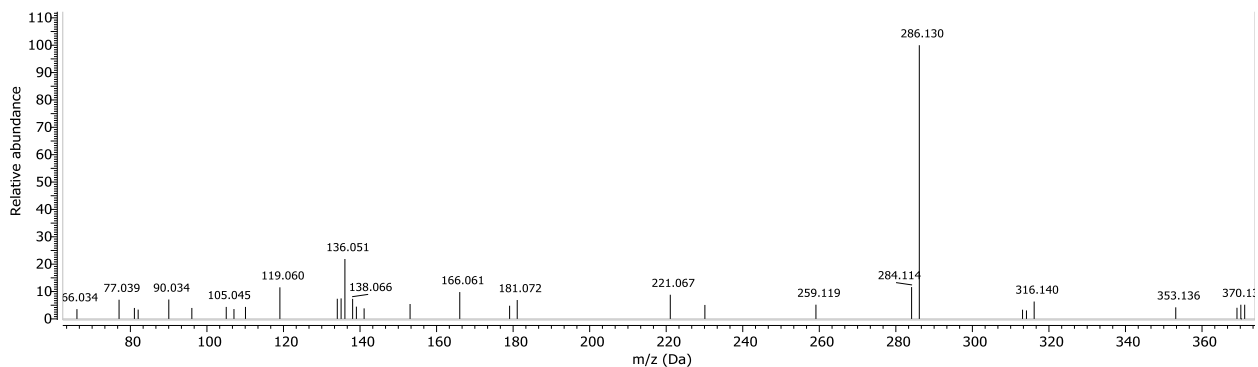

Mass spectrum of compound 18l

Table.s28 NMR assignment of acefylline-hydrazone isatin hybrid 19

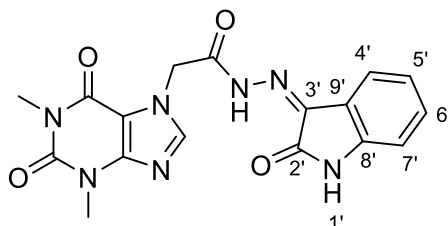

| Parent compound    |                             |                          | Hybrid compound |                             |                         |
|--------------------|-----------------------------|--------------------------|-----------------|-----------------------------|-------------------------|
| C/H Atom           | <sup>1</sup> H(δ,ppm)(J,Hz) | <sup>13</sup> C (δ, ppm) | DEPT            | <sup>1</sup> H(δ,ppm)(J,Hz) | <sup>13</sup> C(δ, ppm) |
| 4                  | 8.04                        | 143.63                   | CH              | 8.16 – 8.10 (m, 1H)         | 144.07                  |
| 4'                 | 7.50                        | 124.59                   | CH              | 7.72 – 7.34 (m, 1H)         | 132.48                  |
| 6'                 | 7.58                        | 117.73                   | CH              | 7.72 – 7.34 (m, 1H)         | 121.32                  |
| 5'                 | 7.07                        | 122.68                   | CH              | 7.17 – 6.77 (m, 1H)         | 123.17                  |
| 7'                 | 6.9                         | 112.12                   | CH              | 7.17 – 6.77 (m, 1H)         | 111.78                  |
| NH ISATIN          | 11.023                      | --                       | --              | 12.72 (s, 1H)               | --                      |
| NH-HYDRAZIDE       | 11                          | --                       | --              | 11.36 (s, 1H)               | --                      |
| CH <sub>2</sub> CO | 5.07                        | 47.6                     | CH <sub>2</sub> | 5.73 (s, 2H)                | 47.44                   |
| 6                  | 3.44                        | 29.92                    | CH <sub>3</sub> | 3.57 (s, 3H)                | 29.98                   |
| 7                  | 3.20                        | 27.9                     | CH <sub>3</sub> | 3.21 (s, 3H)                | 27.92                   |
| COOH               | --                          | 169.48                   | C               | --                          | 162.83                  |
| 2'                 | --                          | 159.26                   | C               | --                          | 154.97                  |
| 1                  | -                           | 154.3                    | C               | --                          | 154.97                  |
| 2                  | --                          | 151.13                   | C               | --                          | 151.50                  |
| 8'                 | --                          | 150.64                   | C               | --                          | 151.50                  |
| 3                  | --                          | 148.36                   | C               | --                          | 148.44                  |
| C=O/C=N            | 10.6                        | 184.3                    | C               | --                          | 143.21                  |
| 9'                 | --                          | 117.73                   | C               | -                           | 119.89                  |
| 5                  | --                          | 106.83                   | C               | --                          | 107.05                  |

Abdullah Elgazar- TA 14-HNMR-DMSO-AF.10.fid  
Abdullah Elgazar- TA 14-HNMR-DMSO-AF

8.12  
8.14  
7.64  
7.56  
7.49  
7.43  
7.14  
7.06  
6.99  
6.99

2.53

3.57

3.21

5.73

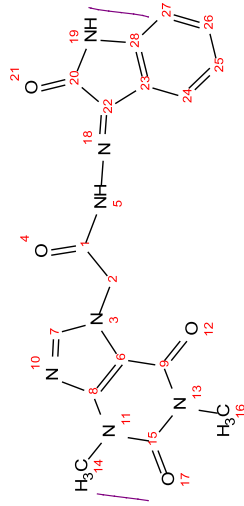

B (s)  
11.36

C (m)  
8.13

E (m)  
7.53

D (m)  
7.03

I (s)  
5.73

J (s)  
3.57

L (s)  
3.21

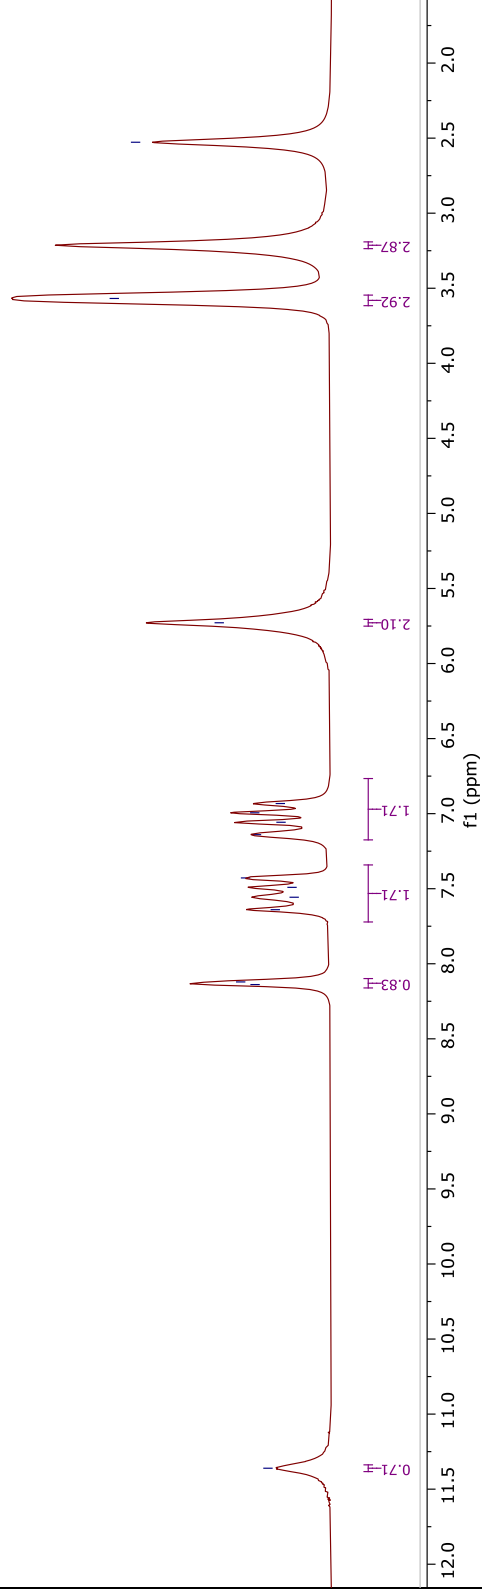

**<sup>1</sup>H NMR spectrum of compound 19**

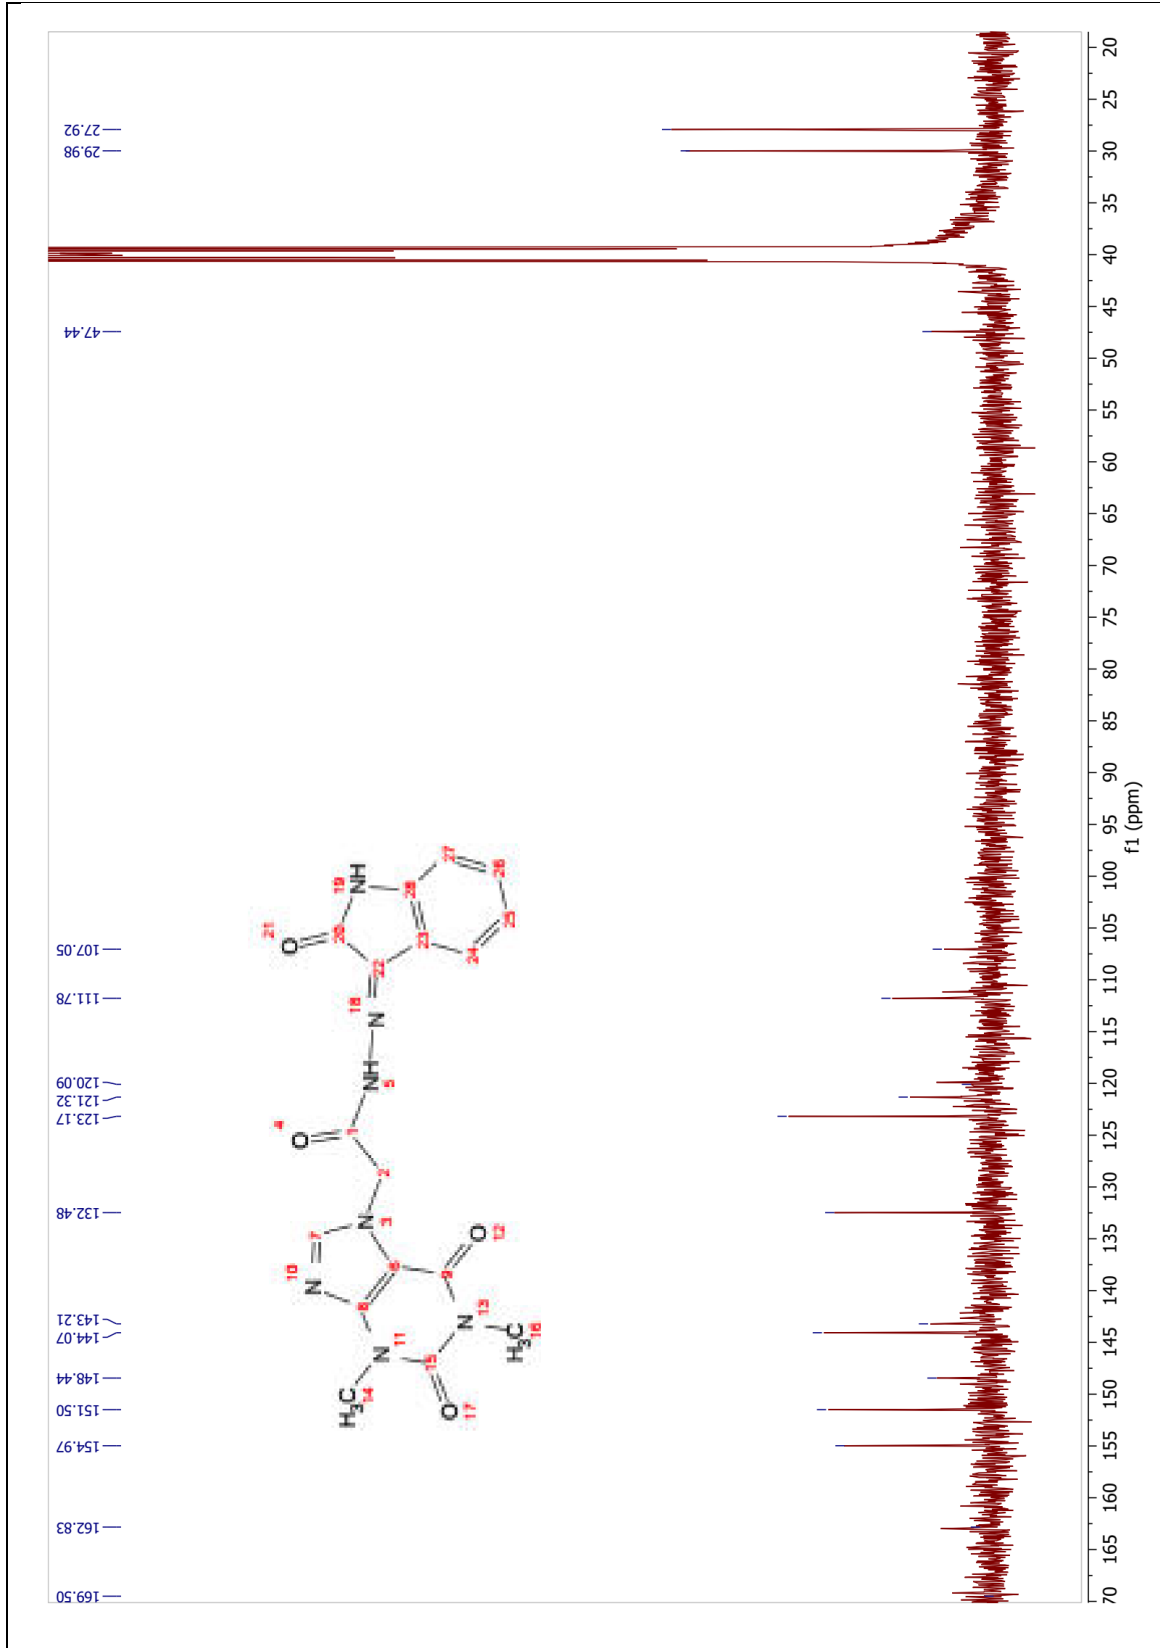

$^{13}\text{C}$  NMR spectrum of compound 19

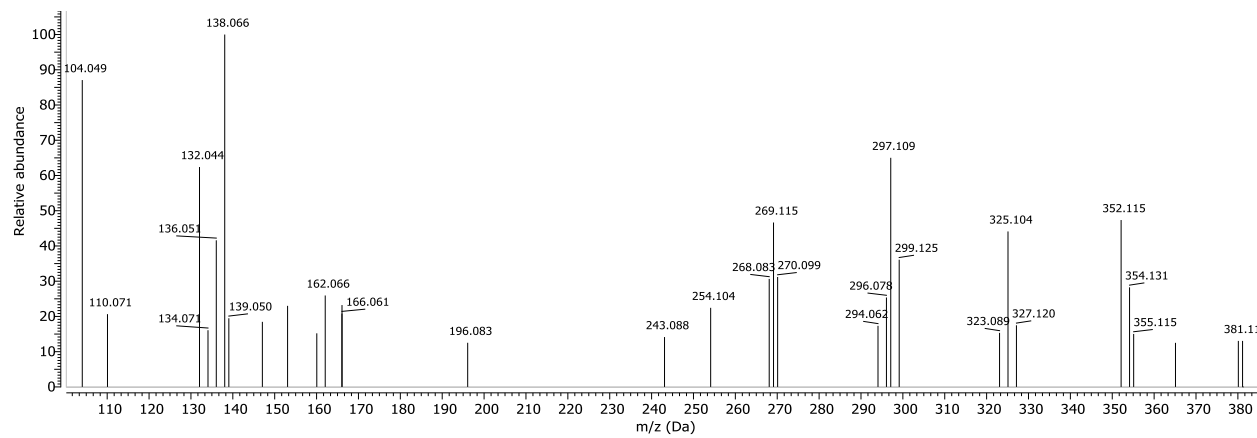

**Mass spectrum of compound 19**
